# Supplementary material
Source: publisher figshare collection journal article supplement (https://gsapubs.figshare.com/ndownloader/files/28102626)
Supplement: Supplementary file 1 [file 28102626]

LD		BGY		XF		XN		CX		WN		LT		HMG		ZTS		JBN		JX		Gonghai		LNT		HS		TD		BJD		Gobi-Altay		Qilian		QB		XNB		MYR+EMU		WMU+UYR		Weihe
18.3	0.3	24.1	0.3	59	3	212	3	270	7	91	3	19.3	0.4	26.6	1.1	1156	78	195.5	2.2	454.5137255	3.881357685	2217.2	8.58	121	3	20.9	0.9	3577.491379	4.048534696	205.1338985	19.4053604	4894	18	4971	9	99.9	3.1	491.8	16.4	109.1	3.3	11.1	0.1	73.2	2.75
31	1	33.2	0.4	88	4	234	3	431	15	119	1	40.2	0.6	57.3	3.3	1200	53	198.5	2.6	935.033782	9.185957233	2061.2	8.72	242	8	82	3	3490	8	230.6212775	3.664293421	4590	32	3573	27	102.6	2.9	276.9	10.5	153	2	30.16300543	7.274543777	74.88	0.415
34	1	37.5	0.5	89	2	235	4	367	18	121	2	43	0.5	106.6	2.6	2020	50	201.6	2.4	268.0067315	4.911328279	1777.2	9.48	229	13	194	4	3073.860378	75.31559018	244.4515565	2.288509734	2934	52	2877	30	105.9	5.9	327.5	10.6	168.3	2.1	30.7	0.4	76	9
66	2	100.9	1.3	110	2	247	4	381	28	161	4	44.8	0.8	203.2	3.6	2464	69	208.5	2.3	312.2225312	3.036643795	1653.7	10.5	147	3	204	5	2779	32	246.3811503	3.217683439	2518	32	2866	10	110.9	2.2	290.4	9.4	201.5	2.7	34.8	0.5	81	1.1
70	1	107.1	1.4	170	6	248	4	444	30	199	3	49.8	0.9	210	4.4	1896	68	209.2	2.5	433.0779199	3.672220394	1769.5	9.36	221	3	212	6	2729.919515	10.96105746	249.8650563	3.966862331	2457	41	2835	32	143.8	12.4	286.5	7.2	207	2	44.2	0.6	82.7	4.75
73	1	124.1	1.5	206	5	252	5	551	21	208	2	56.2	1.7	212.3	3.8	2542	100	214.5	2.7	426.0917767	3.572927151	1953.3	9.385	974	15	224	5	2664	11	257.1528542	6.785873164	2376	10	2733	30	216.1659466	4.237774762	446.2	19	210	2	74.4	0.9	92.3	2.3
99	3	165.9	1.9	216	9	252	5	278	7	211	3	60.6	0.8	243.6	6.7	2629	25	217.5	2.4	270.1450855	2.672029558	1755.9	9.055	223	4	232	4	2639	11	265.1268896	5.155551808	2172	53	2687	11	216.6045292	4.057310573	275.4	8.7	213	2.5	86.1	1.5	94.1	2.65
112	3	186.7	2	225	5	254	5	977	17	223	6	62.5	0.9	248.1	7.8	2430	41	218.5	2.7	422.8281248	3.746182362	2441.1	8.42	224	25	233	6	2638	9	267.1695234	1.765236755	2168	12	2546	36	218.2129151	3.729736335	445	9.3	219	2.6	102.9	1.8	105.6	3.6
117	2	194	2.1	226	6	254	4	472	11	223	3	89.6	1.1	248.4	7.1	2006	54	231.4	2.9	286.1494171	1.708139742	1671.5	9.625	212	5	235	5	2595	11	270.3437715	3.799991275	2095	30	2529	24	219.9703881	3.709031178	421.5	16.4	226.3	2.8	105.2	1.3	118.9	3.9
146	2	196.7	2.3	233	22	258	4	559	15	224	4	100.7	1.2	256.1	10.7	1952	30	231.5	4	262.7554891	2.235018215	1792.3	9.11	214	11	236	7	2554	12	271.9626489	2.971886651	2049	25	2528	8	224.9622114	3.343676526	269.3	9.6	237.6	3	105.8	2.2	128	16.5
189	3	197.3	2.1	235	5	263	4	336	36	230	3	105.4	1.2	275.9	11.1	2436	27	231.6	2.7	276.4636578	2.868571846	292	1.945	217	8	237	6	2554	10	272.0742341	4.163569149	2043	25	2513	8	225.4858835	4.358587066	446.9	11.3	244.3	3.2	131.8	1.6	131.6	2.5
202	3	200.2	2.2	240	5	263	3	303	4	234	3	105.6	1.3	277.2	10.9	2232	63	233.8	2.7	278.9962778	2.780108779	398.9	2.625	207	3	237	5	2536	10	272.4894726	2.956607573	2036	67	2508	27	225.5082241	7.494993906	257.7	8.1	245.5	3.2	147.8	1.8	134	11.5
204	6	201.2	2.2	247	6	265	6	429	8	237	3	121.3	2.3	279.1	6.6	1939	21	234.2	2.7	281.2282162	2.823334117	385.2	2.52	233	5	239	7	2536	9	272.702675	3.393754063	1971	27	2501	47	226.4	11.7	269.8	10.1	252	3	168.4	2.3	137.2	4
219	6	204.7	2.2	248	7	267	4	547	11	251	5	128	1.5	280.9	13.1	1866	40	236.3	2.9	252.0092059	4.285671458	1722.1	10.17	208	9	243	6	2530.445227	6.325098266	274.0344702	4.777555458	1961	45	2492	9	229.9084035	4.300103156	285.2	6.5	252	2	175.7	1.75	140.3	2.55
223	6	205.7	2.4	249	4	269	6	234	10	252	5	141.9	1.8	297.5	6.3	1759	37	237.5	2.9	269.4167813	2.445558937	2432.9	8.425	196	3	246	5	2529.406245	31.92419105	274.1009674	2.944966515	1953	18	2490	26	230.7477564	3.701897886	459.4	15.9	254	2	179.1	2.2	149.8	3.2
226	5	206.2	2.3	250	4	280	4	485	8	257	4	167.6	2.1	301	8.3	2339	38	241.9	3.1	269.0297812	2.561874729	1845.6	9.115	210	4	246	6	2527.424091	1.103016547	276.3529785	4.574551161	1940	60	2473	35	232.6911169	5.08074221	268.1	7.9	254.1	2.9	182.8	2.3	149.9	3.45
226	6	206.2	1.9	252	4	283	5	426	6	263	4	182.8	2.3	324.8	9.9	2341	29	243	2.8	270.5247243	3.460426643	1920.6	8.92	876	11	250	6	2526	8	279.9146865	4.54079466	1931	67	2466	31	233.2	6.6	297.9	9.8	256	3	195.1	2.3	165.1	1.5
227	7	208.5	2.4	262	6	287	5	963	14	267	5	185.6	2.1	342	13.6	2411	20	243.4	2.8	271.6736207	2.377549007	1854.1	8.99	205	8	253	8	2526	13	280.726442	6.652572938	1927	226	2443	34	233.8	14	266.8	7.6	256.7	6.2	199	2.5	168.9	1.9
228	5	208.5	2.3	262	4	290	6	291	5	273	5	190.3	2.5	347.8	12.2	1962	62	247.9	3	323.7019941	3.494377077	306.9	2.165	192	3	255	6	2526	11	283.2206314	5.600967177	1917	54	2443	54	234.1722872	7.033549636	456.8	64.3	257.2	3.6	201.4	2.6	179.2	4.95
229	5	210.1	2.6	274	10	304	7	521	11	282	6	191.2	2.4	348.2	5.5	2379	39	248.7	2.9	264.8977497	1.664682123	2342	8.52	248	4	257	6	2523	10	285.0327459	3.160591371	1912	9	2437	26	235.8	7.6	501.1	16	258	3	202.7	3.3	185	10
230	5	210.5	2.7	275	11	309	5	489	7	291	5	194.2	2.9	386.2	31.1	2470	45	250.4	3	280.4515861	3.095983252	2622.5	8.27	193	8	261	7	2522.586174	4.571535053	285.5077652	12.38871922	1898	12	2427	11	236.033238	3.722473576	383.8	8.8	260	7	203.1	2.6	185.5	1.2
231	6	216	3.3	276	5	316	8	449	6	291	3	196	2.7	391.8	6.9	1725	79	250.4	2.9	423.3178884	3.704441428	1915.7	9	400	5	263	10	2518	10	285.6582266	1.819005381	1887	32	2425	9	236.7	18.6	587.3	15.2	260	3	203.3	2.8	192	1.85
231	9	217.1	2.6	287	6	325	6	470	15	297	4	196.6	2.4	412.4	15.9	1093	43	250.4	3	294.2261501	2.831464459	2462.4	8.585	195	3	266	8	2518	11	288.6934525	5.316679918	1876	11	2416	27	238.0859258	4.6783563	281.7	7.6	261	3	204	2.6	199.2	1.8
232	4	217.3	2.5	290	8	325	6	999	19	304	6	198.6	2.8	421.7	11	1981	27	251.3	3.5	319.9143283	4.324218426	1857.4	9.04	196	4	270	6	2516	10	288.8494699	8.997638609	1870	48	2413	10	240.4	6	279.1	7.6	261	4	204.1	2.4	201.5	2.55
238	3	217.4	2.6	291	6	338	5	547	10	304	6	200.7	2.5	430.7	20.1	2187	61	252.6	3.3	275.5724837	2.444767536	1721.3	9.85	198	5	272	7	2515	9	289.1886706	5.247819781	1863	32	2398	9	240.8	7.8	451.6	14.8	261.6	5.8	204.2	3.1	206.3	1.3
238	4	217.8	4.2	309	10	344	9	962	19	307	5	202.3	2.5	442	26.6	1487	96	254.8	3	899.423887	5.834833139	1945.7	8.91	175	4	274	7	2510	11	289.220126	5.985886078	1860	10	2337	35	240.8458728	7.12532827	455.2	14	262.6	3	204.3	2.4	211.7	1.45
243	8	218	2.6	310	12	399	4	840	12	312	4	203.7	3.4	445.7	11.3	2013	37	257.9	2.9	420.9004022	3.93079263	306.5	2.015	426	7	275	8	2509.675921	7.543797806	289.8441848	7.0975581	1852	11	2310	64	241	20.1	322	8.6	264.1	4.3	205	1.1	212.2	3.05
243	6	218.8	2.4	310	14	416	7	422	6	323	8	205.4	2.5	448.3	13.5	1193	85	263.8	2.9	275.6253975	3.176109564	2524.2	8.34	244	4	275	7	2509	11	289.8979881	2.691452179	1845	44	2308	29	241.5	6.7	275.3	6.3	265	5	205.2	2.7	213.6	1
245	5	221	2.7	319	11	422	7	472	8	379	9	206.4	2.3	458.8	10.7	2365	97	264.8	3.5	274.0228235	2.997090955	2507.7	8.385	168	3	279	13	2507	44	291.4821423	6.227295385	1834	12	2306	45	242.1	8	299	10.7	265.3	3.4	206	2.7	217.4	2.05
250	7	221.1	3.1	321	9	422	5	477	8	380	7	209.3	3	464.9	22.1	2429	90	267.5	3.3	351.6864245	3.806647374	2447.1	8.41	168	5	280	10	2506.317625	4.450840777	291.9323195	7.865616157	1834	30	2276	110	243.7361961	5.512584557	445.5	16.2	266.2	3.5	206.1	2.6	217.9	4.25
252	5	221.8	2.8	325	25	422	7	254	5	396	8	210.2	3.8	467.3	26.9	2595	32	269.6	3.2	271.5841065	2.258484804	1940.1	9.085	184	2	281	8	2505.386491	44.61021895	293.3776673	5.222030126	1833	45	2235	56	244.1658829	4.901596533	465.3	15.5	267	2.1	206.4	2.8	219.5	0.85
254	5	222.2	2.2	335	7	424	6	266	4	403	7	210.5	2.4	471.4	39.1	1699	30	270.2	3	442.3985944	3.440323309	267.3	1.755	276	4	282	9	2505	36	293.4602822	4.616638039	1831	56	2140	39	244.2	7.6	325.9	10.6	267	5	206.7	2.7	221	1
254	5	223.1	2.6	342	11	426	5	281	11	415	7	210.5	2.6	479.6	17.5	1903	45	273.4	3.2	594.9246174	4.011513478	1896.8	9.06	211	3	291	5	2504	13	293.463158	5.294869987	1820	13	2080	12	246.6091205	5.535826543	446.4	11.2	268	4	207.7	2.6	221.4	2.05
254	4	223.3	1.9	378	7	431	7	458	7	416	5	212.1	2.4	495.3	12.7	1924	126	274.4	3.4	253.2230067	5.004294478	299.3	1.965	185	3	294	6	2501	9	293.9689161	4.98887448	1810	31	2061	9	247.8481249	4.040445379	465.3	15.2	269.5	6.5	208.6	2.9	221.9	1.55
255	7	225.4	2.5	392	6	431	8	475	8	419	7	213	2.5	506.9	34.5	1233	41	275.5	3.6	317.3229328	2.489988439	2576.6	8.355	154	5	295	7	2501	10	296.5225601	6.411554764	1808	111	2061	62	248.5893457	5.157140533	473.6	16.2	273	4	210.7	2.7	223.4	4.5
256	4	226.1	2.9	416	7	431	5	523	9	419	7	213.9	2.9	511.8	17.8	1938	91	277.9	3.4	439.8403566	5.34877105	1870.9	9.06	303	5	302	8	2500	12	296.5432675	2.195784228	1801	34	2015	10	248.661075	5.401626181	480.9	13	273.1	2.2	210.7	3.2	223.9	1.3
260	8	227.1	3.2	422	7	433	8	998	13	426	6	215.7	2.7	685.9	17	2325	56	278.1	3	274.9575131	2.018343529	2419.2	8.455	321	7	302	9	2498.649436	11.96721753	297.9079886	7.384924759	1789	78	2001	11	249.3	7.3	471.5	19.2	273.4	2	210.7	2.6	229.1	1.75
262	5	227.4	2.5	426	7	444	7	251	5	429	7	216.5	2.7	698.9	61.9	1896	28	280.5	3.3	317.3044589	2.391582229	1770.3	9.445	197	6	309	7	2495.302474	7.624873078	298.6198464	3.531090312	1760	42	1983	10	249.6	19	464.7	8.6	274	4	211.2	2.7	230.9	3.85
263	7	227.4	2.7	427	18	451	6	419	6	432	7	220.6	3.8	754	10.4	2470	87	285.1	3.6	326.3317374	3.485971761	1829.8	9.18	269	7	316	9	2494	10	298.9964271	5.446997232	1758	85	1983	30	249.7	4.3	276.3	6	274.1	4	211.2	2.6	232.3	1.5
266	6	229.4	2.9	428	9	459	6	488	7	433	6	222.7	2.7	754.4	16.7	2436	34	289.5	3.4	432.2140383	3.618911285	384.5	2.49	379	8	323	14	2490	11	298.9989582	7.791302329	1751	14	1976	49	250.6	5.6	439.3	11.6	274.9	3.9	211.4	2.7	233.9	2.75
269	6	230.2	2.9	430	7	459	8	741	11	437	5	224.9	2.9	766.5	45.4	2362	70	294.7	3.4	268.1695095	1.807875048	413	2.915	293	10	328	9	2486.136428	3.876476045	300.5513434	4.574815435	1744	12	1972	11	250.9	5.7	462.4	19.6	276	3	211.7	2.7	238.1	3.4
270	4	230.2	2.7	433	8	461	8	853	11	441	6	231.2	2.7	803.1	18	2618	126	314.1	4.1	330.845877	7.990766884	1880.1	8.985	407	10	351	9	2482	14	300.7023447	2.311903057	1704	29	1967	10	251.7	5.8	467.1	16.2	276.5	2	211.9	2.7	240	1.2
280	6	230.8	2.6	433	23	462	9	508	11	449	7	232.3	3.2	885.1	22.8	2546	56	324.2	3.9	448.0648445	4.564715288	322.1	2.11	152	4	354	8	2481	22	301.5511048	7.203289739	1680	29	1967	42	252.9	4	472.7	14.8	278	3	212.3	2.7	241	9
282	7	232.1	1.8	435	15	466	6	500	11	449	7	233.5	2.9	927.1	59.1	1462	33	338.6	5.4	264.6587352	2.30534445	1872.2	9.025	231	4	357	9	2480	30	301.6721212	7.966685895	1680	68	1965	11	253.1278511	4.44156276	287	9	278.2	2	212.5	2.6	244	10
284	5	233	2.7	436	9	467	9	429	8	450	7	234	3.1	931.2	25.9	1902	25	346.1	3.8	262.6938358	1.959051547	1777.7	9.78	98	3	358	10	2479	11	303.4111735	4.891989384	1678	24	1961	41	253.2176253	3.98280635	443.2	13.8	278.9	2.7	212.5	2.9	273.8	3.05
287	5	233.8	2.7	439	7	482	9	412	15	451	7	235.6	2.9	932.5	46.6	1674	82	362.9	4.1	620.6930818	4.429597516	283	1.86	120	2	359	10	2478	28	306.5479387	4.487703076	1675	88	1925	31	253.2387386	11.89089997	306	9.2	279	4	213.6	2.6	275.4	2.55
289	6	234.4	2.9	442	10	498	15	962	17	458	7	236.4	3.5	980.4	17.5	1630	47	364.1	4.4	279.0860087	2.39653397	302.6	1.98	526	7	362	9	2477	9	312.1401776	3.860480699	1672	31	1921	11	253.3	5.7	276.6	6.9	279.2	3.9	213.7	2.6	298.2	3
290	8	234.8	2.5	445	8	506	9	972	12	464	7	236.7	3.9	981.4	19.9	231	2	369.2	4.6	278.6480834	3.359476336	2301.2	8.595	855	14	365	9	2472	10	314.442178	10.96406001	1661	41	1908	33	253.3	9.3	304.8	9.5	280	3	214.5	2.9	326.3	1.7
291	9	235	3.2	447	26	506	8	482	7	467	8	237.4	2.8	992.5	17.7	239	2	376.6	4.4	291.7397892	2.872933565	1806.4	9.2	125	2	366	7	2471	9	318.0648621	22.35459626	1658	47	1903	11	254.3034959	5.697000718	261.2	6.3	280.7	2	214.5	3.1	384	6
295	5	236.9	3	453	8	508	9	463	7	468	7	238	3.2	1012.7	33	256	2	380.9	4.1	281.0623129	2.603432441	1907.1	9.075	209	4	374	8	2471	10	328.6277557	8.791627259	1641	45	1899	37	254.3899751	4.810556697	981.3	25.1	282	3	214.6	2.6	389.3	1.8
296	6	236.9	2.9	455	9	509	9	453	6	471	7	238.5	3	1056	50	257	3	394.1	4.2	425.4480977	2.787388055	1709.2	9.795	128	2	375	21	2470	11	330.4442145	21.99178892	1641	39	1890	39	255.4400103	5.560634526	428.1	9.2	286	6	215	2.9	398	8
296	6	237.4	3.4	456	12	524	8	442	9	490	7	239	2.7	1190.3	10.4	264	2	396.8	4.2	262.6590661	3.570612472	2215.3	8.9	107	3	384	8	2469	10	342.9506636	9.604520046	1639	64	1890	39	256.1	7.5	934	21.5	286	4	215.5	2.6	411	6
297	6	238.2	3	459	29	555	8	424	9	490	7	240.2	3	1367.7	10.7	270	3	397.4	4.4	263.5442154	2.383285891	1849.8	9.09	26.2	0.8	388	8	2469	11	353.4612575	5.938812858	1613	44	1871	34	256.3516151	5.477786166	272.8	7.1	286.6	3.5	216.5	2.8	411.3	1.7
306	7	238.4	2.2	468	31	567	9	419	7	509	7	240.2	2.9	1430.4	13.1	289	3	398.3	4.4	275.8931426	3.107031713	333.1	2.16	487	8	388	13	2466.286817	4.067501809	358.3987903	13.15959668	1601	71	1868	40	256.4668095	4.943373163	462	12.1	288.1	7.5	216.8435149	3.031202182	437.2	4.8
315	6	238.4	2.8	468	8	627	11	412	6	579	9	240.3	3.4	1449	14.1	295	2	398.6	5.2	265.4602349	2.852851373	1852.2	9.35	223	8	389	8	2464	11	360.3171906	9.679997434	1574	87	1863	10	256.6	17.1	948.5	33.1	289	3	217	2.9	438.7	2.2
325	7	238.6	2.5	469	11	710	12	403	6	675	13	240.7	2.7	1557.6	26.3	397	3	407.7	4.4	421.2004005	5.754934793	1838.2	9.135	448	8	391	9	2461.987067	31.52248313	370.5856597	6.739018325	1530	62	1862	40	256.9	7	832.9	25.2	290.6	6.9	218.5	2.6	440.1	3.35
328	11	239.1	2.8	470	9	734	14	494	9	689	9	240.7	2.7	1642.3	18	407	3	411.8	5	251.7729572	2.184721547	2518	8.405	114	2	407	8	2460	10	398.3168133	6.438828242	1501	116	1860	12	257	17.4	264.3	7.6	291	4	218.7	2.9	440.2	3.4
331	6	240.2	2.6	472	11	745	16	807	11	730	12	241.4	3	1684.9	16.3	205	2	415.9	4.9	290.8030336	3.612859814	1827.2	9.12	232	4	410	10	2459	11	403.1417994	5.753188886	1490	41	1860	33	257.2373109	4.202123085	954.2	20.1	291	4	218.7	2.6	443	7.5
342	10	240.5	2.8	475	13	750	11	754	15	768	13	242.1	2.8	1738	9.3	218	3	419.9	5.1	319.4414751	4.238040761	286.4	1.885	94	3	411	9	2451	7	419.9114048	6.598452883	1452	21	1855	9	257.2689673	5.099099461	939.7	20.3	291	4	218.9	2.7	443.2	3.95
342	6	242	2.7	476	7	752	11	899	12	796	15	242.9	2.9	1740.7	17.2	439	4	421.1	4.8	273.4636162	2.533616857	1876.8	9.08	259	6	411	12	2448	9	422.1014561	7.730560889	1432	30	1854	13	257.4164019	5.396732841	993.8	26.1	291	5	218.9	1.25	443.7	3.25
344	9	243.8	2.7	479	10	772	14	435	9	839	10	244.5	3.2	1763.7	9.8	269	3	421.3	5	269.862987	2.401015618	1827.4	9.49	101	2	415	12	2448	10	430.0120097	8.694949998	1431	41	1851	37	257.7	8.2	948.4	23	291.2	3.3	219.1	2.8	445.4	3.9
367	5	244	3.3	482	7	775	8	280	4	857	13	244.8	2.9	1850.2	12.3	275	2	432.2	4.8	260.0623365	2.267682601	418.4	2.695	329	5	416	10	2445.939585	14.11959445	436.8331652	4.710407434	1391	15	1849	10	257.8	8.7	944	34.6	292	9	219.8	2.7	445.8	4.05
370	7	244.3	2.7	484	11	793	11	806	21	857	13	245.6	2.9	1853.2	12.1	283	3	437.7	4.8	252.7148543	2.344012547	326.2	2.115	381	9	417	8	2442	10	439.1260735	3.698020472	1373	99	1845	12	257.9	10.1	890.5	25.4	293.1	7.2	220.2708511	7.818450369	447	6
374	6	244.5	2.1	485	8	819	10	397	8	880	22	245.8	3	1853.7	10.6	869	6	439.9	4.9	275.4903091	2.804727669	327.3	2.14	105	1	419	11	2438	10	441.3104089	5.477346208	1288	30	1840	46	258.0616833	4.226639819	858.2	21.5	293.2	2.1	220.6	3	448.1	2.15
382	11	244.6	2.7	486	12	830	9	988	14	938	13	247.7	3.2	1857.3	22.7	439	4	440.7	5.1	262.1462231	10.76592008	539.9	3.45	239	4	424	12	2428.222458	30.85583651	441.7161065	22.15284585	1279	69	1836	28	258.0710533	4.701585895	466.2	13.6	295	4	221.6	2.7	448.2	3.45
383	11	246.2	2.9	487	13	841	10	984	12	965	12	248.6	3	1858.8	19.6	854	6	441.6	5.8	277.2465966	2.616890503	1929.1	9.245	218	5	426	19	2428	12	443.7071299	12.15107775	1237	39	1831	9	258.5	9	936.7	30.6	295	4	221.7	1.7	450	5.5
387	9	246.6	2.7	487	9	858	11	233	5	970	14	250.4	3.5	1859.6	17.9	892	7	443	5.1	356.9253073	3.038097599	2448.5	8.495	140	2	426	13	2420	12	447.3725374	6.454446175	1228	13	1829	31	258.5	13.8	466.9	13.8	295.5	7	222.5	2.6	451.5	3.7
388	9	247.5	2.9	495	22	888	12	456	7	991	67	255.3	3.3	1866.6	12.1	972	7	447.2	4.8	456.3525525	6.396320749	929	5.735	392	6	428	8	2418	18	450.1466025	4.444494738	1202	50	1825	10	258.5127339	5.664489459	944.2	26	296	4	222.8	2.6	454	7
396	6	247.9	3.2	496	17	933	15	437	9	1056	61	257.5	3	1894	11.7	23	0.5	447.5	4.8	260.3464066	5.948159105	1898.2	10.5	366	5	430	7	2414	43	478.9225827	5.57457402	1199	89	1823	26	258.5267644	4.599380699	446.4	10	296.1	7.1	222.9	1.8	455	8
401	8	248.1	2.9	506	8	936	20	308	12	1398	64	259	3.9	2037.3	10.7	262	3	447.9	4.9	261.0895589	1.977444832	1893.9	9.015	396	5	431	9	2405	10	501.7940923	5.665184343	1182	47	1821	15	258.5393846	4.574788284	451.7	13.8	296.2	2.2	223.8	3.5	455.1	2.65
401	8	248.2	2.8	509	27	940	14	458	6	1429	90	259.3	3.5	2038.3	15.5	297	3	454.6	5	270.5642874	7.026193651	1890.8	9.255	343	5	432	9	2404	10	542.3365148	13.38833858	1176	12	1819	38	258.6150665	4.798592338	943.4	22.7	296.4	7.2	224	2.7	457.5	3.95
410	9	248.2	2	510	14	941	8	442	6	1487	65	259.8	3.6	2085.2	16	312	4	465.5	5.5	252.2732111	2.748019142	264.8	1.735	229	3	433	9	2402	11	649.676775	7.924977569	1172	48	1812	25	258.6800077	4.322636694	438.9	11.3	296.4	1.9	224.0699485	3.029595982	457.7	2.8
412	8	248.3	2.8	526	9	973	11	442	6	1722	57	260.4	3.2	2182	39.7	407	4	467.5	5.1	270.4629978	2.67060614	303.2	2.025	287	8	433	8	2401	9	727.9734326	20.85842831	1169	38	1801	39	258.7395682	4.530764724	910.4	22.6	297.9	2	224.2	3.2	459.6	2.7
415	6	249.2	2.7	529	8	970	53	956	17	1536	72	260.7	3.4	2193.4	17.4	424	4	471.1	5.5	257.2562029	4.070594643	289.9	1.88	144	2	434	9	2398	10	771.1732198	58.36683954	1112	71	1791	30	259.7	8.4	438.4	8.3	298	2	225.1	2.9	460.5	2.5
415	8	249.9	2.8	533	12	1243	122	510	35	1610	68	262.4	3.2	2198.2	44.9	459	4	474.9	5.3	475.4207188	4.012826447	290	1.91	87	5	435	10	2397.582674	13.52364487	987.2674832	19.04079556	1082	14	1789	32	260.0604444	5.7236236	924.3	22	298	5	225.8	2.9	466.2	4.75
416	7	250	2.8	539	11	1051	66	422	15	1828	59	262.9	3.5	2462.9	59	642	6	491.6	5.6	255.5210257	8.589578209	1829.8	9.135	203	4	435	10	2378	11	1060.414554	25.27495319	1069	15	1784	14	260.1851365	4.078764338	309.2	6.6	299.6	3.8	226.1	2.8	469	2.65
417	10	251.5	3.9	557	11	1292	56	461	10	1665	56	263.5	3.2	2507.4	9.5	648	5	494.5	6	286.3256573	2.946368101	282.5	1.83	88	2	436	20	2376	10	1431.44639	3.493728729	1014	21	1778	28	260.2213525	5.201792381	921	29.1	301.9	7.3	226.4	3.1	478.6	2.75
417	11	251.8	3	595	11	1267	75	422	7	1609	68	263.6	3.1	2534.2	11.3	847	9	497.3	5.6	421.0776334	4.678124604	1698.2	9.73	383	7	436	8	2364	9	1939.899139	7.481850418	1005	22	1775	57	260.421364	5.133638067	322.4	7.8	302.7	7.3	226.6	2.7	485	7
420	9	251.9	3.1	715	10	1262	65	968	17	1570	59	264.5	3	2537.5	14.2	888	8	511.6	5.5	230.9190538	2.04130072	1878.1	9.185	89	2	437	11	2362	11	2429.85372	10.2912375	996	11	1770	32	260.5302417	6.104033703	444.7	14.9	304	2.7	227.4	2.9	490	5.5
420	9	252.1	3.1	737	14	1347	87	343	10	1724	62	265.2	3.3	2554.8	14.6	956	8	522.9	6.1	313.395304	4.78010151	2479.9	8.555	33.1	0.6	438	9	2361	10	2456.240633	16.49134131	949	16	1763	66	260.5784329	5.095458199	921.3	14	304.9	2.8	227.6	2.9	508.4	3.75
421	8	252.5	2.9	741	13	1435	50	472	12	1832	76	265.4	3.2	874.7	11.4	420	4	544.8	6.3	276.0128551	3.281138167	263.1	1.73	214	3	439	11	2360	11	2506.909953	12.88114039	942	13	1757	14	260.8879105	5.020422997	431.3	11.6	305.7	1.8	228.0534814	3.090934817	621.4	4.8
422	11	252.6	2.8	766	22	1348	63	263	5	1791	59	265.7	3.4	412.1	3.3	922	7	697.6	7.9	276.3327703	5.906644212	2562.4	8.635	93	1	439	11	2359	11	2525.894769	7.049877895	929	12	1757	49	260.9	13	430.1	8.6	306	4	229.1	3	675	43.5
426	10	253	2.3	776	33	1350	54	326	6	1865	58	267.7	3.2	434.4	16.2	540	5	702.9	7.7	270.4941778	2.58913378	2557.3	8.415	375	5	439	15	2356	12	212.937929	4.731831939	922	17	1755	49	261.3	10.9	510.2	16.6	307.5	7.3	229.2	2.9	820.4	3.45
428	7	253.7	2.7	787	11	1702	49	63	3	1951	55	267.8	3.3	267.3	1.3	259	2	714.3	7.7	262.167587	2.534286809	2060.8	9.385	188	3	440	10	2349	12	229.0990493	4.961024776	898	12	1754	34	261.4	13.5	934	21.7	308.7	7.3	230	3	867.1	3.3
429	7	253.8	3.2	796	20	1565	74	943	15	1815	50	268.7	3.2	839.9	15.9	253	4	714.7	8.5	267.2012817	2.621844111	1914	9.14	284	5	440	9	2332	11	237.557319	5.021772307	888	10	1753	12	261.6295863	5.152881183	923.5	20.3	309.2	7.3	230.2	2.7	1017	25
429	8	254.1	3.1	800	18	1587	62	437	8	1884	67	270.2	3	456.1	13.9	723	6	741.4	7.8	278.7259382	2.228388794	296.9	1.925	158	2	440	10	2328.032617	73.03456032	241.2760846	11.67262156	887	14	1747	61	261.7	4.8	448.9	10.7	309.2	2.6	230.7285357	3.276908225	1026.6	4.75
431	7	254.9	2.9	814	12	1766	63	436	7	2173	48	270.3	3.5	287.9	6	235	3	803.6	9.1	294.1660812	2.698071115	1871.1	9.135	775	42	440	10	2320	9	242.412227	3.968877828	859	8	1744	46	261.7448734	3.243227554	453.3	12.6	311	4	231.0395165	2.903659262	1512	7
431	10	255.4	3	827	26	1884	59	522	8	2232	48	270.4	3.5	777.7	20.8	234	3	842.6	9.1	464.2888617	6.586305463	2366.5	8.65	326	8	441	9	2319.118585	31.07370151	257.0061495	7.47884483	830	14	1739	30	261.8341979	4.257491596	284.5	7.9	312.2	7.7	232.5320155	8.127220829	1580	65
434	12	256.5	2.9	842	15	1989	38	459	14	1981	71	274.2	3.9	432.7	22.3	450	4	875.5	9.5	133.4073082	0.964086063	1755	9.42	424	8	443	9	2313	12	268.1356582	3.393693002	809	8	1731	48	262.1607657	3.974154055	275.4	5.2	313	4	232.7	2.7	1597	32.5
435	7	257	3.5	848	20	1972	52	343	10	2229	45	274.5	3.5	440	4.7	219	2	877.1	9.1	287.8476528	4.266045078	2263	9.675	19.6	0.4	450	12	2308.044829	29.33845376	269.5464234	2.836477028	806	10	1728	54	262.1739302	3.945643822	281.1	8.6	313.5	2.2	232.7	3	1696	7
436	6	257.7	3.1	849	15	1989	85	503	8	2468	56	277.3	3.5	466.9	9.4	425	4	964.6	10.2	274.3977133	2.887455419	2422.9	8.735	19.6	0.4	451	9	2303	10	269.8393745	5.202250683	805	15	1710	34	263.2	6.3	930.6	26.4	314.5	7.4	234.4	2.9	1744	16
438	8	258.2	3.2	891	20	2032	59	273	7	2447	56	277.6	3.6	246.8	4.6	418	4	1247.7	12.4	236.9906511	2.355594113	1879.6	9.175	98	1	462	14	2299	9	271.6900179	3.170676205	801	8	1706	30	263.289592	5.584127231	910.3	14.5	315	7.5	235.1	2.9	1745	13
438	7	258.4	3.3	937	26	2280	66	267	5	2481	50	277.9	3.4	268.7	9.6	323	7	1282.3	13.2	263.6443992	1.983442068	265.7	1.925	395	11	462	21	2294.407749	32.10712951	273.775272	20.48323365	800	9	1702	12	263.3936472	4.482615572	430.2	13.8	315	4	235.3	2.9	1792	11.5
438	7	259.3	3.9	965	19	2391	50	320	5	2629	43	278.2	3.5	460.5	3.3	274	3	1452.2	12.5	269.4107123	3.085238816			198	4	471	8	2294	10	277.7292204	6.680536227	800	7	1695	51	263.5854309	4.569193373	784.1	17.6	315.1	2.3	236.3	3	1815	39
442	8	260	3.2	981	23	2399	45	423	6	101	2	281.6	3.5	307	4.3	458	4	1497.4	13.3	314.3271317	3.174445543	1696.2	9.355	134	2	476	9	2276.103452	44.04375826	278.8073382	7.154761149	789	7	1688	37	263.9667633	4.45958863	444.6	17.9	315.4	7.5	236.6	2.9	1836	13
443	7	260.4	3.1	1050	45	2363	54	262	4	104	2	281.7	3.5	428.4	9.1	427	4	1529.3	15.2	433.203071	4.512157748	2527.3	8.455	442	10	479	10	2276	10	287.7670652	3.419038325	784	10	1686	31	263.9987451	4.041841077	931.2	22.5	315.9	7.6	237.2	1.7	2579	14.5
446	10	260.8	3.2	1066	101	2498	52	365	7	127	2	282.2	3.1	439.3	11.9	739	6	1654.1	11.9	261.8218182	3.349622655	1798	10.285	277	6	493	16	2275	10	289.5609355	4.927855056	778	12	1682	13	264.0813056	7.622408042	477.8	16	316.6	7.5	237.4	3.5
447	9	261.6	3.1	1081	184	2528	47	990	13	156	3	283.2	4.2	444.1	3.2	378	3	1696	16.4	456.3223397	5.281092093	2503.8	8.535	175	3	509	15	2267	11	294.028594	3.703954506	773	7	1672	9	264.2	5.4	440	8.6	317	5	237.6	3
449	6	261.8	3.3	1151	97	2606	50	462	8	164	3	283.9	3.5	392.8	13.6	231	2	1704.5	12.2	213.470991	7.795395691	2461.1	8.535	28.8	0.7	530	11	2265	12	294.1814324	15.30064077	761	10	1661	37	264.2179514	4.276496973	279.9	5.8	318.2	7.6	238.3	3
449	7	261.9	3.6	1231	34	2437	46	974	12	205	3	284.1	3.6	314.6	4.2	221	2	1744.8	12.3	308.8015006	2.776655949	1902.4	9.12	613	10	531	21	2260	9	298.6937243	5.797542634	759	6	1657	37	264.8385392	4.323816412	446.4	15.8	318.9	7.7	238.3	1.35
450	9	262.2	2.8	1234	135	121	3	870	14	206	4	284.7	3.6	451	6.2	257	3	1776.1	21.5	331.7549982	4.944232857	2057.8	8.905	222	4	546	10	2214.037623	28.78220255	301.2355416	3.012397381	744	9	1655	49	265.1	7.1	442.2	15.6	319	2.1	238.4	2.9
451	7	262.3	3	1325	56	192	4	255	4	208	4	287.3	3.9	872.7	27.4	214	2	1827.9	14.6	257.9625051	2.987479449	1840.9	9.21	188	6	563	11	2211.164045	82.81395818	306.2909466	5.301466978	741	12	1654	12	265.3	14	333.7	6.6	319.2	7.7	238.4	2.9
451	9	262.7	3	1551	60	289	4	249	4	210	3	291.5	4.5	298.4	6	590	5	1849.7	12.4	251.3988136	30.76663392	2537.2	8.54	114	3	580	16	2210	39	310.0115745	4.884587237	728	8	1651	44	265.5620136	4.561169799	890	33	320.6	2.3	238.6	2.9
452	14	262.8	2.5	1592	213	292	5	448	9	210	3	292.4	3.6	415.2	6.4	662	6	1877.2	12	264.9788165	5.986627443	1743.9	9.47	266	4	583	15	2191	16	310.75834	5.877323573	721	6	1646	39	265.641588	5.801391718	949.5	27.5	321	7.6	238.9955212	8.498495292
452	10	263.1	3.3	1658	34	339	8	441	7	211	3	293.9	3.9	568.4	16.7	251	2	1885.7	13.1	247.0341404	5.381353218	1821.5	9.365	347	5	592	10	2187	9	331.7044511	3.326055684	608	7	1637	13	265.9100731	4.692816825	913.7	24.3	321.9	7.7	239.1	3
452	7	263.4	3.4	1687	86	381	6	881	13	211	4	294.2	3.4	255.7	15.7	405	3	1928.4	12.1	261.9421018	4.155008911	2499.6	8.52	194	5	606	15	2187	10	339.8607988	3.193090394	601	6	1627	29	265.913727	2.90785586	401.9	17.5	322	2	239.4	3.2
452	9	263.5	3.9	1750	54	396	6	440	6	220	4	294.6	4.1	409.2	6.4	230	3	1949.2	12.1	289.1221895	7.524575331	275.2	1.78	273	6	628	13	2178	41	345.2641628	16.05006422	600	6	1615	35	266.0655623	3.879307087	339.1	9.1	323.4	7.6	239.7	3.2
457	8	264.4	3.2	1778	106	407	6	326	8	223	4	295.2	3.9	275.6	4.3	399	3	1950	14.8	256.5883632	3.701798181	273.1	1.775	429	6	645	11	2150	8	347.9451069	4.927884751	570	6	1614	41	266.646321	5.743235192	419.7	12.1	323.4	2.8	239.7	2.9
459	8	264.4	2.9	1804	107	423	4	496	8	226	3	296.4	3.7	340.5	8.9	258	3	1980	11	233.0498305	4.916227607	322.8	2.085	196	3	657	23	2147.385971	38.65921849	351.8220428	7.533607088	566	10	1607	10	266.7641982	3.185571173	433.7	7.9	324.2	2.8	239.7	1.4
460	8	265	3.2	1807	86	427	5	655	17	241	5	296.8	4.1	263.3	4.1	703	9	1990.6	12.1	452.828146	5.089311976	1907.4	9.095	475	6	659	12	2143	17	367.460443	5.977637103	557	7	1606	44	266.8669219	5.100459679	948.5	29.3	324.4	2.6	239.8	1.25
461	10	265.1	3	1833	141	429	5	286	9	246	4	296.9	4.2	237.3	4.2	242	3	2088.2	13.6	225.2963797	3.400056309	1819.6	9.215	408	6	669	14	2135	12	417.443218	5.711450728	553	10	1606	34	267.108999	4.217186226	891.9	30.3	324.9	4.4	240.1	1.8
462	10	265.7	3	1849	38	429	6	491	7	261	4	298.4	4.1	504.7	12.1	247	4	2125.5	13.6	271.1373521	2.54913421	1689.5	10.625	41	1	670	15	2129	10	433.1464121	12.50434372	553	8	1603	15	267.2439061	5.37008132	935.9	25.9	327.1	2.1	240.3	3
462	9	266	3.1	1849	70	429	5	625	9	265	4	298.5	3.8	391.5	5.3	303	3	2283.9	13.4	277.8851477	7.508958577	1886	9.28	43	1	671	13	2098	10	476.4367252	5.004657609	531	11	1580	40	267.3973747	3.738436202	956.1	17.1	328	4	240.6103856	21.91215989
463	7	267.1	4.1	1872	99	435	5	408	7	265	5	299.2	3.5	331.3	8.1	593	4	2298.3	13.2	433.3284935	9.18210201	1863.3	9.65	43	3	671	13	2090	12	485.8253027	7.124057416	508	13	1578	33	268.0655588	6.405514108	431.2	17	330.1	2.4	240.7	3
464	9	267.6	3.2	1902	48	436	7	264	5	278	4	300.6	3.6	197.4	8.1	269	3	2383.5	14.2	307.4698901	6.247923517	1883.2	9.18	34.8	0.6	675	16	2080	59	486.328835	19.24633522	508	7	1573	35	268.0742717	4.602361811	308.3	10.3	331	5	240.9	2.9
465	10	267.9	3	1949	40	438	6	454	14	281	5	300.9	3.5	217	4.9	2239	60	2402.6	17	262.4180695	3.085319044	367.6	2.36	132	2	695	13	2068	11	490.5606059	6.726097878	507	7	1571	99	268.3421166	5.098836329	930.9	23.6	333	4	240.9	3.2
466	9	268	4	1997	219	438	5	469	7	284	4	301.7	4	251.3	12.6	210	2	2407.5	12.4	317.8759381	8.004577669	1924.8	9.24	361	6	709	14	2065	13	498.0409485	3.208090104	503	8	1562	44	268.4016118	4.913732695	461.1	11.6	334	4	241	2.9
466	9	268	3.3	1998	92	446	6	467	7	285	4	301.7	3.7	266.6	4.1	266	2	2459.9	16.4	283.9524839	4.194945415	2556.8	8.485	957	12	723	12	2063	12	535.9774935	5.489152348	502	10	1541	14	268.5909663	4.035425959	957.1	23.6	334	4	241.5	2.9
472	7	268.1	3.3	2026	75	447	8	787	30	292	4	303.6	3.6	451.2	7.6	395	4	2468.3	15.5	280.4670308	3.363459208	332.2	2.145	229	12	728	13	2057	12	554.2785081	11.1996557	502	9	1539	34	268.6021969	4.91927622	264.7	7.7	334.5	8	241.7	2.9
472	7	268.2	3	2029	39	448	7	317	11	298	4	306.6	3.6	213.9	11	1902	61	2471.1	13	307.9836719	4.298357999	2896.7	8.235	419	5	748	15	2035	11	564.6847789	2.546106841	502	8	1502	35	268.7886557	4.689117979	454.8	14.1	336	4	241.7	2.8
472	8	268.2	3.6	2046	90	450	6	470	7	373	5	310.2	3.7	258.8	4.6	737	5	2504	14.6	1487.70244	138.2721448	1885.4	9.705	188	3	749	13	2033.745849	55.93361432	565.2075359	4.325072147	498	4	1489	12	269	11.1	849.9	27.9	336.3	3.9	241.9	3.2
476	9	269.7	2.3	2059	45	451	9	243	7	378	9	310.4	3.7	276.5	4.9	834	6	2521.3	12.4	1647.038413	71.06079512	1646.5	13.315	718	30	755	14	2014	15	572.8214663	4.687774465	498	5	1487	58	269.1210462	4.995512644	889.9	16.1	337.7	3.9	242	2.9
478	9	270.1	3.1	2072	59	457	6	269	4	380	6	314.3	4.2	43.4	1.6	2423	30	2543.1	12.7	1779.600873	154.2168682	1914.6	9.16	194	3	775	15	2009	10	573.7722835	5.670540239	497	8	1487	17	269.5	4.7	904	28.4	337.7	3.9	242.3	3.4
478	10	270.3	3.8	2130	60	460	8	342	17	389	5	315.3	3.6	374.4	34.2	293	3	3552	13.7	1750.924045	116.0314213	322.3	2.075	388	25	779	17	2006.821101	35.9314597	587.3408086	16.5725108	494	8	1482	13	269.6107099	6.09646309	476	9.7	343	4	242.5	3.2
479	14	270.4	3.2	2143	73	467	6	283	5	392	5	316.4	3.7	465.5	24.5	2515	23	3571.6	13.5	1968.986154	70.4839977	1696.3	10.125	146	2	785	15	2006	12	946.7605993	13.3872648	492	6	1476	12	270.0256444	8.84041694	887.1	30.1	351	6	242.6	3
482	10	270.6	3.3	2244	42	468	8	281	5	393	7	317.3	4.1	1773.7	12.1	2805	93	79.3	1.2	1906.023137	20.96522289			391	6	793	14	2005	16	1147.181829	85.59417997	491	7	1466	31	270.1	9.1	913.3	28.4	351	4	242.7	1.8
484	9	270.8	2.4	2386	140	472	8	308	6	403	6	324.6	3.7	2011.3	11.3	2438	33	145.3	1.6	1625.598072	141.4168703			147	2	794	22	1993.208328	26.45069437	1182.502082	28.35653523	488	7	1460	54	270.2666367	8.392042392	399.8	14.7	353	5.2	242.9	3
485	8	272	2.5	2414	71	487	8	330	12	404	5	326.7	4	1597.3	14.2	1791	31	145.6	1.9	1696.564463	74.16819813			345	9	799	15	1983	12	1198.683086	7.536938719	485	10	1374	57	270.7070589	3.277634685	925.2	31.6	359.1	9.1	243	3.8
485	9	272.8	2.9	2466	180	487	10	280	5	405	6	329.7	4.8	1991.4	25.2	886	7	205.2	2.2	1551.689684	85.23179082			250	3	831	13	1980	27	1200.222433	4.749982229	480	8	1374	59	271	6	437.6	8.3	362	5	243.6	3.2
486	8	273.1	3.1	2477	26	488	7	186	4	410	6	329.7	4	1642.3	11.1	1307	77	209	2.3	1826.819496	47.18030332			203	3	831	13	1973	9	1331.499582	11.07556514	477	7	1342	40	271.1267816	4.966572696	853.2	26.8	364	4	243.8	3.4
489	9	274.4	3.2	2503	202	497	12	446	6	434	6	333.3	4.1	1889.2	19.3	317	5	212	2.4	1923.313692	147.1978976			406	5	839	16	1972	11	1366.587314	8.9679008	476	5	1321	46	271.2904519	5.940679112	454.3	11.8	368.7	3	243.9	2.9
490	7	274.5	3.1	2513	39	498	8	277	9	437	7	334.4	4.7	2477.3	9.7	1633	50	222.6	2.4	1339.460436	146.390923			51	2	857	15	1970.418608	1.803256804	1393.79258	23.40148389	475	7	1315	37	271.5	8.5	498.8	10.4	368.7	4.6	244.5	2.9
495	10	274.6	3.3	2582	75	504	10	441	6	441	8	334.9	4.4	1861.9	11.5	474	4	223	2.5	1981.755351	12.29276513			408	6	869	22	1970	10	1433.34803	8.968659686	473	6	1283	39	271.942115	4.397059198	463.1	12.7	374.3	4.1	244.5	3
495	8	274.7	3	2583	90	516	7	271	6	444	8	335.3	3.7	1835.1	17.8	919	7	244	2.5	1906.373501	14.19902131			156	2	875	16	1969.106073	74.92746873	1480.801866	10.58129998	473	10	1279	30	272.3295154	4.516661387	276.9	8.9	374.5	4.5	244.9	5.1
497	10	275.2	3.4	2592	33	564	11	291	6	450	7	340.2	4.1	1109	11.4	414	4	234.1	2.5	1888.69207	11.35965167			156	11	879	18	1968	10	1503.60386	8.71968816	472	6	1268	13	272.7341907	4.661074471	440	8.7	380.3	9	245	2.9
504	12	275.6	2.3	24	1	625	9	367	14	452	5	348.9	4.3	1085.4	16.3	244	3	204.1	2.5	1584.630282	260.0242313			422	6	880	14	1967.082085	2.979160095	1728.592973	4.027137526	470	7	1252	49	272.8	10.2	493.3	10.2	384	4	245.2	3
507	10	275.9	3.1	47	2	630	8	500	19	453	6	353.7	4.1	1988.5	11.5	453	4	239.5	2.6	1526.858865	121.7347117			264	9	880	19	1961	12	1754.835831	5.207327941	468	9	1250	12	273.4	6.6	764.3	22.4	388.9	2.9	245.4	3
509	11	276	3.1	100	6	668	12	536	17	456	7	358.1	4.5	2130.2	14.7	1404	136	231.7	2.7	2482.93558	14.27876177			640	9	885	22	1960.588945	24.93327635	1787.100373	13.74669381	467	4	1240	46	273.4152836	4.947053616	437.5	14.9	394.8	4.6	245.6	4
510	11	276	3.2	150	5	685	14	293	6	456	9	363.3	4.4	1987	18	403	5	259	2.7	1681.941903	94.95409466			377	6	891	15	1958	11	1791.54296	4.948066829	467	8	1234	32	273.7	6.3	442.2	10.2	398	4	245.6	3.3
516	9	276.2	3.2	169	6	698	8	442	9	456	12	364	4.1	1633.9	13.4	340	4	243.3	2.7	1828.367311	25.72548892			162	3	895	26	1957.556252	31.16384917	1795.529305	6.975722119	467	10	1229	57	274.090181	4.415006806	387.7	10.8	398.8	4.4	245.6	3.6
517	9	276.2	3.1	181	4	703	16	545	15	459	8	367.6	4.2	1968.2	17.2	379	5	232.7	2.7	1767.397927	117.6683802			324	14	913	17	1957.556252	28.70723068	1832.393867	4.32925701	466	4	1224	44	274.190371	4.142722557	893.2	26.4	400.5	3.9	246.4	3.2
519	7	276.3	3.8	215	5	710	22	706	34	461	7	368	4.7	2474.5	9.2	2177	68	233.8	2.7	1987.06687	11.44658868			163	14	914	19	1954	12	1838.523312	5.180736363	458	5	1216	10	274.7153333	5.41291581	949.5	25.6	405	4	246.4	3.1
520	12	276.5	3.3	216	4	730	10	287	6	463	6	368	4.3	2489.7	13.4	311	4	253.5	2.7	1687.583497	76.56696956			163	6	914	32	1951	11	1985.160617	3.658359802	458	6	1198	45	276.1900672	6.393999766	616.8	19.3	420.4	4.9	246.8	2.9
532	8	276.5	3.1	218	4	758	8	507	10	468	7	369.9	4.2	1692.4	24.2	797	7	259.3	2.7	2477.117386	30.99364731			219	3	916	29	1947	11	1985.761462	18.29054844	458	9	1182	13	278.7150143	7.215304534	843.2	22.9	421	4.8	246.8	3.5
534	11	276.8	3.4	222	6	793	17	292	4	497	8	371.6	4.5	1854.8	18.2	1811	98	268.2	2.8	2058.427929	16.24580744			384	6	925	17	1945	11	2279.706524	58.80616045	458	7	1175	45	280.4	10.1	879.8	24.8	421.6	4.9	246.8	1.8
565	15	277.3	3.3	224	5	811	13	547	12	503	7	377.1	4.6	1965.9	10.3	1921	73	263.9	2.8	2468.531717	31.63636963			389	7	935	16	1942.176303	13.27893871	2322.41016	11.51217788	456	3	1166	39	281.3064735	6.534320314	880.8	19	425	4	246.9	2.9
570	13	277.5	3	225	4	830	8	310	5	550	7	377.3	4.5	1749.2	18.4	1250	41	259.8	2.8	2495.510524	34.00079775			341	5	940	17	1941	10	2387.05702	9.869077438	456	8	1159	12	284.5	9.1	854.8	24.3	425.2	5.1	247	3.1
595	9	279.2	3.5	226	5	901	20	452	7	606	7	378	5.1	1856.1	13.2	2401	35	239.6	2.8	1607.317518	71.08628014			229	4	945	20	1941	9	2476.584591	15.16041886	456	7	1158	14	284.6	8.1	594	15.1	427	4	247.6	3.1
606	15	279.4	3.4	233	4	912	11	240	3	656	9	379	4.6	1633.3	12.7	272	3	260.5	2.8	1663.169719	73.29234425			459	8	962	27	1939.909837	30.31406186	169	2.2	455	6	1131	45	286.2347609	5.399052425	741.2	16.8	427.9	5	247.9	3.2
609	17	279.4	3.1	233	4	913	22	282	5	668	12	379	4.3	1899.3	12.5	2447	91	239.7	2.8	1656.032485	71.4983269			402	6	978	18	1939	9	206.8	2.7	455	7	1130	15	286.9	11.1	918.7	20.4	429	5	247.9	3.2
630	10	281	3.2	233	5	946	15	758	17	787	10	381	4.2	1388.7	10.9	355	4	244.1	2.8	2308.742652	31.53828764			717	22	984	16	1935	10	215	2.4	454	4	1114	54	287.4	2.3	922.7	31	431.6	5.2	248.1	3
636	11	281.1	3.4	234	6	1155	81	965	138	790	12	381.9	5	1751.9	12	415	5	266.4	2.8	2116.336868	13.51626446			481	10	993	20	1927	13	216.5	2.6	454	12	1110	30	288	6	462.6	12.1	439	5	248.4	3.2
658	10	281.5	3.1	234	4	1291	69	1221	88	794	11	384.9	4.3	2150.2	30	374	4	264.4	2.9	2337.231557	39.65515786			42.7	0.7	993	19	1927	41	217.5	3.2	453	4	1106	16	289.7774611	6.005626448	471.7	14	439.3	5.1	249.1	3.7
669	10	282	3.1	234	5	1324	63	2489	32	833	10	386.5	4.8	1952	16.1	1730	61	263.4	2.9	1927.712131	11.12269441			36.6	0.6	966	76	1921	11	218.8	2.7	452	5	1096	12	300.2855616	5.269900856	334.6	11.7	441	4	249.1	3
684	10	282	3.1	240	8	1214	84	1851	67	855	10	388.8	4.4	1885.2	19.3	264	4	240.6	2.9	2555.053091	18.32813263			249	4	1119	86	1917	11	220.2	2.7	452	7	1079	14	304.4	9.3	760.4	15	444	5	249.2	3.1
686	15	282	3.3	246	4	1213	62	1514	26	876	12	389.3	4.9	2264.4	36.7	781	7	248	2.9	1595.079916	123.5168118			189	8	1054	442	1916	16	221.4	2.6	452	9	1038	13	313.9	7.5	721	22.9	445	6	249.2988621	8.2475434
689	21	282	3.3	249	14	1465	80	2250	84	882	10	395.2	4.7	2255.9	13.4	1685	58	262.7	2.9	1770.020611	94.4587372			631	14	1220	140	1916	11	225.3	2.7	451	6	1036	16	314.3	26.9	907.8	14.2	448	4	249.3	2.35
704	10	282.6	2.3	250	8	1496	67	1672	103	886	15	395.4	4.7	1874.5	18.3	1688	47	260.9	2.9	2491.660354	13.42136733			190	2	1233	62	1913	11	225.8	2.6	451	6	1012	15	316.8	5.6	441.7	10.2	449.4	5.8	249.4	3.2
715	11	283	3.5	254	6	1528	50	1996	32	926	12	399.1	5.5	1268.7	12.1	440	4	268.9	2.9	1925.986865	35.20712105			381	7	1142	87	1912	10	229.2	2.7	449	7	1003	14	322.1568508	4.971986594	314.4	10	450	5	249.9	3.5
722	11	283.2	3.9	254	5	1702	46	2487	30	941	13	399.6	4.8	1878.8	16.4	1643	47	250.2	3	1743.41151	119.1613592			447	7	1245	112	1911	12	229.6	2.7	448	6	994	14	322.9	9.1	333.9	9.4	451	6	250.3	3
732	15	283.4	2.6	255	8	1666	28	2542	24	947	10	399.7	4.8	1882.6	10.1	274	3	273.1	3	1962.032495	15.12498328			323	6	1304	74	1910	12	230.5	2.8	448	5	993	12	328.5725085	31.35691761	818.3	30.8	451.3	5.2	250.6	3.7
741	15	283.6	3	255	7	1791	60	1657	81	955	14	400	6.3	2226.9	27.2	1703	107	253.4	3	2538.201479	11.33389945			195	7	1277	57	1908	8	231	2.7	447	8	991	13	329.4387558	4.940554503	457.8	9.4	454	5	250.6	1.95
742	13	283.8	3.3	256	9	1929	56	2545	22	980	13	400	4.6	2530.6	10.9	234	3	272.6	3	1628.087698	70.48550732			39.1	0.5	1260	49	1904.810682	6.221458516	231.2	2.7	447	8	982	11	333.3	3.5	793.5	22.9	454.1	5.5	250.7	3.3
745	14	284.3	3.1	256	8	1791	27	1253	44	995	13	401.9	4.7	2416.9	65.5	1760	126	283	3	2476.442084	12.97732605			261	4	1352	74	1898	13	231.4	2.9	445	7	979	8	339.6245244	28.0542052	776.8	30.6	455.6	5.4	250.7	3
746	12	284.9	3.1	257	7	1791	53	2676	38	1287	77	404.1	4.8	1682.6	12.3	406	4	268.2	3	1777.770951	49.78389856			588	8	1577	79	1893	31	237.4	2.9	444	7	978	9	343	9	487.1	12.9	459	7	251.7	3
756	12	285.2	3.8	258	6	2073	44	1774	42	1351	78	404.9	4.5	1686.7	10.3	1866	100	279.9	3	1969.132427	110.0523781			400	11	1604	129	1892.831575	32.51908192	240.5	3.2	444	8	971	7	347.7	8.4	442.6	8.9	463	5	251.8	3.8
758	10	285.4	3.4	260	9	2220	37	1766	36	1383	86	405.5	5.1	2375.3	37.4	1740	95	278.4	3	1795.252981	67.67157241			270	5	1642	260	1892	12	240.7	2.9	443	6	971	15	349.1024685	6.040388682	694.1	20	464	6	252	3.2
762	19	285.4	3.5	260	5	2050	58	1030	60	1521	64	405.6	5.1	2347.1	64.7	247	2	281	3	1682.19038	134.8153299			68	2	1561	89	1888	11	242	2.8	442	4	968	12	353.5	7.4	392.4	9.7	465	5	252.3	3.4
767	13	285.5	3.2	260	7	2240	51	2095	38	1843	58	405.7	5.9	1279	60.5	393	3	274.7	3.1	2533.83054	17.09948949			616	31	1558	67	1886	10	249.9	3	441	8	965	13	353.8	8.6	435.2	10.8	466	4	252.4	3.3
770	18	286.2	3.3	262	11	2416	45	1450	987	1854	53	406.1	4.6	968.2	23.2	446	4	295.6	3.2	1963.520438	17.47027863			487	11	1698	70	1886	18	251.3	3.2	440	5	950	11	356.894888	6.94830058	298.8	6.2	471.8	8.8	252.5	3
796	12	286.8	3.9	263	6	2360	50	1565	41	1933	78	406.7	4.8	480	11.3	277	6	279.8	3.2	2384.753558	26.59229841			141	2	1553	89	1885.045646	28.28558979	252.8	3	440	6	949	9	361.4880776	7.280389542	349.1	10.7	475	7	252.5	3.2
806	11	288	3.2	265	5	2749	46	1841	54	2120	54	407.2	4.9	445.5	6.3	225	2	277.5	3.3	2610.484396	22.13003502			212	3	1668	82	1885	7	255.4	3	439	6	947	9	361.8892178	6.2584123	373.1	8.8	480.6	5.6	253.3	1.7
807	14	290.6	3.5	265	5	2569	50	1184	32	2146	55	408	4.7	937.7	17.9	229	2	314.5	3.3	1779.581029	90.81781054			213	3	1749	65	1885	10	259.8	3.1	438	7	945	10	362.1005453	7.216013122	346.8	12.6	491	6	254.2	3.4
828	12	290.8	3.4	267	5	2469	50	2405	47	2391	49	408.7	4.9	759	10.6	2494	35	279.1	3.3	2593.661581	27.86003078			214	3	1915	77	1883	10	263.7	3.1	436	4	939	10	362.5954274	5.921603464	755.8	24.9	499	6	254.9	3.3
832	12	291.3	3.5	267	7	271	5	1802	74	2415	60	409	5.4	947.3	18.5	2508	29	294.1	3.3	1885.663271	26.2668668			145	2	1886	54	1883	11	267.1	3.1	436	7	939	13	362.7368048	7.202052943	797.1	31.7	508	6	254.9	3.1
847	14	291.8	3.3	269	7	209	3	1825	55	2450	55	409.2	4.8	444	10.8	2189	53	274.4	3.3	1980.236782	7.5394143			290	5	1871	52	1881	11	273.7	4	434	7	935	7	365.065775	6.103589921	286.7	6.8	513	6	255.1	3.1
848	13	292.3	3.6	270	6	317	7	1613	95	2465	47	409.4	5	485.2	7.4	262	4	268.9	3.4	1791.012945	37.17356207			363	5	1951	51	1879	8	274.2	3.5	433	4	932	10	366	5.7	194.5	6.9	513	7	255.1	3.3
854	16	292.4	3.3	271	11	449	6	1071	62	2510	59	410	4.6	443.4	12.2	297	4	266	3.4	2560.866612	21.48530877			436	7	2035	77	1879	12	274.7	3.2	431	6	925	11	366.1405289	6.570986123	1137.949939	9.142149724	524.5	14.4	255.2	3.8
857	15	292.7	3.1	271	11	286	4	2826	38	101	2	411.3	4.7	261.8	4.2	444	5	294.2	3.4	2517.174154	14.55975993			36.5	0.9	1792	51	1879	10	275	3.3	430	6	923	9	366.251994	7.045049357	1495.249124	8.597818947	589	6	255.2	2.35
859	14	293.1	3.3	273	5	247	5	1396	58	104	2	413.3	4.8	459	4.8	273	4	300.2	3.4	2445.503829	27.5130391			292	7	1912	83	1879	11	275.7	3.2	430	8	917	10	366.390043	6.106330803	1235.047566	17.31576431	723	6	255.6	3.6
866	17	293.2	3.5	273	8	438	7	1918	68	127	2	413.4	4.9	472.3	14.9	276	4	328.7	3.5	1935.5922	11.58834496			149	4	1825	129	1879	11	277.5	3.8	429	5	916	15	366.7	16.7	1584.584031	9.603219435	747	25	255.7	3
882	14	293.2	3.7	274	7	457	6	2363	121	156	3	414.7	4.7	483.2	13.3	1855	45	278.6	3.5	1924.693511	12.91686935			901	13	1867	53	1877	11	278.4	5.6	428	4	912	7	367.4871599	6.087216511	1849.146722	7.017190757	755.6	8.7	255.9	4
882	13	293.2	3.3	277	15	823	11	2475	29	164	3	414.8	5.3	252.7	4	429	4	291	3.5	2388.430108	16.66930708			697	32	1927	103	1876.276528	35.65990627	279.6	4.2	428	6	912	13	367.5205593	6.412613176	1790.980163	19.3571454	767	8	256	3.3
892	13	293.7	3.5	277	6	465	6	2407	44	205	3	415	4.6	291.1	14.8	289	3	263.1	3.6	1818.470187	39.30352627			389	12	1918	75	1874	9	281.8	4.5	428	6	909	20	367.9	12.6	1876.267825	13.35022597	798.4	9.1	256.1	3
916	21	294.6	3.7	288	8	426	7	1021	55	206	4	415.8	4.6	407.9	12.9	2556	45	333.9	3.7	1841.960318	132.8287207			313	5	2020	107	1874	11	283.1	4.2	427	5	909	8	368.1259345	8.057491045	1747.475675	7.454008354	806	8	256.4	3
928	13	294.9	3.9	290	7	443	7	1747	30	208	4	416.2	4.8	453.2	18.8	441	4	369.5	3.8	1889.376634	21.43058781			404	6	1880	43	1873	12	283.3	4.9	427	7	908	12	368.3187975	5.367183471	1405.676529	31.57605297	845.6	9.3	256.7	4
928	14	295	3.4	291	17	451	6	1311	52	210	3	418.4	5	511	6.9	1775	99	290.7	3.8	1997.095796	49.21282737			243	8	1919	95	1872	10	283.7	4.1	427	8	902	10	369.9915612	10.47071134	1237.423231	15.428231	884.3	9.4	256.9	4.2
930	13	295.5	4.4	291	6	485	8	1055	40	210	3	419.2	4.8	444.5	10.4	2514	36	348.7	3.9	1813.620276	75.63819995			16.2	0.3	2001	195	1867	8	285.8	4.1	425	7	874	10	371.2290824	9.401759913	1761.652819	7.837980912	902	7	257.3	3.3
932	13	296	3.6	295	7	450	8	1832	54	211	3	419.6	4.6	990.4	14.1	248	2	290	3.9	1646.872128	51.74357958			407	6	1790	63	1867	11	286.9	4.8	423	5	870	10	371.8275382	6.907355966	2530.073104	6.858254879	906	10	257.8	4
940	12	297.1	3.6	297	5	946	12	2586	67	211	4	419.6	5	450.8	11.9	473	5	356	4	2419.107371	19.83417292			331	11	2019	93	1866.03257	28.43782178	288.7	4.7	422	7	869	8	372.2349655	6.895077432	1381.339938	14.96244846	910	10	257.975644	8.245457895
942	15	297.4	3.6	301	5	862	14	2190	67	220	4	419.9	5	817.7	19.5	260	3	321.8	4	2425.964154	21.7620496			337	8	1891	58	1866	11	289.1	4.7	415	5	867	11	374.0172998	8.236036796	1574.539654	12.96537442	924	9.9	258.2	3.5
950	14	297.4	3.4	307	9	526	7	2023	32	223	4	420.3	4.8	984.2	10.5	678	6	406.3	4.1	1609.762647	126.2638795			85	1	1982	136	1865	12	289.1	3.6	415	7	866	7	374.0369745	7.536459975	1534.816322	12.46770916	955	10	258.2	1.85
951	13	297.7	3.6	308	9	183	3	1301	110	226	3	420.5	5.5	798.8	8.5	245	8	409.4	4.2	2391.479075	49.09431001			170	3	1878	126	1864.127723	4.713542721	289.4	4.3	414	7	860	10	374.3555695	5.945532663	1858.878456	12.08767359	969	10.2	258.2	1.85
967	17	298.8	3.6	308	10	802	13	1884	39	241	5	421.9	6.9	307.9	6.1	2462	35	400.5	4.2	2325.950164	80.13962897			340	7	1768	137	1859	39	289.9	5.5	413	5	858	9	375.635064	4.982726933	1784.244686	35.61189315	976	10	258.3	3.5
979	15	299.7	3.8	309	14	452	8	2346	49	246	4	423.9	5	237.1	4.5	516	5	407.1	4.3	2001.451145	11.43269312			344	5	2155	50	1858.528419	5.686696005	290.7	3.8	412	5	853	10	375.9923463	6.937505974	1793.742079	8.890248481	977	7	258.3	3.1
981	16	300	4.1	310	19	290	5	1693	105	261	4	424.1	5.1	440.7	6.8	1950	45	423.9	4.3	1921.574054	36.70056108			259	4	1934	83	1858	10	291	4.3	411	8	850	9	376.3497514	5.906688499	1562.90653	17.61985526	1125	22	258.4	2.3
993	15	300.6	3.6	312	5	396	6	1798	76	265	4	424.9	4.8	234.3	5	398	3	410.7	4.4	1637.130334	39.88139629			699	13	1816	138	1855	11	291.3	3.7	410	3	847	7	376.4947955	6.356401305	2372.827661	22.58959592	1244	62	258.5	3.2
996	17	304.6	3.8	318	9	844	12	2522	55	265	5	425.2	5.3	446.2	2.3	302	5	418.4	4.4	2126.423408	16.16720102			175	3	2006	49	1855	8	291.4	4.5	408	3	844	8	376.6765418	5.806567476	1860.936494	9.316955188	1274	17	258.8	3.8
1036	56	305	3.6	345	6	438	6	2485	40	278	4	425.6	5.1	457	3.7	1420	98	421	4.4	2539.098096	15.25518554			265	5	1934	53	1855	12	291.6	5	402	3	839	9	376.697388	2.938881847	1512.780279	17.90401778	1360	155	258.9	1.9
965	84	305.2	3.4	350	11	897	15	2481	49	281	5	425.9	5.2	325.8	7.3	1824	84	410	4.4	1841.374421	25.1393519			89	2	2261	76	1853.805093	37.1019854	291.7	4.3	398	6	838	11	377.2923246	9.487093576	1854.462445	16.43375499	1463.3	9.4	259.2	3.2
1083	90	305.5	3.3	366	7	449	6	1673	60	284	4	426.4	5.2	232.4	12.6	1782	138	402.4	4.4	1720.668337	39.47276396			179	3	2024	59	1852	11	291.8	4.1	398	6	836	9	377.3802295	6.811728539	1665.931732	13.74302871	1505.7	10.3	259.7	4
1170	49	307.4	3.4	367	7	461	8	2433	39	285	4	427.2	5	465	7.3	924	8	424.3	4.4	2132.84281	24.12631111			270	5	2368	95	1850.271325	12.42291799	292.2	5.2	397	12	830	8	377.929067	8.048621796	1444.439432	14.63938774	1539	32	260.4	3.1
1206	94	307.5	3.6	368	6	464	7	1744	48	292	4	427.3	5.3	278.4	4.2	251	3	440.4	4.5	1792.429755	62.91537901			9	0.3	2169	52	1850	15	292.4	3.9	395	5	826	7	377.9460216	6.423760705	1973.309541	7.533302279	1552	52	260.4	3.3
1228	82	308.3	3.7	369	7	472	7	1692	54	298	4	427.5	4.9	226	4.9	1111	80	413.3	4.5	2557.343164	9.939471908			453	7	2546	62	1848	14	292.6	3.8	395	8	821	12	378.3404532	8.938340564	1519.343379	17.36712222	1567	12	260.7	4
1156	163	308.3	3.6	372	6	815	11	1033	42	373	5	427.5	5	409.5	7.3	266	3	423.7	4.5	1936.804202	19.02114771			183	4	2595	61	1847.931219	6.911504544	293.5	3.6	394	4	818	7	378.4964881	4.540240166	2404.313991	34.44944039	1570	8	260.9	3.8
1161	76	308.3	3.7	375	6	269	6	2197	59	378	9	427.7	5.1	445.7	8.4	2475	100	418.8	4.5	2497.274567	13.89443546			275	5	2322	43	1844	11	293.6	4.3	394	4	814	9	378.509302	11.18782765	2504.354307	8.396466022	1573	9	261.3192842	9.111299871
1357	93	308.6	3.5	376	6	443	6	1919	52	380	6	428	4.7	439.2	10	2471	37	435.4	4.6	2073.543335	34.09868836			187	4	2279	70	1844	11	294.4	5	394	6	812	11	378.6887034	5.436334402	2578.595025	10.34644366	1583	14	261.4	3.1
1442	66	308.6	3.8	377	8	946	17	2607	52	389	5	429.5	5.2	798.8	5.5	413	4	444.1	4.6	1951.978231	45.81215839			374	9	2368	46	1844	30	294.4	4	392	4	807	6	378.7	19.8	1747.352765	9.587503412	1592	11	261.8	4.9
1394	71	308.7	3.6	379	11	875	17	1975	38	392	5	429.6	5.3	439.1	2.2	323	3	433.1	4.7	2480.148359	11.84429245			377	7	2437	77	1842.563893	16.03774139	294.7	5.8	391	9	807	9	378.9995931	5.286695313	1825.966509	12.39115656	1624	44	262.1	2
1365	65	308.9	4.5	381	9	452	6	1179	45	393	7	429.8	5.3	651.9	27.5	1959	42	461.2	4.7	1796.61259	132.0114938			189	3	2414	55	1839.74934	10.29034816	295.2	5.6	389	5	806	9	379.4308477	7.216625721	1541.60771	8.942278948	1625	13	262.1	2.2
1447	53	309	3.4	382	8	449	8	1919	53	403	6	430	4.9	444.5	14.6	470	4	449.5	4.7	2450.856499	13.29398134			191	3	2534	51	1837.459678	16.57152296	295.3	3.3	388	6	801	7	379.7283014	7.18314936	1842.575462	15.45731684	1638	11	262.4	4.4
1561	64	309.1	4.5	385	8	440	6	2068	38	404	5	430.3	5.5	275.5	3.3	2539	62	459.8	4.7	1933.236232	56.3891108			193	3	2232	65	1837	12	296.6	4.8	387	8	801	10	379.9125519	12.23256076	1648.866899	9.942607212	1640	32	262.6	3.8
1425	46	309.9	3.5	386	6	438	7	1788	25	405	6	430.4	4.9	260.1	3.2	1849	47	440.4	4.8	2096.206025	24.81170682			194	3	2610	72	1836	14	297.6	3.6	383	5	800	8	380.4262264	6.271901189	1899.40341	6.674408321	1642.2	14.1	262.7	3.3
1490	82	309.9	3.8	389	8	417	6	1957	89	410	6	430.8	4.8	763.7	12.1	154	1	427	4.8	1854.167679	89.56242934			388	12	2520	78	1835.553669	13.02313622	298	3.7	382	4	800	11	380.7817973	6.240005982	2016.329289	6.084555938	1648	10	262.8	3.2
1393	57	310	3.7	394	9	757	10	1734	46	434	6	431	5.1	275.6	4.9	2483	96	439.4	4.8	2432.545941	73.68620953			195	3	2668	52	1834	10	298.2	6.1	382	5	799	10	381.5124317	6.921505092	1308.671679	12.65874745	1665	10	262.9	3.1
1544	226	310.1	3.6	401	9	953	13	2063	35	437	7	432	5.3	234.3	18.8	2410	109	426.8	4.8	1627.90057	85.32842356			395	5	2583	52	1833	13	298.7	3.4	382	6	786	9	381.8921016	5.896191954	1695.40486	14.76745565	1678.9	6.2	263.1	2.35
1418	84	310.4	3.9	409	8	892	11	2419	39	441	8	432.3	5.5	307	5.2	419	4	468	4.9	1919.529461	12.76497237			200	2	2278	151	1832	9	299.4	3.6	381	4	781	8	381.9085136	5.879968617	1805.13293	14.24254458	1679	10	263.7	3.3
1421	100	311.6	3.6	411	10	289	5	1641	46	444	8	432.9	5	442.3	12.2	312	6	474.1	4.9	2465.993035	45.38431358			202	3	2499	67	1831.110747	7.702660336	302.5	3.8	377	3	781	14	382.3454154	7.378949524	1914.220549	7.961215554	1693.5	10.4	263.8	3.5
1500	82	311.9	3.9	412	7	272	5	1350	50	450	7	433.7	5.6	20.6	0.4	707	6	449.8	4.9	2428.007246	11.45442119			406	7	2605	73	1831	10	304.4	3.6	377	4	780	7	382.7905826	7.025837143	2614.819117	8.092856799	1704	10	264.2	3.7
1450	53	313.2	3.5	417	9	252	4	2510	34	452	5	434.2	5	280.4	8.1	374	4	463.6	4.9	1953.613573	12.39374891			408	7	2954	121	1830	35	307.2	3.8	374	4	775	8	382.8864811	13.54243303	1072.267873	11.90483331	1713	46	264.8	3.4
1539	191	315.1	4.4	418	9	251	4	1809	52	453	6	436.9	5.4	263.4	4.7	1690	36	477.3	4.9	1975.994381	17.64958052			409	6	122	22	1829	7	308.7	3.7	373	3	775	8	383.4410983	6.494422505	1880.610428	9.134546069	1716.4	17.1	265	4.3
1536	102	315.1	3.8	418	18	459	6	1390	41	456	7	437.6	6	325.2	4.4	2395	46	472.7	4.9	2383.426797	12.71958125			410	7	161	4	1829	7	309	3.7	373	6	772	8	383.7210478	16.81984743	2286.686701	18.10180677	1718	11	265.2	3.8
1498	44	316.3	4.2	420	19	442	7	1465	35	456	9	437.8	5.6	935.5	17.2	298	4	449.4	4.9	1953.211889	14.35962558			206	5	165	9	1828	11	309.9	3.6	371	8	772	8	383.808457	14.19791261	1479.178591	11.68366517	1721.1	6.7	265.5	3.3
1562	132	316.4	3.5	420	7	428	6	1707	87	456	12	438.4	5.8	424.9	13.1	2361	48	477.4	5	2516.405771	22.03784961			414	7	210	7	1827	16	310.8	4.2	368	3	767	8	383.8370571	6.052345506	2443.945227	20.51205697	1724	11	266	4
1470	56	317.3	2.8	421	7	823	11	1599	65	459	8	439.1	5.7	249.3	10.9	2426	46	332.3	5	1970.575858	18.26728749			105	4	213	5	1823	15	311.4	4	368	5	765	10	384.026374	5.598139926	2596.087015	7.294593816	1734.7	14.6	266.1	2.25
1855	42	318.8	3.4	421	19	467	8	1491	107	461	7	440.2	5	244.2	16.3	1599	200	451.7	5	1854.629593	10.93083173			741	9	215	7	1811	10	311.9	3.9	366	5	763	8	384.3258893	8.212798184	2554.516544	12.30189466	1735.7	12.2	266.5170574	8.367114293
1776	38	320.5	3.6	422	7	447	6	2485	51	463	6	440.7	5.7	467.9	5.4	2564	69	458.9	5	2427.193136	15.67788186			539	15	227	7	1810	11	314.5	3.7	366	6	763	12	384.6310525	7.54690369	1378.979987	12.15141981	1737.9	12.8	267	3.5
1779	34	320.9	4.2	422	27	296	5	1379	50	468	7	446.6	5.2	288.7	5.4	397	7	454.3	5.1	2055.946324	31.93639057			217	3	230	5	1809	12	316.6	3.8	366	6	762	12	384.7203172	6.936672532	1068.333697	15.30054464	1748	10	267.3	3.4
1772	66	324.2	3.6	422	8	430	6	2541	41	497	8	446.7	5.5	305.9	8.8	229	2	470.6	5.1	2448.172658	11.01441577			543	7	231	5	1808	10	317.6	5.5	363	5	761	10	385.6448149	7.181349616	2266.71831	25.52081687	1751	13	267.4	2
1797	96	325.8	3.9	423	9	815	11	2543	36	503	7	446.8	5.1	269.3	5.6	274	3	493.9	5.1	2425.888616	46.36614536			438	7	232	5	1806.572375	21.33327658	318.3	4.7	361	3	759	10	386.8751146	9.449298982	1194.294224	34.97565958	1757	25	267.568478	3.947614013
1886	109	327.2	3.6	425	10	942	12	1500	68	550	7	447.5	5.7	746.7	14	2147	49	462.5	5.2	1933.561198	18.63367696			438	7	232	6	1806	11	318.6	3.7	360	3	757	9	387.0719992	15.5718685	2613.318414	3.617913379	1758	13.3	267.6303209	5.246286753
1842	44	327.5	3.9	426	13	791	10	1182	145	606	7	447.8	5.3	284.8	8.1	2035	25	466.4	5.2	1981.555776	16.4690274			449	10	232	5	1802	14	319.6	3.9	360	5	754	10	387.4505286	6.934159481	1126.799586	72.21720921	1761.5	7.1	267.8	3.6
1780	82	328.1	3.6	428	9	259	5	2444	50	656	9	448.9	5.2	466.2	5.3	1892	27	470.6	5.3	1803.415431	34.7951193			234	4	234	5	1799	40	319.7	4.2	360	4	752	9	387.5407834	7.428062268	1951.561208	23.32866845	1765.1	8.6	268.2	3.4
1907	64	329.2	3.8	428	13	479	7	1735	48	668	12	449.5	5.4	502	47.9	198	2	453.7	5.3	1590.22787	160.7699588			710	9	237	7	1798.575535	31.72688243	320.7	3.7	359	7	750	7	388.7878931	6.033921425	1914.389141	11.31409525	1767	12	268.4	3.5
1852	47	329.7	3.6	430	8	834	12	2590	49	787	10	450.4	5.5	116.4	3.2	469	5	521.7	5.3	2459.436173	14.89991781			237	4	238	5	1797.353739	13.46946004	322.7	3.7	355	4	749	7	388.9057703	7.445593883	1873.846078	6.058328342	1767.1	7.5	268.434225	8.304782775
1870	41	331.8	2.4	432	8	823	11	1119	49	790	12	451	7	467	10.3	1825	75	498.5	5.4	2531.927994	13.29741934			239	3	238	7	1788	45	323.5	3.9	353	5	748	8	389.1458804	7.133075278	1183.979817	13.18990683	1772	11	268.6	3.3
1738	42	332	3.6	434	14	463	6	1194	186	794	11	452.6	6.1	484.4	9.5	358	4	503.2	6.1	2569.498311	10.68762268			360	27	239	6	1780	9	324.2	4	353	8	746	8	390.3	6.1	2067.441273	27.94758717	1775	12	268.7	3.2
1861	48	334.1	3.7	435	12	462	8	1900	63	833	10	453.1	5.3	238.8	15.7	127	4	543.6	6.2	2157.151451	9.440150062			363	12	239	8	1776.832568	44.48475266	326.9	4.1	352	8	740	7	390.8779418	7.261923748	1159.448464	16.74832741	1779.8	11.3	268.7	3.2
1911	52	335.4	3.7	435	10	437	6	1097	61	855	10	455.4	5.3	275.3	4.2	188	2	594.9	6.5	2231.561646	12.97492042			12.1	0.4	240	6	1776	50	328.5	4.1	351	8	739	8	392.1	20.8	1203.353689	20.03390292	1781	11	268.9	3.7
2063	67	335.7	4.3	437	8	203	3	1128	129	876	12	456.4	5.9	1302.7	43.6	200	2	316.7	6.6	2510.498618	10.10454277			872	47	242	11	1775	18	329.7	3.9	351	5	738	10	392.387945	8.252236837	1469.040422	7.694839475	1783	11	269.1	3.3
2112	81	335.7	3.6	437	8	297	5	2315	42	882	10	458.3	5.1	1468.5	10	216	2	481.8	6.6	2525.176597	13.38119569			251	5	243	9	1774	11	330.4	4.5	349	5	728	10	392.8	8.7	1327.988266	10.22288408	1783	11	269.3	3.7
2157	78	338.2	4	438	11	283	5	2489	42	886	15	459.9	5.2	1153.3	13.2	219	3	662.8	7	2345.267241	11.67712275			126	2	244	10	1774	10	331.7	3.9	349	7	726	7	393.0209028	5.749045339	1740.410401	12.27161942	1789	12	269.5	5.4
2101	66	338.4	3.7	438	15	276	4	1924	41	926	12	461.2	5.4	1639.5	13.9	225	2	697	7.3	1987.876409	7.964149093			255	4	244	6	1772	11	334.1	4.4	348	8	722	7	393.4758434	5.13180236	2298.829555	27.49525019	1791	12	269.7	3.5
1972	53	338.4	3.7	439	13	460	6	1841	38	941	13	461.2	5.6	2171.1	22.3	226	3	678.1	7.4	2487.455312	26.72034489			384	5	244	5	1771.595778	11.05343431	337.4	4	347	4	720	5	395.4851797	6.355626089	265.6812227	10.01170396	1793	27	270	3.6
2325	51	339	3.7	440	9	441	6	1177	88	947	10	463.2	6.1	1856.8	9.4	227	3	745.1	7.5	1700.344296	22.98225691			13	0.3	244	6	1771.498845	6.017529841	339.4	4.3	345	5	720	7	395.6009599	11.71470089	407.4570515	11.08763148	1793.1	11	270	3.3
2022	41	339	3.6	440	20	262	4	1179	52	955	14	463.4	6.2	1011.3	12.1	235	5	750.5	7.6	2484.894418	15.61601947			914	21	245	6	1770.45411	6.316586607	340.8	4.5	344	3	711	11	395.7828763	6.70751787	278.8892421	4.846475226	1795	56	270.7	4.5
2356	91	339.4	3.5	441	10	422	5	1893	153	980	13	465.7	5.2	1328.6	14	236	3	746	7.6	1880.353468	42.88343472			392	6	246	7	1768	53	340.9	4	343	7	705	7	396	31.6	305.8673861	5.747509244	1795.9	14.6	270.8	3.6
2409	59	339.5	3.7	442	10	312	7	2489	74	995	13	471.2	6.1	2346.6	28	237	2	783.5	7.8	1877.891103	18.44797436			394	5	250	7	1768	13	341.1	4	341	3	705	10	396.3431887	7.112085392	364.8802518	6.001552506	1796	14	270.9	3.3
2110	34	340.6	3.9	443	8	885	11	1436	54	1287	77	478.7	5.7	1733.8	12.7	244	2	722.3	7.9	2708.889222	11.99225195			263	3	259	6	1767.808107	32.92131521	342.1	5.1	341	6	700	7	396.4847203	7.080072719	468.1509156	34.30713949	1798.2	15.9	271.0307687	5.491602662
2135	52	342.2	3.9	445	7	442	7	1439	193	1351	78	480.1	5.8	2169	30.1	246	3	797.5	8	2400.008859	13.9810801			132	3	260	9	1766	11	342.2	4.2	341	8	699	7	398.2314496	5.859160767	287.0481466	15.37242232	1801	12	271.2	2.05
2267	55	343.3	3.9	445	8	428	6	2446	104	1383	86	481.2	5.4	2690.4	9.8	247	3	760	8	1816.551269	40.56236875			662	17	260	8	1763	12	344.5	4.7	340	6	695	6	398.7406518	6.151580215	951.8280669	12.67032404	1803	11	271.3	3.3
1981	71	343.6	3	445	7	892	12	1412	75	1521	64	482.9	5.4	1325.3	13.5	252	3	788	8.2	2504.800794	19.9036717			399	5	263	6	1762.65215	23.39176797	344.9	4.5	339	6	695	6	399.3	9.6	299.3581732	2.84424852	1805	13	271.3	1.75
1996	113	343.6	4	445	12	406	6	2453	118	1843	58	483.8	5.3	2433.9	10.4	253	2	759.4	8.4	1804.315276	121.4576632			400	7	267	9	1760	11	345.1	4.2	338	6	693	7	399.7137413	6.606213139	279.6895647	4.165084107	1806.8	7.6	271.4	3.6
2433	90	344.2	4	447	10	955	12	2234	118	1854	53	485	5.9	1902.3	15.1	254	3	876	8.5	2455.512702	10.97467983			268	5	270	5	1759	14	346.2	4.1	338	6	692	7	399.8582315	6.391378398	320.0744658	3.52060588	1808	12	271.9	3.4
2118	49	344.2	3.9	451	13	440	6	1252	125	1933	78	486.4	5.3	2260.7	11.5	258	3	884.7	8.8	1949.357988	15.84835813			135	3	270	21	1758	11	348.1	4.5	337	6	691	6	400.0953381	10.11626568	451.6641451	8.61914905	1810	12	272	1.5
2143	31	346.4	3.9	452	10	240	3	1207	67	2120	54	488.9	5.6	1575.8	12.8	259	4	875.9	8.9	1955.320207	17.32820751			136	2	271	6	1758	14	350.8	4.7	336	6	688	8	400.6724623	5.443855146	513.0465281	3.993848117	1811	11	272.1	3.5
2068	63	346.9	5.3	453	7	769	12	1439	57	2146	55	489.3	5.9	1827	14.7	262	3	917.1	9	1847.583854	10.95386676			273	44	275	11	1758	10	351.4	4.2	335	3	682	8	400.839475	7.308213651	441.6324586	8.702463774	1812	11	272.5140385	3.451445405
2526	54	347.5	4	454	9	286	4	1916	44	2391	49	491.8	5.7	1764.4	22	267	3	899.3	9	2550.629509	58.12004321			413	5	276	5	1757	11	358.6	4.3	334	4	682	7	401.5417755	6.55560867	246.2677568	2.248447292	1812.6	20.6	272.9	3.5
2448	56	349.7	3.8	456	8	852	11	2340	130	2415	60	493.7	6	2723	12.9	271	2	852.5	9.1	1863.411398	11.46904963			276	14	277	9	1751.49952	71.84817363	369.7	4.6	328	3	678	8	402.9435627	5.184866497	262.747355	3.68845578	1813.1	10.3	273.4	3.3
2489	42	353.2	4.1	459	9	227	5	2091	48	2450	55	496.4	5.7	2700.2	19.7	272	6	896.7	9.2	2107.549408	26.25450423			690	10	280	18	1751	40	370.8	4.3	328	5	676	8	403.1158658	7.202045348	938.2178871	12.31122095	1815	11	273.6	3.1
2396	30	356.4	3.8	460	8	450	6	1407	108	2465	47	498.9	5.5	1801.3	24.4	273	2	865.3	9.2	2292.270449	12.18432693			972	14	284	7	1750.375847	14.00321648	389.2	4.4	328	7	676	6	404.2250122	7.660810461	272.7289611	2.557436394	1815	11	273.7	4.1
2624	63	356.8	4	460	8	444	6			2510	59	499.7	5.5	1889.6	14.5	273	9	1486.7	9.4	2516.66057	39.49743811			561	13	286	9	1747.306911	38.28820851	412.7	4.8	327	4	675	8	404.3	15.1	355.2436634	5.016185584	1818	20	274.1	3.8
2689	114	357.2	4	460	26	420	7					505.1	6.9	1066.1	19.3	274	5	1620.9	9.5	1977.652247	14.89489486			141	3	287	12	1745	12	418.9	5.1	326	5	673	8	404.33318	7.255014088	444.2643977	11.6066647	1819.3	11.5	274.2	4.1
2754	47	359.9	2.8	462	10	925	14					506.6	5.8	2383.1	9.3	277	3	1509.3	9.6	2070.290335	90.84120103			141	2	287	15	1744.146782	2.374816577	420	5.2	326	5	669	8	404.6	7.1	368.7916573	3.621475744	1820.9	12.5	275.2	3.8
2468	51	360.1	3.7	462	18	230	4					510.1	6	2482.6	8.9	280	4	1411	9.6	1918.432584	11.25802743			427	10	290	8	1743.037647	12.26673383	422	6	326	6	666	8	405.2	5.1	271.9173254	3.911014169	1821.7	11.8	275.4	3.7
2705	66	360.5	2.8	464	9	272	4					511.3	6	1800.3	25	284	3	972.2	9.6	1861.594595	22.44162857			432	7	291	10	1740	10	424.6	5.7	325	3	665	6	405.2	21.5	247.7175472	3.370963795	1821.9	12.7	275.6	3.5
2694	40	361.6	3.9	465	9	797	11					514.4	6.2	1810	27.1	290	6	980.2	9.7	1896.436453	18.53992758			14.4	0.4	299	12	1738.336358	10.06471496	429.2	4.7	325	3	661	7	406	6.4	726.3686556	11.45476172	1822	12	275.6	3.7
16.6	0.8	361.7	4.5	469	8	876	12					535.5	8.6	1161.7	21.3	292	3	1849.7	9.9	2530.71269	8.178882949			433	7	304	9	1738	11	430.5	5.7	324	6	659	10	406.6	5.5	218.388339	7.616940376	1822.7	9.7	275.8	2.65
118	3	363.5	3.9	471	10	260	5					535.7	6.6	1935.7	15.1	293	3	1901.3	10	1684.926552	14.29743077			145	3	308	8	1736	13	434.9	5.4	323	4	652	6	406.8	13.1	422.901988	3.09762608	1822.9	9.3	276	3.9
121	3	365.7	4.5	479	11	257	3					566	6.2	41.6	1.4	299	3	1864.5	10	2459.460115	17.92174172			435	6	316	9	1735.179086	21.80600101	439.2	4.9	322	6	645	7	407.4197824	5.962395435	417.6956829	2.675571601	1823	11	276.1	4.3
152	5	366.4	4.1	482	9	458	7					568.7	6.6	63.6	0.3	308	5	1890.2	10.1	2445.787709	12.05048406			293	9	320	8	1735	11	442.8	6.1	321	7	642	8	407.6147774	6.534078317	398.524293	4.918157396	1823.2	12.2	276.4	1.8
164	5	368.7	4.4	483	8	457	7					575.1	6.7	65	1	312	3	1982.6	10.1	2459.994232	11.45782676			446	8	325	8	1734	11	447.4	5.5	319	4	639	7	407.6350575	6.60565571	438.9065733	4.565675559	1824	12	276.7	3.2
196	3	369.3	4.3	486	8	332	5					577.4	6.7	105.2	0.6	354	4	1876.4	10.1	2082.641584	30.22881863			447	6	334	7	1731.263562	16.01852907	447.9	5.3	317	11	629	6	408.0425054	5.22060831	926.3262528	10.58170406	1824	14	277	3.6
198	5	370.8	4.1	489	9	807	11					581	6.8	105.3	2.8	360	4	993.7	10.2	2332.255814	33.45742356			447	7	334	9	1730	11	448.7	6.2	316	3	627	7	408.2	15.2	451.9197409	2.301755385	1826	12	277.8	3.2
211	6	372	3.2	491	8	403	6					594.7	7.4	110.7	1.2	362	3	1712.4	10.2	1808.238283	50.16309426			605	9	340	17	1729.737392	4.746869225	458.5	5.5	316	4	627	6	408.3570567	6.333347564	929.1676904	7.345984012	1826.1	14.3	277.9	4.6
221	7	372.3	4.4	492	7	753	10					595.2	8	195.4	7.6	362	3	1922.7	10.4	2436.94476	19.81040019			455	9	353	16	1729	8	459.9	5.6	315	4	626	5	409.1548741	7.048179628	942.4105396	30.37169806	1829	12.1	278.5	3.4
233	7	373	4.6	493	17	432	6					595.7	7	203.8	5.1	376	4	1983.8	10.4	2379.422786	14.24645629			788	12	383	16	1729	12	460	5.3	314	3	606	7	409.2	12.4	726.2406347	8.216292894	1829	8	278.7	3.3
237	6	373.8	4.3	495	11	785	11					602.5	7.4	204.3	7.2	387	3	1835	10.5	1792.88126	58.76229584			158	2	393	18	1725.130927	6.513115263	474.1	6	313	3	595	6	409.4943528	5.181139654	919.0389331	10.51079019	1829.9	11.7	279.4931845	3.81981301
239	5	374.5	4.2	500	14	429	6					605.9	6.6	204.5	3.3	388	3	2372.2	10.6	2486.369288	14.86485891			796	24	398	13	1724.349499	36.85159376	479.1	5.6	313	6	593	7	409.7	23.6	913.5673728	6.32520004	1831	12	279.6	3.8
239	7	374.7	4.5	506	11	649	9					620.5	6.8	209.9	3.1	396	3	1876.4	10.6	1935.002045	14.70347073			487	12	403	15	1717	12	497.4	5.8	311	3	592	6	409.7171604	6.540793097	435.816704	2.320907953	1832.1	6.4	279.7	2.8
242	5	375.9	4.1	511	11	454	7					627.8	6.8	213.1	5.4	408	4	1787.1	10.6	1395.0953	16.78457035			997	16	405	14	1708	31	505.3	5.9	311	6	584	6	409.9252271	7.464559475	901.1119595	7.94874102	1832.1	11.7	279.7	2.2
244	7	376.1	4.4	520	40	439	8					628.8	7	214.5	4.1	410	4	1974.4	10.6	2540.056216	11.03018943			334	5	412	11	1703	11	507.2	5.8	311	7	579	8	410.1	19.2	986.9346908	18.89462856	1832.8	14.6	280.419052	8.610396926
248	6	377.1	2.9	523	13	433	6					644.7	7.2	217.2	15.5	410	3	1952.2	10.7	2528.16883	13.42626257			510	11	416	11	1698.166408	15.48223519	552	6.3	310	8	575	5	410.1918291	7.810294798	243.2305002	2.930238966	1833	11	280.7	3.5
251	5	378.2	3.2	535	24	247	4					649.7	8.6	223.6	8.3	415	5	2454.9	10.7	2491.794915	15.3064386			514	6	420	13	1693	39	751.1	8.8	310	6	571	5	411.1300043	7.817666859	481.1317432	4.065823725	1833.1	17	281	3.4
253	6	379.2	4.1	546	22	640	9					650.7	9.9	227.4	2.8	430	11	2515.2	10.8	1974.417622	13.70787642			515	7	422	12	1691	11	776.6	8.7	310	6	568	6	412.3	9.8	438.8881341	4.909216528	1835	10	281.3	3.3
254	7	380	4.3	552	9	303	5					657.2	7.8	234.3	5.1	466	37	2633.4	10.8	1955.085607	16.67928728			520	8	422	12	1688	11	840.9	9.6	309	4	557	7	412.5925953	6.410947578	910.668859	7.42623211	1835.4	11.4	281.4	3.2
258	5	380.5	4.4	569	21	437	8					657.6	8.4	240.2	7.1	487	5	2286.6	10.8	1906.018282	14.53523179			347	7	424	14	1684.468334	10.32229465	992.7	10.8	309	6	552	6	412.6	6.8	409.1067841	6.967685544	1836	11	281.5	3.7
260	9	381.9	4.7	608	18	434	8					668.4	8.1	241	4.1	582	6	1910.4	10.8	1851.198319	13.55538006			17.6	0.2	427	9	1677	24	1371.3	9.4	309	5	538	7	412.6	6.7	903.8336861	19.10836548	1836.5	13.6	281.6533352	8.301489364
263	7	382.1	4.5	610	8	534	8					670.8	7.6	243.4	2.2	605	6	2028.4	10.9	2488.35494	10.63234335			882	18	429	10	1671.847166	21.9344992	1398.8	9.3	307	5	533	6	412.8	13.8	440.7335878	2.365823211	1836.6	6.1	281.7	1.95
264	5	384.4	4.6	663	18	721	10					671.6	7.5	245.1	5.3	652	6	1074.5	11	1811.329716	30.39006736			17.8	0.3	431	12	1671.681967	81.83836231	1487.5	9.8	307	6	528	6	413.1	7.2	272.5563645	2.6995818	1841	11	282.2	2.7
265	8	385	4.2	671	18	294	5					679.6	19.8	245.3	10.4	692	7	1084.9	11.1	2462.412449	14.42446733			541	8	433	11	1671	11	1761.9	12.3	305	4	526	8	413.5	12.1	446.5786518	6.395054372	1841.6	11.9	282.5	3.7
267	11	385	4.3	674	16	455	8					683.3	7.7	245.7	9.2	727	6	2448.2	11.1	2450.248953	13.78184084			911	13	434	11	1669.983925	10.89385861	1770.7	12.1	305	3	524	5	413.6812507	6.677020025	468.8253297	5.617663251	1841.8	7.8	282.7022901	9.226701482
267	8	385.1	4.3	698	33	420	6					683.5	7.5	246.7	8.7	826	8	2532.8	11.1	1947.212471	14.9341099			183	3	434	8	1665.361879	45.80340626	1809.1	9.2	305	5	521	7	414.1571962	5.920278101	276.3477919	4.233230921	1841.8	7.2	283.3	3
270	8	385.2	4.3	702	12	274	5					699.2	7.7	248.4	6.9	849	7	2233.6	11.1	2424.078514	18.06307295			370	7	436	8	1660	13	1839.7	10.3	305	4	519	8	414.6214765	10.64238304	444.1355404	8.586180695	1843	11	283.4	3.8
273	6	385.3	4.6	708	11	271	4					701.4	7.8	248.4	5.7	857	7	954.4	11.2	2525.78722	9.667113922			562	11	436	10	1656.021674	17.92276175	1868.9	11.3	304	4	519	8	415.1849036	6.24415893	454.9793789	3.254590726	1843	12	283.4	3.4
279	6	386.1	4.3	719	19	445	7					703.3	8.2	249.9	16.9	865	8	1548.9	11.2	2509.29355	15.90013877			381	5	437	13	1654	50	1890.7	11.2	304	3	514	7	415.8	11.2	438.8217681	3.931998404	1843.6	13.3	283.5	3.8
281	11	386.3	4.3	731	14	248	4					704.1	8	249.9	6.7	868	7	1939.8	11.2	1951.056672	17.5796548			382	5	441	17	1636	13	1903.8	10.4	304	4	513	9	415.8243037	4.331345376	427.322443	2.324510671	1844	23	283.6	3.4
282	5	387.4	4.8	738	13	943	13					704.8	7.9	255.4	6.8	912	9	2033.3	11.6	1943.408786	15.02319492			383	6	442	9	1631	12	2420	10.6	304	6	512	5	416.5	10.7	910.9456205	21.4347463	1844.2	17	283.8	3.6
283	6	387.7	4.8	751	17	434	7					706.7	8.1	255.5	2	915	9	1073.3	11.6	1802.152659	59.56093934			192	3	443	19	1630	47			303	4	512	5	416.6	10.3	287.9941168	1.36043898	1845.2	7.3	284.6	3.4
289	8	388.1	4.2	759	34	479	8					708.3	7.7	256.7	4.3	920	9	2548.7	11.7	1977.144091	14.41596448			385	17	444	10	1610	12			303	5	512	7	416.7937185	6.621122622	430.9412181	11.54596459	1846	11	284.9847198	8.485689557
289	6	388.1	4.8	763	36	402	5					708.3	7.9	261.1	17.3	922	7	2030.4	11.9	1479.603162	627.8982637			578	8	444	9	1603	13			302	4	512	9	417.1	5	759.85853	2.866850322	1848	12	285	3.6
293	8	388.1	4.9	772	23	520	10					712.6	7.6	263.2	6.2	929	9	2149.1	12.5	1871.295628	19.33484526			980	16	446	16	1600	51			302	5	511	13	417.1	13.1	441.5226415	5.323984334	1848.2	13.3	285.7	3
296	10	390.1	4.2	772	15	652	8					715.6	7.9	264.3	5	971	8	2221.3	12.6	2035.348374	47.54497364			393	6	450	10	1599.31414	9.721077604			301	3	510	8	417.1	11.5	453.4469938	5.780014508	1849	7.6	285.8	3.8
306	9	390.3	4.8	773	15	231	3					721.2	8.6	266.7	5.4	974	9	2508.6	12.9	2146.999871	31.81696383			394	9	450	8	1599	71			301	4	508	8	417.2	12.6	263.2261979	3.844216825	1849.5	12.8	286.5	5.9
307	6	391.8	4.4	784	18	450	7					722.5	8.1	266.8	3.5	980	9	1346	13	1889.884142	13.74828157			396	5	451	11	1592	43			297	4	506	6	417.448819	5.387096746	437.80514	3.806949268	1850.9	11.3	286.5	3.8
308	7	392.6	4.4	787	11	489	9					722.9	8	267.3	6.5	1052	34	1611.2	13	1939.187801	23.40980657			398	5	455	10	1589	38			297	4	505	6	417.6	15.7	830.9354543	7.625897217	1852	11	288	3.9
316	20	392.7	4.6	792	10	442	6					723.2	7.7	270.4	10.1	1350	36	1449.9	13.7	1889.318741	11.51229241			996	32	458	13	1565	65			296	5	501	7	417.7	23.8	801.8213106	12.23305164	1852.1	12.9	288.7	2.15
326	12	394.1	5.3	800	14	881	12					729.2	8.2	272	7.4	1402	49	2501.6	14.2	1939.209255	18.8227242			402	5	461	12	1563	11			295	4	500	7	418.2234641	8.849840992	281.6405984	4.807118268	1855	11	288.9	2.35
349	8	394.2	4.3	821	12	240	5					733.4	8.2	272.5	2.2	1432	44	2188.5	14.8	1874.508124	31.07936031			404	6	462	11	1548.06983	20.47139124			294	5	497	6	418.6	23	904.7208292	18.71813237	1855	9	289.1157127	9.039275476
351	11	394.3	4.5	827	17	280	4					734	8.4	274.3	8.3	1512	39	1690.5	14.9	1936.697414	12.6989018			203	3	465	17	1536	14			293	3	496	7	418.9589373	9.138428968	487.7936651	22.67210444	1856.4	12.4	289.2	3.7
358	23	394.3	4.4	849	15	279	4					734.1	10.3	276.8	6.1	1585	48	1692.4	15.1	2539.599539	12.53215714			408	6	465	10	1527	55			292	6	495	15	419	6.1	258.1252057	9.908156878	1857	12	289.4	3.9
370	10	394.4	3.1	853	23	232	3					742.5	9.1	277.9	2.8	1691	105	1482.4	15.3	2581.215963	9.260738072			409	6	466	13	1484.499974	17.48366007			291	2	495	7	419.1237678	7.348785488	2167.850026	3.068393457	1857	11	292.1	3.5
375	8	394.6	4.3	868	28	227	3					746.1	8.3	279.9	5.3	1796	72	1732.1	15.4	1881.047035	17.67355289			425	8	467	20	1477.11793	9.55517674			291	3	494	7	419.3	15.4	983.2914872	26.5167092	1857	12	292.3	4.3
385	7	394.6	4.4	868	20	188	3					760.3	9.5	280.9	7.6	1867	37	1715.2	15.4	2614.404145	18.98141317			425	6	470	11	1477	14			291	3	492	6	419.6	4.5	2361.396829	4.779841073	1857	12	292.5	3.4
386	15	395.1	4.3	872	13	403	6					760.5	8.4	283.5	7.5	1864	162	1705.4	15.7	2462.477017	15.13813212			425	6	470	11	1464	65			291	3	491	9	419.7123103	6.830038035	1587.541794	7.886806348	1857.8	5.8	292.6	4.2
388	10	395.2	2.9	878	17	236	4					763	8.4	285.2	2.2	1788	72	1860.3	15.7	2489.404107	21.22430726			213	4	474	9	1456	14			291	3	490	7	420.2797717	14.06583044	1862.447932	10.39344186	1857.9	12.5	292.9	4.3
389	9	395.5	4.3	914	13	888	11					763.3	8.4	286	3.4	1968	63	1732.1	16.1	2537.194037	9.97905416			215	3	478	12	1456	77			290	3	489	9	420.5158195	7.62712575	1263.849759	12.37138215	1858.6	11.8	293.3	4.4
396	8	396.2	5	915	32	442	9					765.7	8.7	287.2	2.8	1951	72	1977.9	16.2	2227.999855	10.01013116			432	7	478	18	1450	9			290	4	489	12	421.5	15.7	2537.005033	10.64291037	1859	11	293.6	4.1
403	24	396.5	3.2	915	108	832	12					766.9	8.8	287.5	2.4	1923	28	2004.5	16.2	1923.730841	15.02297767			667	11	479	13	1449	16			289	4	489	10	421.6106973	8.225874357	1725.657417	5.160261144	1859	12	294.2	4.1
404	10	396.9	4.3	925	14	405	7					769.3	8.7	289.1	16.4	1952	114	2118.5	16.5	1981.313099	20.27681112			905	11	481	14	1448.802902	9.923951519			288	4	489	8	422.7339844	5.994652863	1436.929526	8.812513303	1859.2	6.3	294.4	4.1
406	9	397.2	4.6	945	15	236	4					773.5	9.2	289.8	3.3	1915	35	1975.9	16.5	1963.457503	10.53195679			453	8	481	16	1445.909823	3.561175735			287	6	488	14	422.8713443	5.167290878	2283.104968	12.92703125	1860	11	295	3.2
415	8	397.6	4.7	946	23	250	5					776.8	8.6	291.6	4.3	1990	65	2047.1	16.9	1968.100599	16.71319233			906	12	489	14	1442	12			287	11	484	8	422.9127277	3.503575437	2546.251742	3.872338555	1860	12	295.3	4.6
418	9	398.1	4.5	956	25	216	4					777.4	9	292.6	6	1981	40	1860	17.4	1916.690431	11.11036537			227	4	489	25	1430	11			286	3	483	7	423	15.1	1876.828877	9.173256023	1860.6	11.1	295.3	3.8
420	7	398.3	4.9	958	39	231	3					797.3	9.5	292.8	7.3	2007	60	1901.5	17.9	1927.350045	73.07322559			908	21	510	13	1425.681193	13.54240723			286	5	482	6	423.2310198	8.058881221	2529.933341	8.402564132	1861	7.5	295.4	1.65
422	10	398.5	4.4	962	12	425	6					800.1	8.8	294.8	10.8	1885	25	2520.5	18.3	2231.553448	14.95312757			228	3	511	25	1423.105254	18.06769213			285	3	482	7	423.648884	6.856455071	1474.797875	5.048474429	1861.8	13.9	295.6	3.8
423	7	399.2	4.8	966	16	472	6					803.8	8.8	295.3	5.3	2095	35	1811.3	18.8	1842.595802	13.95031628			229	4	511	24	1423	15			285	4	481	6	423.7	15.6	1595.192424	8.353423257	1862	11	295.9	4.6
424	10	399.3	4.6	983	13	440	7					806.9	9.6	295.4	5	1934	46	2453.4	19.2	1939.720336	16.33254553			921	10	515	10	1422	14			285	6	480	7	423.7676507	8.01196242	1493.513409	18.1809499	1862.1	11.9	295.9	2
425	10	399.6	4.4	994	21	745	12					807.1	8.8	299.2	6.9	1957	89	2490.6	19.4	2004.225387	11.12122784			232	4	524	23	1401.302474	11.4356159			285	8	477	6	424.3	11.2	1613.236109	28.55275553	1863.2	11.5	296.1	3.65
428	12	399.8	4.2	995	12	416	6					808.8	8.7	300.5	8.8	1970	53	1878.5	22.6	1965.300803	12.07367461			240	4	532	10	1401	13			283	3	477	5	424.6	7.4	2011.583008	5.561570827	1863.5	7.2	296.4	3.4
428	11	399.8	3.3	1009	74	302	5					808.8	9	300.7	7.6	1937	176	1677.4	23.3	1697.473149	83.26970113			240	6	543	11	1400	11			283	3	476	5	424.6	12.5	2498.524395	4.651417385	1864	10.4	296.9	3.9
428	10	400.9	4.4	1034	95	250	4					810.6	9.3	301.6	7.2	1959	27	11.2	0.3	1828.121034	32.50658099			969	13	548	23	1386	56			283	4	476	8	425.0994783	5.751954951	1864.31582	1.197427138	1864.3	12.7	297.8	4.1
430	11	400.9	4.3	1055	75	263	4					812.9	9.3	302.6	10.2	2024	32	220.6	2.3	2546.566746	13.2741987			243	3	575	26	1385	44			283	5	475	6	425.6	12.2	1452.603128	18.01608028	1866.2	5.5	297.8	2
432	9	401.1	3.1	1062	134	442	6					818	8.8	304.3	6.9	1948	130	223.5	2.4	2377.747025	15.54509981			734	12	589	21	1382	54			282	4	475	6	425.8	9	1167.979929	19.06267322	1866.3	7.9	297.9	3.9
433	8	401.3	4.7	1065	66	258	4					825.2	9.4	308	14.2	2180	130	232.5	2.4	2366.735034	18.07276652			248	5	666	18	1376	8			282	5	474	9	425.9	14.5	1837.78314	11.35701102	1866.7	12.5	298.7	3.7
433	7	401.4	4.4	1069	83	283	6					838.3	9.5	316.6	5.9	2046	66	237.2	2.5	2383.815471	14.89954551			251	4	671	13	1370	70			281	5	474	7	426.1	16.5	1195.840256	8.152043467	1866.7	11.9	299.7	3.6
434	7	401.7	4.5	1090	46	800	11					883.3	9.6	328.2	2.2	1985	57	241	2.9	1935.257759	14.57346076			266	4	682	13	1359	41			280	3	473	9	426.1226055	9.225989246	2473.574259	2.613293329	1867	13.7	300.2008111	8.850658462
434	10	402.6	4.5	1118	64	261	5					890.9	9.9	332.5	7.4	1997	255	246.4	2.8	2548.142068	13.11886734			808	9	690	28	1356	66			280	3	471	7	426.4666216	13.74505865	2514.283549	4.163897512	1867	11	300.3	3.9
435	10	402.8	4.5	1118	141	801	12					891.3	9.8	334.3	5.1	2159	71	252	2.9	2373.197536	9.406883848			270	4	710	29	1341	44			280	6	470	9	426.5	9.7	1753.013197	4.86757827	1872	11	300.4	4
436	10	402.9	3.2	1135	165	259	5					895.4	9.5	337.5	5.5	2352	170	257	2.8	2511.948843	29.73178044			812	29	722	16	1333	15			280	4	469	4	426.8	15.6	1600.710727	9.548772546	1872.3	13	300.4	3.5
437	11	403	4.7	1157	160	458	6					895.9	9.8	341.3	4.1	2370	112	259.7	2.7	2331.11948	9.974956873			273	5	736	14	1305.947745	20.83928877			279	3	469	5	426.9578574	7.271419645	1855.039503	7.535863935	1873	11	301.4	3.8
438	9	403.7	4.5	1171	86	425	6					896.5	9.8	344.2	7.5	2379	45	260.3	3	1684.179575	22.5945066			276	5	737	22	1297.720654	15.40351003			279	3	469	5	427	12.8	1879.779463	13.11362123	1874.4	7.2	301.9	3.7
439	9	403.7	3.1	1175	383	152	4					898.6	10	346	7.9	2516	140	260.5	3	2387.141164	11.10685302			277	5	756	28	1248.732221	33.51256262			279	3	468	8	427.2	10	1891.282573	6.17832632	1875	12	304.6	4.8
440	9	403.8	4.5	1211	43	452	6					915.1	9.9	346.3	8.7	2446	27	266.5	3	2116.685311	22.80522437			554	9	763	17	1220	14			279	4	464	5	427.2872573	7.62493851	1491.444513	9.937397496	1876.1	8.7	305.1	3.8
440	12	404.1	4.8	1244	90	196	5					917	9.7	352.4	3.2	2457	60	266.8	3	2014.760932	15.29124258			282	4	775	14	1210	48			279	5	464	5	427.3	10.2	2512.563293	6.723333932	1876.4	6.3	305.7	3.5
441	10	404.3	3	1264	42	297	5					920.2	9.7	358.1	3.6	2479	60	272.8	2.9	1985.423279	14.95239287			289	8	788	38	1205	15			278	2	464	7	427.4838127	6.542817962	1198.769913	12.31283416	1876.9	10.4	306.2	3.8
441	13	404.4	4.7	1293	77	193	3					924.4	9.8	368.1	2	2450	44	273.5	3	1947.337547	16.41253336			867	33	793	26	1178	12			278	4	464	7	427.8	13.8	2287.449103	3.950180883	1877.7	6	306.8	1.8
441	8	404.6	4.9	1355	211	446	7					925.9	10	381.9	7.2	2486	26	273.7	3.1	1671.945653	54.64634579			591	21	795	28	1166	9			278	6	463	7	427.8376115	6.93925887	1666.345147	5.286133501	1878	9	307.2	7.6
442	7	404.9	5.1	1400	196	431	7					926.3	10.2	382.5	5.9	2572	145	277.9	3.1	1831.072852	14.12903934			598	9	810	26	1165.050778	13.04095921			277	5	462	5	427.8887889	8.254448459	1198.430866	8.997274637	1880.2	7.9	307.8	2.5
443	8	404.9	4.4	1443	118	773	10					928.1	13.5	384.9	7.8	2558	84	279.1	3.2	2496.249689	12.14451162			601	9	815	16	1161.432057	7.070459407			276	3	461	6	427.9	17	1963.647301	4.654676758	1880.7	6.5	307.9	4.2
443	7	404.9	3.1	1567	256	239	4					932.9	10	386	11	2513	25	286.8	3.5	1593.787858	56.44228958			608	14	816	38	1153	13			276	5	460	5	427.9	9	1222.532129	36.29534897	1880.8	6.5	309.2395226	8.417527745
447	9	405.2	4.5	1606	151	289	5					934.3	10.4	387.6	6.7	2519	39	289.2	3.3	1985.195139	13.40401384			312	5	832	23	1147	12			276	4	460	5	427.9186813	7.321929253	1888.477027	9.600297603	1881.5	11.1	309.7	3.9
448	8	405.5	4.6	1610	62	462	6					935	10.4	389.8	15.4	2559	56	296.2	3.9	2514.027419	11.89568958			658	20	874	22	1135	13			275	3	460	7	427.9700044	9.134116836	2566.363513	76.67982611	1881.6	8.8	310.5	4.1
448	11	405.7	4.4	1634	149	573	10					936.8	10	397.8	10.1	2508	72	296.3	3.7	1787.352024	18.92721723			345	4	890	17	1132.335553	16.43370936			275	5	458	8	428.143608	6.615224203	1748.355801	36.0501565	1881.6	13	310.7	3.7
448	13	406	5.6	1637	133	573	8					947.1	10.9	401	6.5	2743	37	300.7	3.4	1969.794904	12.72400447			346	6	891	25	1122	12			274	2	458	8	428.5519869	7.363873991	1980.518908	3.080058339	1881.8	7.4	311.8	2.95
450	11	406.1	5	1672	103	227	4					957.3	10.4	402.3	9.3	2522	63	304.6	3.1	1991.792612	15.03445403			353	6	897	31	1108	10			274	3	457	6	428.7368106	7.970124391	1695.268645	31.10631687	1883	7	313.1	2.05
452	9	406.2	3.2	1680	151	238	3					961.2	10.6	405.5	10.8	2612	32	306.2	3.4	2607.336189	12.49261315			353	5	899	38	1104.519588	8.492798297			274	3	457	13	428.8954889	7.675613765	1183.94064	8.211426142	1884.9	7.1	313.2	3.8
452	9	406.4	4.7	1694	108	251	5					964.2	11.4	409.5	8.5	2492	46	311.2	3.4	1868.279379	11.47112309			711	23	916	27	1100	11			274	4	456	6	428.9	11.9	1613.856289	23.00841346	1885	10	313.4	3.9
455	10	406.4	5.1	1695	126	257	4					965.9	10.5	412.2	8.8	24.5	0.4	314.1	3.5	2524.603027	14.33105972			356	4	925	33	1091	14			274	4	456	8	429.1	24.1	1787.88372	4.430279275	1885	13	313.5	4.2
455	10	406.6	4.4	1732	136	327	7					966.9	21.2	413.6	10.2	185	2	319.5	3.6	1921.314409	11.30885648			372	5	942	30	1086	11			273	5	455	5	429.3	10.7	2879.629726	9.190512507	1885	14	315.6	2.25
458	7	407.1	4.7	1736	103	340	6					980.1	10.9	414.6	10.3	197	2	332.4	3.4	1963.620883	18.49484482			379	4	950	22	1071	13			272	3	455	5	429.6	40.9	825.8707421	9.908791852	1887	11	315.9	4.4
459	29	407.2	4.4	1748	73	638	9					991.4	10.8	415.6	5.9	203	4	339.2	3.5	2535.703565	11.57737472			382	7	968	18	1059.821578	44.32479434			272	4	455	7	429.6	15	446.2092108	3.785347444	1887	11	316.3	4.1
463	9	407.2	4.6	1775	80	459	7					1107.4	8.9	416.1	10.6	212	2	367.7	3.8	2155.46082	20.94805869			385	7	976	19	1028.480605	36.70301837			272	6	453	6	429.7	10.8	954.0037678	27.47768397	1887	50	316.6	2.55
463	8	407.8	4.4	1781	69	448	7					1111.1	13.2	418	28.4	222	2	397.4	4.1	2156.63244	18.94193422			773	12	1102	244	1028	12			272	4	451	6	429.8	12.9	465.9957323	11.58101578	1887.1	11.5	317	4.1
464	9	408.4	4.5	1788	90	428	7					1118.9	9.9	418.3	8.7	226	2	398.3	4.3	1882.674205	15.73697335			387	5	1119	246	1019	62			271	2	449	7	429.8	11.6	451.5335293	4.841462234	1887.2	11.1	319.4	5.3
466	9	408.9	5.8	1793	90	305	4					1119.4	11.9	418.6	7.6	234	2	401	4.3	2353.32967	18.81008739			388	6	1307	96	1003	9			271	3	448	5	430.1673679	6.497312984	932.5202231	20.88457749	1889.6	7.3	319.4	2.6
468	7	409.2	4.4	1796	36	269	6					1130	29.6	419.9	16.7	236	3	406	4.4	1937.773887	15.88630409			389	6	1261	342	1002.084116	10.78898082			271	3	448	4	430.3	25.4	822.5292096	4.845502068	1892	12	319.6766758	9.580306022
472	12	410	4.7	1814	88	190	3					1143.6	11.5	421	17.3	236	7	409.3	5.1	2433.335522	11.41220576			399	6	1396	117	1002	12			270	5	448	9	430.6	6.9	453.3194903	9.484877866	1893	11	319.7	2.55
472	11	410.2	4.4	1857	135	427	8					1149.9	12.9	423	32.4	241	2	414.8	4.4	2552.052969	12.27075666			402	8	1232	147	999	11			269	2	447	5	431.1	15.1	441.4006073	8.833376231	1893.8	7	320.7	4.7
481	10	410.4	4.5	1879	128	935	12					1156.3	10.7	424.6	4.5	249	2	414.8	4.4	1952.84271	17.41493188			406	6	1256	152	999	12			269	6	447	6	431.1972701	9.565240684	957.9282453	6.92658381	1894.7	14.2	322.4	3.7
481	25	410.4	4.5	1893	105	411	6					1164.9	11.8	425.2	3.8	251	8	417.9	4.8	2368.015462	29.3887575			408	5	1544	92	996	11			268	4	445	4	431.5	11.4	239.4851446	2.838735554	1895.3	6.3	322.9	4.3
486	11	410.7	4.4	1904	104	1566	62					1179.4	11.6	428.6	23.7	273	3	422.5	4.4	2483.704761	10.1697149			412	8	1463	206	987	12			268	4	445	7	431.5547825	6.495158293	930.6819727	7.225813482	1896	11	323	4
490	9	410.8	5.3	1910	81	2385	26					1183.6	10.5	429.8	6.2	290	3	422.6	4.2	2569.027909	14.9979998			832	15	1448	138	986	11			267	3	444	4	431.7	9.8	451.4830804	11.85247753	1898	11	323.4	4.4
490	8	410.9	4.4	1914	87	1232	37					1254.1	9.6	430.1	5.7	291	3	429.3	4.8	2391.759762	26.31968414			418	6	1691	90	984	12			267	3	443	6	431.9	13.5	319.9030877	1.214454064	1900.6	12.7	323.7	3.7
491	9	410.9	4.9	1915	101	1644	27					1308	11.6	433.8	10.5	292	5	429.6	4.4	1950.689365	29.51067517			419	7	1760	102	981	11			267	4	443	4	432.1	44	455.6569442	5.52469651	1900.7	10.7	324.9	4.3
499	10	412.2	5	1935	148	973	33					1314.9	13.3	435	10.1	298	5	429.9	4.9	1967.343197	9.512414404			427	5	1649	80	981	11			267	4	443	4	432.1	8.3	927.5614565	15.60800429	1901.8	11.2	326.1	4.2
505	8	412.4	4.5	1943	108	2076	31					1321.7	9.8	435.5	7.9	303	3	431.8	4.5	2346.793776	12.90668115			432	8	1871	93	976	8			266	3	443	6	432.2	9.6	442.4578335	3.095674746	1902	12	327.3	2.85
508	12	413	5	1956	31	1571	32					1349.2	13.3	439.5	14.7	309	5	438.5	4.7	2361.467629	17.0704966			919	41	1559	140	975	11			265	3	443	7	432.3	14.8	238.7024447	3.733511244	1905.5	8.8	327.6	4.1
510	9	413.2	4.4	1961	178	1820	37					1371.1	20.7	440.5	17.1	316	3	439.2	4.6	2265.485828	19.168509			462	6	1675	153	974	11			263	5	442	7	432.3	14.6	297.6523291	8.258444687	1905.5	10.6	331.3	4.3
512	12	413.2	4.7	1973	172	2489	26					1406.5	14	440.7	15.9	322	6	440	4.9	2708.596723	15.36916338			936	11	1827	85	970	10			262	3	441	6	432.4	8.9	299.4573852	2.62784659	1906	13	331.9953126	10.37076862
517	14	413.4	3	1979	57	1734	27					1409.3	10.1	441.8	14.1	346	4	440.8	4.8	1933.426311	11.25528405			491	6	1921	95	967	10			262	3	441	6	432.5	12.4	280.2050298	2.985363911	1906.7	13	333.2	4.8
524	10	414.6	4.5	1988	298	2482	33					1426.4	10.3	442.6	9.1	354	9	444.1	4.6	2411.832048	10.8958448			498	8	1830	146	963	9			262	4	441	7	432.5	22.4	438.7036997	19.28168902	1908	12	334.2	4.2
531	21	414.7	4.3	2007	64	2645	34					1442	14.9	444	11.8	364	5	451.5	5.2	1665.728819	152.4113562			610	8	1847	60	961	10			259	4	440	7	432.9595366	9.203498632	429.8615701	3.8004482	1911.2	16.3	334.4	4.2
537	18	414.7	4.5	2075	58	1832	32					1462.4	14	444.4	17.1	376	4	453.4	4.9	2519.099298	8.653442607			676	34	1866	214	959	9			258	2	439	8	433.1832539	8.80020046	447.9718937	7.734170799	1912	12	335.1	2.7
567	9	415.1	4.6	2087	143	1976	29					1471.3	19	446.7	6.6	397	6	457.9	4.9	2416.581414	26.40876149			792	15	1868	62	958	12			258	3	438	5	433.1901272	6.856349521	434.8414362	3.206109335	1912.4	10.6	335.4	4.3
593	13	415.8	4.7	2093	51	1141	30					1471.9	10.9	447.7	11.3	407	4	459.2	5.2	2380.064275	19.63102226			857	12	1892	145	953	10			256	3	438	7	433.278121	5.048920095	264.3649065	4.134505965	1913	11	335.9	4.5
597	14	416.1	4.5	2118	97	1433	33					1496.2	11.1	448.9	8.2	407	4	472.4	4.9	1789.231661	69.88892931			860	13	1878	63	951	11			256	4	437	7	433.3	13	420.381662	5.04363973	1913.5	11.8	336.6	4.2
623	13	416.7	5.1	2192	80	1980	30					1504.1	12.9	449	14.9	409	4	476	4.9	1621.087417	75.98588955			944	11	1754	71	950	10			254	5	437	8	433.4	12.7	909.6063593	12.49933809	1915	12	337.1	4.3
634	14	417.1	4.9	2201	31	1831	28					1512.9	12.8	450.3	17.1	410	4	479.4	5.3	2483.782429	11.73249234			3.4	0.2	1806	92	949	11			254	4	435	6	433.4578388	6.035004534	319.3127982	2.792702506	1915.3	7.2	339.5	1.8
684	13	417.1	4.8	2206	37	1759	28					1552.7	14	452.2	12.9	418	5	489.9	5.1	2423.843138	21.89635604			6.8	0.3	1846	62	939	8			253	2	435	7	433.7	10.9	906.8548044	8.960787796	1916.7	7.1	339.7	2.4
702	15	417.4	4.5	2292	50	1145	45					1557.7	14	452.2	8.3	427	4	566.2	6.1	1679.969815	13.88126651			10.9	0.4	1823	54	936	9			253	3	435	6	433.8	10.2	438.5638843	5.35631666	1920	33	340.6	4.3
711	20	417.9	4.9	2340	160	1839	29					1564.9	13.5	452.4	2.8	434	4	584.2	6.1	2525.299837	10.06878088			11.7	0.3	1829	43	935	10			252	3	432	6	433.9348135	7.81460576	280.77669	9.351286832	1921.7	10.5	345.1	4
728	19	418.7	4.5	2364	70	1699	28					1576.3	12.2	453.6	3.9	434	8	696.9	7.3	1901.157655	23.91247716			11.7	0.2	1910	49	934.4663733	7.265815716			252	5	430	10	434.1	15.8	460.6588703	6.009367465	1921.7	12.7	349.7	5.1
729	22	419	4.5	2392	86	1360	29					1609.3	13.4	459.4	21	440	4	748	7.5	2526.456014	8.982399585			12	4	2088	97	933.719999	13.68360649			250	4	429	5	434.2893855	7.082698825	250.8770661	2.801568206	1923.9	13.7	352.2	4.1
740	13	419.5	5.1	2422	43	2536	25					1626.3	25.6	461.3	8	442	5	760.9	8.4	2532.4369	25.64316477			12.1	0.2	1849	49	933	9			249	5	427	5	434.5	9.2	723.4729123	9.005168384	1924.2	6.7	356	7.5
743	11	420.2	4.7	2432	48	1843	40					1637	13.5	468.2	6.2	442	7	771.9	7.8	2179.4372	20.22576508			13.4	0.3	2148	82	925.5860252	8.658022689			248	4	426	5	434.6	13.9	441.0262023	8.967717814	1924.6	13.1	358.5	4.3
758	14	420.3	3.2	2450	33	1099	32					1669.9	11.4	470.1	13.1	446	4	824	8.3	1892.643399	15.76677421			16	4	2003	178	922	10			248	7	426	6	435.2	15.1	270.9767669	4.45796982	1925.9	6	358.9	4.4
760	25	420.5	4.6	2469	34	2494	31					1671.5	15.1	470.3	5.5	478	7	828.1	8.3	2295.4007	20.535897			26	3	1904	69	922	11			247	2	425	6	435.3134387	4.392821516	265.0202952	2.578755241	1927	10	359.4	4.1
762	16	420.8	4.6	2476	64	1993	29					1672	13.3	470.6	41.2	507	6	839.6	8.8	2855.332308	9.466254662			29	1	1867	47	922	11			245	2	424	5	435.4	13.2	486.8701359	3.947031222	1928	13	363	5.5
767	18	420.9	4.3	2490	39	1733	38					1684.6	16.4	471	4.5	516	4	887.6	8.9	2507.581852	10.20573201			32	1	1882	119	920	8			245	3	423	5	435.6	6.8	264.8319082	3.118687533	1934.9	11.8	367.1	5.2
786	16	421.1	4.8	2501	34	2555	31					1690.5	13.3	472.4	6.2	534	4	936.1	9.2	2498.018485	9.292625412			41	14	2149	164	912	9			244	5	422	4	435.9	19.1	973.1659266	40.19909405	1937	12	368.9	4.2
788	28	421.7	5.4	2532	62	1853	30					1727.7	10.8	474.7	4.6	550	16	1022.1	10	2518.210219	27.03644117			50	2	1803	77	911	10			241	4	422	5	436.1	4.8	291.7215313	3.790191586	1937.5	10.9	369.6	6.3
791	21	421.9	4.5	2535	97	1753	33					1728.8	13.6	475.2	6	560	8	1116.8	16.3	1987.750727	18.36801719			54	2	2281	168	907	10			240	2	421	4	436.2054488	6.684394371	442.4749322	3.806513703	1939	11	371.1	3.1
799	26	421.9	3.7	2536	88	1804	49					1750	22.7	476.8	9.9	601	6	1228	10.7	2419.879678	13.18051153			63	1	2027	109	907	9			240	2	421	5	436.4	15.5	274.4986138	5.668507272	1940	11	371.2	5.1
809	16	422.2	4.7	2631	96	1588	36					1761.4	13.1	481.6	1.7	642	6	1421.5	13.3	2524.226342	15.82727284			69	2	2267	82	906	10			238	5	421	5	436.4	15.7	279.3685382	3.324528468	1940.5	12.3	372	4.3
818	17	423	4.8	152	2	2396	24					1763.7	11.9	483.9	13.3	645	7	1437.6	12.1	2448.368308	13.93585985			83	1	2164	114	900	9			237	2	421	7	436.4	16.4	258.0731057	4.489480166	1940.7	7.3	374.7	4.2
821	16	423.4	4.5	225	4	2024	26					1779.8	12.8	489.5	6	678	7	1580.9	12.4	2265.607712	17.82348419			85	2	1957	71	900	11			233	2	421	6	436.5	17	468.8908311	5.19519054	1941	11	375.8	5.8
843	15	424	4.9	226	4	1956	34					1782.1	15.8	492.4	11	795	6	1582.6	15.3	1946.751408	12.25465211			100	2	2147	113	899	10			233	2	420	4	436.7	13.8	268.76941	2.288691314	1944	11	377	5.4
859	19	424.2	4.7	233	5	2387	31					1815	11.7	494.8	28.6	799	10	1601.8	10.7	3741.004476	8.65615512			106	2	1992	129	879	10			233	3	420	4	437	6.4	790.341617	13.88550697	1944.3	14.2	377.7	5.6
863	14	424.2	3.5	270	7	2499	23					1828.6	13.6	498	5.2	800	6	1681	12.1	2567.310775	21.73145697			115	2	1989	97	878	10			232	3	420	5	437.2	10.3	439.1481968	6.432920865	1944.4	12.5	379.6	4.7
868	15	424.3	5.5	275	4	1116	35					1831	17	504.1	8.7	816	6	1695.5	13	2186.898826	19.81349308			117	4	2247	123	867.9743617	22.51831535			229	3	420	9	437.3	8.1	261.6549116	2.769185939	1945	7	380.5	4.3
884	14	424.5	4.5	281	4	1854	35					1836	13.8	509.1	7.6	846	14	1753.2	15.3	2377.742034	13.26372152			125	2	2022	106	863	9			227	4	420	7	437.6	31.7	793.850056	18.58033387	1945.6	14	382.1	5.3
887	17	424.7	4.5	307	7	1604	28					1845.3	15.3	509.3	18.4	879	15	1754.2	12.7	2378.022008	15.58670925			131	2	2054	173	853	9			225	2	419	4	437.7	13.3	450.2906591	5.08809739	1946.1	6	382.4	5
897	15	424.9	4.8	309	7	1486	34					1845.8	22.2	510.2	8.7	881	7	1759.3	14.7	2402.561143	20.4631838			137	3	2044	93	848	9			225	3	419	4	437.8	13	266.7358005	1.741129228	1949.8	11.2	386	5.1
905	18	425.4	4.6	324	6	2043	32					1849.3	12.3	513.5	9.6	899	7	1773.2	15	2306.280989	9.400061055			140	3	2383	141	847	11			223	3	419	7	437.9512243	6.574783721	930.7661491	11.42024183	1951	15	387.1700656	4.086534433
911	15	425.4	4.5	326	6	1706	60					1850.9	12.3	526.5	12.4	936	7	1783.1	12.2	1735.933169	169.944972			151	3	2458	41	846.9367299	3.178954962			218	4	418	5	438.1	23.6	296.4980195	3.664666407	1958	11	387.8	4.8
924	13	425.6	4.6	336	5	1318	40					1852.4	11.7	526.8	8.7	1162	55	1798.6	11.7	2280.061307	14.73628157			154	3	2309	68	844.4697601	3.429073947			217	2	418	5	438.498852	9.672101608	463.2449164	21.406686	1963.9	13.6	389.3	4.6
926	19	426.2	4.8	359	6	2968	28					1856	11.9	534.3	23.8	1199	25	1814.4	11.1	1931.659898	13.06898874			156	4	2473	82	844	7			213	2	417	5	438.5	14.7	408.4335465	13.71786242	1967	10	390	4.5
935	13	426.3	4.5	372	7	2416	22					1856.4	12.8	543.4	29.1	1232	46	1823.2	13.1	1957.318336	24.6845245			156	2	2464	66	840	9			211	3	417	4	438.8	22.5	748.3473954	25.47428717	1967	12	391.1	4.7
939	28	427.3	4.9	379	6	1864	30					1856.7	38.7	548.9	10.7	1231	26	1825.5	13.4	1342.878925	16.19517237			188	4	2517	99	837	7			208	3	417	9	439	20.6	258.3716157	7.382906191	1969	11	391.4	4.9
952	20	427.5	4.5	379	6	2160	32					1868.4	13.2	601.9	17.1	1239	140	1837.6	13.5	1958.33385	11.59353935			198	3	2445	94	834	10			202	2	417	6	439.1	8.3	754.8933986	8.514247053	1969.8	14.1	393.6	3.1
959	43	427.7	4.8	382	7	1869	24					1874.2	12.5	614.8	57	1270	24	1839.4	13.9	1981.810839	16.05768533			199	3	2562	86	832.9464779	28.2693073			200	2	416	5	439.3	8.4	412.7904549	4.80403441	1971.3	12	394.7539047	11.97232323
961	16	427.8	4.8	382	8	1970	35					1875.2	12	719	7.4	1555	78	1849.7	11.1	1960.420588	15.89177715			206	3	2546	87	825	10			199	2	415	4	439.4	24.8	457.7318491	3.844612637	1971.6	11.6	396.7	2.35
966	20	427.8	4.6	391	7	1587	34					1884.3	15	725.7	35.4	1630	52	1880	12.7	2337.666733	16.50162517			207	11	2536	40	823	8			186	2	415	5	439.4	19.4	270.8924096	9.617927854	1972	11	397	5.5
975	20	428.4	4.8	403	8	1520	32					1894.8	13.4	729.3	12.1	1711	193	1886.8	16.1	2071.243213	31.21664916			211	4	2724	124	823	9			172	2	415	8	439.471511	6.616917809	707.0179047	12.44376221	1975.3	6.2	397.2	2.3
995	14	428.4	4.8	412	7	2085	31					1903	12.5	748.2	11.7	1724	19	1888.6	12.7	1903.038511	20.08422868			212	4	2715	87	820	10			98	2	415	7	439.9	17.8	446.5163522	2.939189811	1976	8	398.3	6.4
995	16	428.5	4.7	425	9	1533	35					1912.4	14.6	751.7	27.9	1655	32	1899.6	14.4	2268.280737	15.33804515			213	4	2606	82	813	10			85	4	415	6	439.9	10.1	182.094913	2.220450034	1977	6.8	398.6	5.5
998	16	428.5	4.6	427	6	1285	34					1920.7	11.5	753.6	17.7	1663	93	1899.8	13.9	2368.977736	9.885458947			217	3	2761	148	803	14			71	2	414	4	440	18.3	349.8503733	12.07150802	1978.4	10.8	399.6	2.8
1084	59	428.7	4.9	437	7	2108	25					1930.7	12.7	755.6	30.8	1724	24	1901	12.9	2563.547553	11.21609365			221	5	2500	37	801	8			60	1	414	9	440	6.1	382.4203179	20.36574503	1979	12	401.1	4.4
1030	167	428.9	4.9	440	8	2523	23					1934.2	13.3	763.2	22.5	1675	72	1922.2	14.6	2438.898653	15.05815242			230	4	14.4	0.2	796.2503476	5.516013892			42.6	1	413	4	440	12.4	444.0845304	4.528280364	1982.3	13.1	401.4	5
1063	146	429.6	4.6	444	9	1826	48					1935.7	14.4	766	6.1	1664	25	1964.8	12.5	1949.022842	16.49887668			233	3	39.9	1	780	6					412	8	440.1091645	7.031051183	337.4618434	29.43675238	1983	11	404.1	5.5
1106	70	429.9	4.9	457	7	1613	32					1963.2	15.4	772.8	7.7	1840	72	1977.2	12.4	2313.992589	18.52186754			233	7	244	3.2	779.0537206	4.633043927					412	5	440.3	15.4	382.6935323	11.61254767	1984	11	404.4	3.25
1266	128	430.1	4.6	462	9	2366	23					1975.4	17.1	778.9	18.3	1635	42	2003.7	11.1	2521.441477	9.984955256			243	3	244.6	3.2	775.1381155	6.275969337					412	5	440.3684542	8.055097752	497.6191028	17.17704045	1985	7.1	405	4.7
1346	76	430.3	5	511	10	1913	34					1988.3	12.1	785.2	13	1756	97	2134.8	13	2459.872247	10.11695057			246	3	244.8	3.2	773	9					412	6	440.6	6.3	257.5047003	5.440820996	1989	6.4	405.2	5.7
1089	79	430.7	5.4	524	11	1571	34					2008.1	13.4	802.7	59.5	2004	44	2373	14.5	2393.001932	30.46431908			247	4	246.5	3.3	766.4511765	26.19486762					411	4	440.7	11.6	1828.111466	10.07406156	1989.5	19	405.5984499	4.139962508
1305	49	431.2	4.9	524	17							2037.8	12.9	809	12.6	1817	56	2421	14.3	1886.66479	12.09388351			253	6	247.4	3.2	765	8					411	5	440.8	16.9	1490.618774	15.78848183	1994.7	12.3	405.7800467	4.321485137
1279	108	431.2	4.9	535	11							2039.4	12.5	834.4	8.4	2137	31	2436.6	12.5	2105.672264	11.38149934			260	6	250	3.3	760	8					411	7	440.8	10	1492.610615	11.06817966	1997.3	6	406.4	4.25
1372	103	431.5	4.8	616	11							2039.5	14.5	847	22.3	2062	57	2437.4	14.1	2552.0691	13.82375369			262	4	253.6	3.7	759	9					411	6	440.8	9.6	1542.21225	10.22009814	2000	19	406.6	5
1283	85	432	4.6	651	14							2096.5	20.1	852.8	18.3	1836	10	2479.9	13.8	1889.36372	19.92243504			264	4	260.1	4.8	757	9					411	6	440.8	19.9	1643.703082	14.84150306	2000.8	13.2	407.8	6.6
1331	87	432.8	4.9	653	14							2125.4	12.8	855.4	14.6	1885	20	2492.8	12.9	1967.288392	11.15231074			273	11	266.5	3.6	752.2509831	7.353862606					410	6	441.0749509	11.02254432	1871.206194	11.58016271	2026	11	409.5	4.8
1419	42	433	6.1	788	10							2140.4	13.5	872.6	19.7	2218	171	2494.2	11.8	1891.59635	109.1736966			302	5	270.8	3.6	743	7					410	4	441.1005168	6.811820764	1896.126922	16.25124362	2040.9	15.2	409.7	6.3
1549	107	433.3	4.8	814	14							2329.5	12.6	880.6	65.4	1909	61	2523.2	15.4	2324.862983	52.50584686			315	4	286.5	3.8	714	9					409	4	441.2	10.7	1552.638524	11.15533736	2042.8	8	409.7	4.1
1387	90	433.4	4.7	852	13							2344.2	19.3	896.9	23.3	2016	86	2563.7	16	1970.189725	11.84178347			318	7	330.5	4.6	701	7					409	5	441.3120693	6.538813617	1596.077713	14.730443	2043.7	7.5	410.5	7.8
1595	79	433.5	5	867	16							2352.4	14.5	904.9	8.9	2256	38	2579	17.7	2533.699656	11.97737933			331	5	350.1	4.8	687.1346164	22.2717898					408	4	441.6	2.8	1757.6406	17.97388867	2045.4	7.3	410.6	5.4
1692	92	433.6	4.5	900	13							2434	12.3	914.4	49.3	2069	116	2668.5	13.6	1930.655367	9.27364781			335	10	402	4.9	687	7					408	4	441.6	13.9	1555.028935	10.83242245	2045.4	12.5	410.6	2.1
1474	88	433.9	4.7	933	11							2446.9	14	932.3	34.1	2119	36	3517.8	12.1	2567.010946	15.89514686			338	7	404.8	5	676	7					407	4	441.9979171	7.730429364	1818.055655	9.677902807	2045.8	8.5	411.3	5.1
1565	101	433.9	5.3	938	22							2455	12.4	933.9	11.2	2092	20	156.2	1.8	2390.657261	11.91371738			347	7	413.8	5.1	643.343542	4.077829138					407	4	442	15	1111.452862	16.73406099	2063.5	6.4	412.2	5.5
1573	69	434.2	4.7	980	14							2462.3	14.8	946.8	9.2	2358	39	236.4	2.5	1964.066954	72.74144269			349	4	422.1	5.3	643	5					406	5	442	17.4	1796.347037	9.576319257	2065.7	12.6	412.9792638	4.318444827
1508	51	434.3	4.8	1210	69							2484.7	14.1	952.3	14.9	2458	135	239.8	2.9	1932.097319	12.28931292			352	9	425.1	5.6	637.1071478	20.05686521					406	5	442.2	3.8	1873.248567	10.40688032	2067	7	413.1	4.25
1586	71	434.3	4.8	987	81							2486.1	13.7	967	17.8	2395	28	249.9	2.8	2483.043078	10.34213359			358	6	426.2	6.3	636.0694066	2.838303076					406	4	442.4	12.6	1783.561778	12.9669412	2083.4	11.7	413.5	5
1748	52	434.7	4.9	1298	143							2493.7	12.5	969.9	20.8	2231	44	252.2	2.8	2382.146353	20.35404657			370	6	427.7	5.4	628	7					406	5	442.5	7	1775.594749	12.69792297	2093.2	11.6	413.6	5
1551	59	435.4	3.5	1365	65							2508.2	13.6	978.6	13.1	2371	29	253.5	2.8	1919.621531	80.13073115			373	6	432.6	5.9	618	7					406	5	442.6	13.8	1929.041808	10.73499685	2095.1	12.2	413.6	5.1
1785	50	435.9	4.5	1233	60							2592.3	11	986.4	9.4	2415	25	261.6	3	1960.029189	17.81706459			373	7	438.6	5.5	617	5					406	5	442.84441	7.566215108	1916.735852	9.358276707	2103	10	413.8	3.15
1789	94	436.1	4.6	1436	66							2695	14	996.6	51.3	2244	46	262.1	3.1	1726.998379	111.7458976			374	7	440	5.8	591	6					406	7	443	4	1783.864726	16.29084342	2105.4	11.5	415.2	5.1
1693	76	436.7	4.8	1461	89							2700.4	15.3	1016.4	12.4	2190	130	262.2	2.9	2099.709122	8.95884993			376	6	441.2	5.7	581	3					405	6	443	8.4	1774.523428	14.29725714	2112.8	9.2	415.9	5.2
1765	117	437.7	3.7	1731	86							2811	16.4	1061.7	89			269.5	3.4	2228.804071	16.32288577			376	6	441.2	5.9	565.2290259	23.15878429					402	4	443.1291259	4.061104148	2512.348516	11.64563238	2114.5	12.1	415.9	2.15
1694	73	438	4.9	1818	69									1088.3	18			272.7	3.5	1918.920654	17.10744088			381	6	443.2	5.5	562	6					402	5	443.2	20.7	1892.772878	11.41180402	2122.6	11.4	416.2	4.7
1815	62	438	4.8	1665	57									1129.4	14.3			276.6	3.7	1854.868561	25.09744976			385	5	444.9	5.9	558	6					402	5	443.3	10.3	2547.81834	8.503080173	2126	12	416.8	5.6
1829	50	438	5.2	1755	81									1145.4	14.2			280.4	3.1	1825.619334	24.53909173			395	7	449.9	5.7	557.7334046	7.711476658					401	5	443.4	9.1	1099.15487	16.31787356	2131	11	416.8	5
1834	89	438.1	4.7	1800	67									1159.2	20.4			280.4	3	1935.631164	22.77902362			397	7	451.1	5.6	556	7					401	5	443.4	15	2602.315983	15.2357384	2132.2	15.3	417.1499202	4.195835569
1806	84	438.4	5.4	2078	33									1190	14.4			286.6	3.1	2236.747926	11.32796286			398	4	451.7	6.3	551	6					401	5	443.6	25	1667.24844	16.84950632	2132.4	15.3	417.5	4.9
1777	42	439.8	5.2	1880	91									1194	23.6			288.4	3.3	1888.700354	24.40943585			400	6	453.7	5.7	547	7					400	3	443.7	13.6	1231.473421	17.61562039	2146.6	7.1	417.8145581	9.174234062
1886	117	440	4.9	2139	58									1201.9	16.4			290	5.1	1892.189594	10.72989981			405	5	454.7	5.6	543	7					399	5	443.7253823	7.805666417	2381.696187	16.35711927	2150	17	418.4	3.9
1819	52	440	4.8	2450	64									1230.1	18.6			309.2	3.6	2477.851001	8.699096075			409	6	455	5.6	542	4					399	5	443.9	6	1461.2342	20.79715205	2151.3	6.7	418.4791276	5.886843987
2066	77	440.5	5	2998	52									1258.3	25.1			327.2	4.7	2434.098651	14.12186348			410	5	457	6.3	534	6					399	6	444.0668624	7.952590207	1802.046378	9.931425305	2154	10	419	5.6
1852	36	440.8	4.7	26	1									1281.3	88.1			329.4	3.6	1942.280555	22.73208655			412	9	457.1	5.9	532	7					398	4	444.0841926	9.868467634	2381.167833	29.01454102	2158	6	419.3	6.3
1874	58	441.3	4.9	181	7									1303.3	13.6			333.3	3.6	2480.661309	15.97368252			416	7	458.9	6.5	523	7					398	11	444.1	12.7	1720.054743	12.55034244	2161	11	419.5	5.3
1875	38	441.3	3.6	242	4									1368.2	10.9			410.1	4.6	2452.731237	8.946053436			419	7	460.9	5.8	521	6					398	6	444.3	9.4	1887.905245	17.17263304	2174	21	420.2	5.1
1977	64	441.4	4.9	250	6									1437.4	17.9			412.3	4.5	1836.452457	19.35561332			430	6	460.9	6	520	5					398	7	444.3106006	9.379151712	1848.686786	11.13412385	2177.6	11.4	420.5328183	9.475154971
1922	61	441.5	4.9	252	4									1439.8	11			412.5	4.4	1746.264465	88.53614833			431	6	461.2	6.1	519	10					397	5	444.5	18.4	2083.393354	9.872549587	2179	11	420.6536032	9.47510292
2044	75	441.7	4.7	258	5									1453.4	15.7			419	4.5	2453.399211	9.491999908			433	24	462.5	6	517	6					396	4	444.5	13.6	2511.707018	16.0357549	2181	23	421.7	5.1
1920	63	441.9	5.1	269	5									1460.8	18.2			434.6	5.1	2046.280394	12.04699428			434	6	463	6.2	512.901511	13.20181658					396	5	444.5	9.9	1787.351142	17.58117673	2187.7	10.5	421.740566	4.677039805
2121	35	442.1	3.6	286	7									1464.1	15.6			441.8	4.9	2798.474333	13.29049826			438	8	463.8	6.1	512.834551	4.93222062					395	5	444.5007509	7.70515496	2200.332519	44.19699584	2198	32	421.8	2.85
2084	53	442.5	3.5	311	7									1469.1	26			447.2	5.4	2507.556331	9.407132277			438	7	471.1	6	512.4753657	6.158869896					395	4	444.6	15.3	2494.001955	10.2850511	2203	11	422.3	5.3
2475	75	442.7	4.9	320	5									1558.5	12.4			449.7	4.8	1425.575459	19.05273418			446	6	472	6.7	512.397289	15.79202633					393	4	444.8163186	6.216096937	1666.467075	14.06913705	2216.3	11.9	422.5	5.1
2309	39	442.7	4.8	346	6									1584.9	16.5			452.8	4.9	1851.677635	312.0716669			447	6	472.3	6.4	512	5					393	4	445.1	13.7	1881.11656	73.02375007	2221.3	13.4	422.9	4.8
2411	41	443	4.9	355	6									1592.9	14			453.8	5.2	2002.559464	11.96828643			450	8	473.2	6.2	509	5					390	5	445.1	12	2328.453361	19.77889897	2222	7	423.1	4.6
2453	66	443.1	5.3	365	9									1598	16.3			463	4.8	1647.813824	629.3337069			463	7	473.6	6.1	509	5					388	4	445.3	10.4	327.6002783	8.526442492	2225.2	6.9	423.6	5.3
2248	32	443.2	5.2	382	6									1636.7	23.2			468.4	4.9	2467.026292	13.32380355			488	7	513.9	7	508	6					388	4	445.3	4.4	277.858109	8.004399349	2228	12	423.9	5.4
2388	135	443.9	4.9	394	6									1647.3	28			468.8	5	2578.617321	10.93573796			503	6	526.8	7.4	507	6					388	4	445.3035665	7.592812417	245.4145584	5.971897745	2228.8	7.7	424	5.3
2555	87	444.4	4.9	395	5									1656.5	13.8			474.4	5.4	1890.914512	178.7282527			515	9	552.2	7.3	507	9					387	5	445.4051904	5.840019459	275.8882315	6.009378425	2233	11	424.1	5
2315	56	444.6	4.7	401	7									1665.5	10.2			490.3	5.4	1932.994715	14.49983513			529	13	674.9	9.9	506	6					385	4	445.4705909	7.945991733	454.2373768	9.134952143	2241	11	424.2	5
2329	60	444.6	4.6	402	7									1685.2	14.9			495.9	5.2	1801.189477	11.23080987			654	16	722.3	8.8	503	6					385	7	445.5	8.4	269.4016144	10.0974878	2259	11	424.3	4.9
2491	58	445.1	5.1	418	9									1688.7	19.9			822.2	9.6	1930.013188	11.8650121			790	10	752.9	9.3	503	4					384	4	445.7	5	446.414488	10.64644849	2260	12	424.7	5.9
2541	61	445.1	4.1	422	7									1710	14.7			933	9.2	1849.103628	174.8552177			794	13	783.8	10	500	4					384	5	445.7452316	7.288652618	434.7666474	9.141206397	2278	11	424.7	5.2
2304	66	445.3	4.8	426	6									1727.3	21.6			959.3	9.8	2327.651201	16.32520829			799	11	854.3	10.3	497.793823	20.22839342					384	5	445.9055801	7.503241392	277.6313277	4.465567285	2278	23	424.8	5.1
2520	65	446	5.1	431	8									1758.6	18.1			978.7	9.9	1804.984411	36.25334443			869	12	856.3	11.2	494	6					383	4	446.2164025	6.486477975	334.2764102	5.938349721	2283	24	425.7	5.9
2531	59	446.3	4.8	434	6									1810.3	11.8			1036.7	10.5	1818.175263	50.07450197			911	14	930.3	11.6	494	6					383	5	446.4	9.8	231.1425919	7.521849577	2283.1	12.4	425.8	5.1
2520	34	446.6	3.5	437	7									1844.2	48.2			1161.1	9.9	2080.464917	283.973848			928	12	955.2	11.3	494	6					382	4	447.5380363	7.203346315	279.9382704	7.488971162	2289	11	426.1	4.9
2546	37	447	5.1	439	8									1849.1	14.6			1252.4	11.2	1878.170325	14.34475579			932	14	957.1	11.3	493	5					382	6	447.7	11.4	268.9012871	10.5732263	2294.3	12.7	426.6	5.4
2504	44	447.1	4.9	448	7									1862.6	16.9			1272.7	13.6	2374.596907	39.34636912			927	11	960.7	11.5	492.0310935	4.325765488					381	4	447.7717836	8.317584165	241.0001634	5.566540056	2297.4	11.5	426.6	5.6
2765	72	447.1	5.4	455	7									1868.5	11.2			1663	12	1949.722634	17.25919221			897	17	970.3	11.7	491	5					380	4	448.3	9.6	311.3661279	11.39166508	2297.8	12.5	427.1	5.3
2667	46	447.3	3.4	456	10									1873.9	10.7			1667.4	16	2482.53064	13.21122314			845	21	980.6	12.6	491	6					379	4	448.4	16.4	265.073062	6.703260038	2298	10	427.1	4.9
24.1	0.7	447.4	3.8	460	7									1881.7	15.9			1676.2	11.3	1941.172555	18.23125143			821	15	1419.6	9.7	490.9533043	4.152341839					379	4	449.4	8.6	285.0329922	6.736177018	2303	18	427.1	6.5
37	2	447.5	4.9	460	8									1883.2	15.8			1689.1	14.5	1628.357352	283.4618432			813	11	1494.8	10.5	490.791686	5.677719889					379	6	449.4242561	6.531213741	326.3389325	9.169647463	2306	27	427.7	5.6
49	2	447.6	4.9	461	7									1884.4	15			1696.7	10.3	1893.79905	344.496447			803	16	1530.6	9.6	489.0575812	2.551633776					378	4	449.5	10.7	442.1421518	12.49173975	2306.6	13.9	428.2	5.2
55	1	448.7	4.8	470	10									1885.9	14.3			1701.5	17.3	2159.688621	69.41627724			622	14	1570.3	13.7	488.8379923	8.779701759					377	4	449.7	19.8	304.5158878	7.21155115	2308	11	428.5	4.85
59	3	448.8	5	474	8									1893	18.5			1717.3	26.8					594	11	1611.9	10.9	488	5					377	5	449.8403821	7.066202054	450.8909169	15.45080933	2308.2	8.3	429	5
99	2	449	4.8	487	8									1898.3	35.8			1726.5	20.8					574	8	1705.9	10.3	488	5					377	4	450.4	16	325.4365954	6.545826009	2311.8	11.2	429	4.8
102	2	449.2	4.9	497	8									1913.1	13.8			1728.4	16.4					525	8	1737.9	9.9	487.2756112	2.484773301					377	4	450.5	11.9	498.7547167	13.55384097	2315	11	430.1	4.9
120	2	449.3	5.1	530	12									1934.6	12.2			1764.8	11.6					495	7	1741.6	12.6	487	5					376	3	450.8754715	8.511735945	439.9068319	11.67979057	2316	11	430.2	6.2
150	3	449.8	4.7	598	7									1935.5	16.1			1799.2	11					489	7	1780.3	9.6	487	6					376	5	450.8885374	10.03422415	266.8742765	4.639396261	2318	11	430.5	5
184	4	449.8	3.7	613	11									2019.9	20.6			1812.6	11.7					922	13	1790.3	12.6	485.9614175	3.182706071					376	6	451.5	11.6	270.3652903	6.682608735	2321	11	430.7	5.4
199	5	449.8	5.2	650	12									2023.8	23.2			1847.6	11.6					458	11	1808.3	10.2	484.8876908	5.862444525					375	4	451.6	10.3	282.4355376	8.088417459	2321.3	6.8	430.8	4.05
200	4	449.9	5	670	13									2028	18.3			1853	11.4					915	11	1828.6	9.5	484.8852048	10.49681548					375	3	451.8766657	9.757635895	446.786602	10.76947832	2324	7	431.6	5.2
203	5	450.6	5.2	688	14									2032.3	15.9			1861.3	12.8					457	6	1833.7	9.8	484.1816182	9.270972681					374	4	452.4	11.5	467.23252	10.38093885	2328.6	7.3	431.6	5.3
203	4	451	5	709	15									2035.8	66.8			1882.9	10.4					896	14	2070.5	11	484.0358277	3.398300119					373	4	452.6	24.8	468.0445433	13.38310783	2330	12.2	431.8	5.2
203	4	451	4.9	712	10									2060	27.1			1885	14					446	6	2113.3	11	484	4					371	4	452.6168504	7.596843299	298.6060068	6.547318669	2332.1	7.3	432.2	5.5
208	5	451.7	4.9	742	39									2258.3	36.9			1903.2	10.3					439	6	2132.7	11.2	484	5					370	4	452.7	9.5	454.7948052	13.02458449	2335.7	12.4	432.3	5.7
211	4	451.7	4.9	750	17									2300.4	25.2			1906.4	14					866	53	2415.9	11	484	5					369	4	453.2	6	431.9948076	8.688541756	2337.2	10.8	432.5	5.5
214	5	452.2	4.9	779	13									2372.6	16.7			1912.7	13.6					417	6	2449.2	13.9	483.8102437	11.82904532					369	5	453.4625005	8.826258324	458.8804728	10.56181932	2338	10	432.7	3.45
219	4	452.5	5	786	12									2460.2	15.8			1941	12.9					412	6	2515.4	10.8	483	6					368	3	453.9	10.3	463.8887127	8.33034966	2339.1	12.4	432.720685	9.952139358
220	4	452.6	4.4	789	13									2466.6	11			1999	13.9					409	7	2689.3	11.7	483	6					368	3	453.9	16.9	261.037691	6.018816065	2340.3	6.6	433	5.3
221	5	453.1	4.9	800	9									2470.1	15.2			2003.5	12.4					400	6	209.6	5.1	481	5					368	3	454.1	15.5	502.3606859	7.233979626	2341.1	7.4	433.3	4.9
232	5	453.5	3.4	843	20									2471.9	23.3			2147.8	12.2					397	6	219.7	3.1	480.625739	7.527589582					366	3	454.3	35.2	485.8077983	12.23364738	2341.8	6.8	433.5	2.55
232	4	453.8	5.1	865	14									2478.3	19.5			2206	14.3					392	7	220.4	15.1	479	6					365	4	454.4	30.4	266.7042376	8.972749724	2344	12	433.9	5.5
235	4	453.9	5.2	870	12									2487.5	10			2223.4	12.5					388	5	220.8	7.3	479	6					365	4	454.6006003	8.105750682	443.0486643	11.60938029	2345.1	11.5	434	9.5
235	5	454	5	886	9									2489.6	11.2			2416.8	12.8					385	6	238.5	4.8	478	6					363	4	454.9	9	447.0960487	11.50505452	2346	11.3	434.1069523	8.926917254
241	5	454.3	5	894	13									2492.6	42			2484.3	11.7					382	4	244.7	8.1	477	5					361	4	455.1	15.4	279.4050295	6.479298767	2346	11	434.6	5.3
245	5	454.4	5.3	904	15									2493	22.7			2488.2	14.3					382	6	246.9	2.1	476.4109951	5.450651508					360	4	455.7618741	8.479960564	286.247069	9.101472352	2347	10	434.7698443	4.369522898
246	5	454.4	5	909	38									2495.1	9.6			2490.8	11.8					379	5	249.6	3	476	4					360	4	456.5882563	8.430250794	428.1956993	15.02473588	2347.3	6.8	435.2	5.4
249	4	454.4	5.6	922	12									2504	10.9			2495.4	12.6					379	13	250.2	13.8	476	5					360	4	457.1	14	460.0979408	7.931072738	2349.9	7.7	435.2	3.1
254	5	455	5.2	923	11									2514.3	13.4			2510	12					378	6	268.2	3	476	5					359	6	457.1020688	8.400076737	519.6908167	16.28326933	2351	11	435.3	5.2
255	5	455.2	5	936	24									2524.6	13.1			2531.8	14.5					378	6	287.2	6.3	475	4					356	3	457.1908207	9.004155702	443.822007	10.44236984	2353.3	7.2	435.4	5.1
258	4	455.3	5.2	947	12									2534.1	15.8			2655.2	13.2					378	10	292.3	1.8	475	5					356	9	457.6	9.8	283.7746554	6.866474872	2355	23	435.4	5.4
260	5	455.4	4.8	975	18									2627.1	57.9			2658.9	14.2					372	6	363	12.5	475	5					355	5	457.7	16	279.6767646	7.938166234	2355.8	7.2	435.6	5.2
264	5	456	3.4	1094	85									2669.3	25.7			3453.4	11.9					371	6	387.2	7.6	475	6					355	6	457.8379357	7.180961617	272.0672196	8.272231479	2362	11	436.2159176	4.127915964
269	6	456.8	4.9	1294	164									2671.5	11.2			68.6	1.3					371	5	388.4	7.4	475	5					353	4	458.1	23.3	456.397003	9.625221253	2364	8	436.3	5.2
270	6	457.1	4.9	1239	54									232.5	4.5			164.5	1.8					365	5	390.9	6.4	474.0403964	7.031443828					352	3	458.1	11.9	464.2283618	22.95369577	2364.2	8	436.8	5.6
271	7	457.8	5.2	1387	69									404.5	12.9			204.8	2.3					701	13	393.3	7.9	474	6					348	3	458.5	11.5	255.0812318	7.632012575	2365.9	18.8	437	5.5
273	6	457.8	4.9	1544	32									958.3	25.4			211.7	2.2					347	7	396.5	23.6	472	5					347	9	458.9620441	8.365731063	292.6016436	9.810008052	2366	12	437.1	5.1
273	6	458.6	5.3	1681	74									446.7	4.5			215.4	2.6					340	4	399.6	14	472	9					346	4	459.1	15.5	334.9523602	8.359015653	2367	11	437.2	4.9
273	5	459.8	5.3	1569	61									524.7	8.6			220	2.4					333	5	404.2	5.4	472	6					346	4	459.1	17.3	458.9457194	9.753930491	2370.2	6.6	437.5	5.1
273	6	460.2	5	1546	48									433.5	16.5			227.6	2.4					328	5	405.4	18.3	472	6					346	4	459.4641054	6.789676331	273.4191689	6.186010931	2374.3	7.6	437.5	5.1
276	6	460.3	5.5	1565	60									320.2	11.4			237.2	2.7					325	6	408.4	13.6	471	5					346	4	460.0170146	9.974510357	472.1716907	9.297686116	2377	10	437.5	5.1
283	5	460.7	5.3	1476	89									532	3.9			255.2	3.5					320	6	408.8	4.2	470	6					344	4	460.1	6.7	466.5912528	18.61422031	2380	12	437.5	5.1
283	6	461.1	3.5	1769	63									330.6	15			258.3	3					624	11	409.5	12.4	470	6					342	3	460.3542609	9.83247668	507.393517	12.72432937	2380	11	438.0230533	9.467627776
287	7	461.2	5.2	1546	64									255.6	2.4			262.9	2.9					307	5	416.3	8.7	468	6					341	4	460.4190231	8.383807299	942.4110775	13.32634251	2381.5	7.6	438.1	4.9
289	7	461.3	4.8	1844	75									421.7	9.2			264.5	3					302	5	417.3	12.3	468	5					341	4	460.6	12.7	445.8404893	7.22388484	2383.5	11.8	438.4	5.5
292	7	462.1	5.1	1783	52									445.6	12.4			269.6	4.2					906	11	417.4	1.4	467.5163758	5.159432921					341	5	461	13.2	480.0672048	14.96790504	2385	9	438.6	5.4
299	5	462.7	5	1669	55									471.4	8			269.7	3.7					905	12	418	3.5	467.1181206	5.924432513					338	3	461	10	273.4355669	7.503013535	2390	54	438.7	2.7
306	9	463.6	5.3	2017	60									529.1	8.4			269.9	3					300	10	420	18.5	467	5					338	5	461.2	16.5	272.8136284	10.3765027	2390	12	438.8	5.5
308	7	463.8	5.3	1809	69									326.3	10.2			270.5	3.8					594	8	421.6	9	466.4993988	2.975667455					338	4	462	20.5	487.2097655	15.93297179	2391	8	439.8	5.5
309	5	463.8	5.7	1921	76									458	10.6			274.7	3.6					296	4	429.9	8.2	464.721545	3.06759281					337	4	462.3	19.5	959.4016958	45.3732319	2391.3	15.2	439.8	5.1
309	6	464.2	5.6	2352	63									470.6	6.9			275.3	3.5					880	12	432.1	7.3	464.1880827	3.860374574					336	3	462.3862732	6.443668512	444.9011517	12.01876404	2394.1	13.5	439.8	5.4
312	5	464.4	5	2440	54									328.7	5.7			286.2	3.3					865	15	439.2	6.1	464	5					335	3	462.5	13.7	949.9067028	17.78033419	2395	7	440	5.3
338	7	464.7	5.2	2309	57									474.4	12.9			288.5	3.3					571	9	441.1	9.2	463.6298569	18.62031796					334	4	462.5616511	8.26352281	280.0338139	5.703333034	2395.9	13.2	440.0705281	9.286117092
346	7	465.4	5.3	2406	68									436.9	4.4			290.3	3.2					282	7	441.8	11.6	463.3851619	2.317662292					334	6	462.8160709	5.285092346	451.4839317	9.046375451	2401	6	440.1	5
355	6	465.5	5.1	2607	91									282.3	12.5			292	3.2					276	6	442.9	6.5	463	5					331	4	462.9	9.1	966.0382442	17.2351174	2401.4	6.9	440.4	3.6
359	7	465.8	5.3											476	9.8			293	3.2					544	9	444	4.6	463	5					329	4	463.5	34.4	521.190009	18.15841277	2404	11	440.5	3.85
360	7	466.1	5											457	7			293.4	4					271	5	445.8	15.7	463	5					329	6	463.5322117	7.714470638	448.30961	11.99778408	2405.9	12.9	440.7	4.45
360	7	466.3	5.2											335	7.7			294.8	3.4					271	5	447.6	7.1	462.489934	16.9423836					327	4	463.7	14.5	455.4372834	14.23042248	2409	11	440.8	5.1
372	6	468.2	5.2											534.6	18.6			311.6	3.6					269	6	452.4	6.1	462	5					325	4	463.8	15.9	453.4910251	8.689520563	2412.3	12.8	440.9	2.65
373	8	468.7	5.3											249.5	7			311.9	3.9					536	10	453.4	18.7	462	4					325	4	464.7	12.7	443.9254007	10.21121953	2412.5	8.2	441	3.4
377	8	469.1	5.2											949.2	61.9			315.4	3.7					265	7	454.9	12.6	462	5					322	4	465.8258213	9.046649285	446.8501385	8.790717062	2413	11	441.6	5.8
382	6	469.3	5.2											462.8	3.6			330	4.6					265	6	457.6	23.6	461.4726951	1.869902321					321	5	466.0490103	6.146111669	435.669641	8.224556098	2415.4	12.7	441.8	5
386	8	469.7	5.6											327	10.2			335	3.6					523	8	460.1	8.6	461.3455251	12.90280907					320	4	466.1	11.7	277.3976948	5.952299867	2415.8	12.3	441.8163899	4.366494546
386	7	470.2	5.3											422.3	17.5			338.1	3.7					260	5	466.1	9.2	461	6					320	4	466.4978465	6.460591535	941.6175898	14.33918609	2417	13.6	442.3	5.5
389	7	471.6	5.1											349.8	21.8			343.3	4.1					257	5	466.6	4.3	460	5					320	10	466.6	8.4	428.2897298	15.10578284	2417.1	12	442.6	2.35
391	8	471.7	5.4											466.4	22.9			349.6	3.7					514	9	469	6.2	460	5					319	4	466.7548311	8.746486033	274.6883088	6.425510103	2418	10	442.8	4.35
391	6	471.7	5.4											442.5	16.7			351.3	3.8					255	4	472.2	10.4	458	5					319	4	467.0009545	19.76776889	823.1857309	22.48134365	2419	37	443.4	2.55
393	8	471.7	5.2											443.3	7.9			359.4	4					745	13	472.8	6.7	457	5					319	4	467.5	15.9	936.2976961	27.38708443	2420	7	443.9	5.5
395	7	472.1	5											266.4	5.9			375.7	4					247	4	473.8	5.8	457	5					318	4	467.8928435	7.902852493	433.8669777	8.92528697	2420.1	7.4	443.9	4.9
396	10	473.2	5.2											98.1	0.6			376.2	4.9					247	5	479.5	8.1	456	6					318	5	468.0645512	8.57078759	940.8133317	21.38899963	2421	9	443.9	5.3
398	7	473.3	5.2											490	11.7			402.3	4.4					488	7	479.9	6	456	21					317	4	469.2	9.7	599.9915198	16.3618647	2422	11	444.2	5.4
399	7	473.8	5.2											229.5	8.3			406.7	4.1					732	11	486.4	4.3	455.9543993	2.887332173					316	4	469.878062	8.345269103	459.6932487	8.228960011	2424	11	444.2236996	9.886164677
401	7	474.1	5.2											839.6	8.5			408.3	4.3					243	3	490.5	3.7	455.7466284	5.559111809					315	5	470.4	17.1	494.9846952	12.20434928	2427.8	8.1	444.3	4.15
403	8	474.5	3.9											438.4	18.4			409	4.2					485	7	533.7	12.2	455.309436	10.20832392					314	4	471.4	11.4	476.3194298	6.678863394	2428.7	6.7	445.2	5.1
403	7	475	6.8											357.2	13.1			410.7	4.2					722	25	537.8	21.8	454	5					313	3	471.5	12.6	924.0123407	20.33565567	2428.9	12.4	445.2465341	9.705172833
403	11	476	3.5											238.9	13.6			413.6	4.4					239	3	553.4	9.9	454	5					311	2	471.5144935	9.66588523	919.2333258	18.02111309	2429.6	11.2	446	5.5
405	7	476.7	5											434.2	13.2			417.8	4.5					950	15	629.2	18	452.7284716	5.57876848					311	4	472.2	5.8	288.7848122	4.565676934	2431	6.4	446.3	5.8
407	7	477.8	5.5											415.3	8.2			417.8	5.2					236	5	717.6	22.4	452	5					309	3	472.9	10.7	490.5925595	11.55830538	2432.1	16.1	446.5098115	4.364479318
409	8	477.8	5.1											469.5	5.8			421.6	4.4					236	4	748.8	19.2	452	5					309	8	472.9706653	6.794437327	431.0883028	12.54682153	2434	11	446.9	6.3
414	8	478.1	5.1											192.4	9			427.7	4.8					936	13	801.1	7.2	452	5					308	4	473.4	5.5	938.7586635	23.59809688	2434	11	447.4	5.4
416	9	478.3	5.4											254.5	2.9			432.2	4.6					233	5	821.7	26.8	452	5					307	4	473.4	12.3	934.6363506	16.16521123	2434.7	11.7	447.4	5.5
416	8	479.9	5.4											301.5	6.9			442.1	4.8					233	5	834.2	17.7	452	5					306	3	473.7	12.2	397.6680234	7.967428074	2435.4	16.6	447.9	5.5
417	7	482.6	5.6											432.8	5.7			447.3	5.1					456	12	849	15.9	452	6					304	4	474.4494767	7.334790281	941.0820173	15.93806261	2437.3	6.8	447.9	5.1
419	9	482.6	5.2											456.1	7.5			453.8	4.8					227	3	849.9	24.3	451	5					304	5	475.0703411	7.340947166	455.0723336	10.95917185	2437.6	6.9	448	5.3
419	8	483.3	5.3											505	15.1			454.4	5					451	7	855.3	7.5	451	5					303	5	476	6.6	776.1779325	15.18775991	2438	12	448.1	5.2
419	10	484.2	5.4											475.1	19.6			454.6	4.9					670	34	858.4	10.7	450.6510886	14.94227802					301	4	476	10.7	277.0020667	7.752898094	2438.5	5.9	448.2	6.2
421	7	484.7	5.3											489.8	15.2			457.2	5.2					865	15	870.2	13.9	450	4					298	5	476.8414177	8.053547196	502.0034451	13.15353114	2440.9	12.5	448.2	3.9
421	9	485.1	5.5											850	34.5			458.9	5.2					215	4	882.2	12.9	450	6					297	5	477.5	15.4	926.0717913	15.27867615	2443.5	12.7	448.4	6.1
422	7	485.5	5.6											206.2	7.6			462.1	5					215	5	898.1	7.3	449	5					296	3	478.3091539	8.298226587	907.0880963	19.44731222	2444	6.7	448.4	2.5
423	8	486.8	5.4											372	13.4			462.8	4.7					427	6	916.4	38.5	449	5					295	6	478.8	17.8	931.4574912	16.67611151	2444	11	449	6
425	7	487.2	5.1											436.4	24.4			462.9	4.7					213	2	925.3	45	449	4					291	4	479.3006723	8.843171615	877.8605058	17.29841505	2444.6	6.9	449.1	2.4
425	8	487.8	3.6											433.8	5.5			476.6	5.1					426	7	932	21.1	449	5					290	4	479.652654	7.415654061	439.9817282	12.62140708	2445	10	449.2	5.8
427	8	489	5.4											413.7	26			484.4	5					424	7	1133.8	41.9	449	5					288	4	479.8	21.6	267.3392048	5.729423999	2451	11	449.2	5.2
430	8	490.2	5.9											237.5	4.8			486	4.9					423	7	1145.2	19.9	448	4					286	3	480.5	33.7	468.4319162	9.92226318	2451.2	15.1	449.6	5.8
430	8	491.6	5.2											440.6	13.5			486.1	5.6					210	4	1175.6	65.8	448	5					286	3	486.1252225	7.926612203	412.7711664	14.21904899	2451.5	13.8	449.6	5.4
433	8	493.1	5.6											258.5	20.4			489.1	5.3					420	6	1187.8	19.8	447.972261	3.399157875					285	3	491.2	14.8	271.2477389	7.312516288	2451.7	8.1	449.9	5.8
433	7	493.2	5.4											405.7	10.5			489.6	5.2					209	4	1197.6	20.9	447	5					285	4	491.984606	5.081596568	291.7009497	7.421078734	2453	6.8	450.4	5
433	11	493.7	5.4											199.5	6.9			507.2	5.1					208	4	1584.6	21.7	447	4					285	5	495.2385057	6.397841302	939.6596812	23.0093667	2453	6.4	450.5	5.2
434	8	493.9	3.8											295.8	11.8			518.8	5.4					416	7	1618.9	18.7	447	4					284	4	495.4	14.1	277.3474923	4.848364186	2453	11	450.6	2.6
435	8	494.4	5.4											277.3	4.6			530.3	5.3					414	6	1706.7	18.4	446	5					284	4	498.3	12.3	295.5277017	6.633059186	2455	9.8	450.7	6
438	8	495	5.3											240.9	5.2			548.5	5.5					413	5	1741.5	18.3	446	5					282	3	501.5	25	915.9732842	22.5603709	2458	11	450.9	5.5
439	8	495	5.4											982.8	30.1			667.8	6.7					411	6	1784.5	23.9	445.9861339	4.387820726					282	4	501.5879088	7.525754324	437.3276378	12.63655659	2459	7	452	5.6
440	8	495.9	5.5											379.3	14			671.2	7					205	3	1972.6	31.7	445	6					282	5	503.7	29.9	908.2747603	30.28832326	2460	11	452	5.3
440	9	496.1	5.2											495.2	14.7			731	7.1					409	6	2009.7	17.8	444.9098066	4.516977562					281	3	506.9218957	8.489338715	269.8363628	7.168537104	2462	11	452.4	5.3
442	8	498.4	5.2											280.2	10.5			747.5	7.3					203	3	2306.4	38.5	444.554412	1.800758355					280	3	509.8	6.9	438.2144838	9.110943866	2462.2	11.8	452.6	5.2
443	8	499.3	5.3											271.3	12.2			814.8	8.9					405	5	2607.6	16.7	444	5					280	5	510.7749616	8.747301903	925.2836557	29.1316	2462.5	13.8	452.8	5.2
444	7	499.4	5.8											420.8	15.1			946.8	9.1					405	7	2636.8	16.6	444	5					280	5	512.1	26.8	280.3575396	6.204799824	2463.8	14.9	454.92534	9.64058809
446	7	499.8	5.3											260.4	7.5			976	11.1					202	4	2760.2	16.4	444	5					278	4	513.5	13.9	440.1868061	14.5456801	2464	12	455.5860948	8.0785823
448	8	499.9	5.4											470.6	22.1			1043.6	11.2					404	9			443.6403497	4.618872344					277	3	515.7480614	9.089099289	446.8676135	12.44938424	2465.6	14.7	456	5.2
449	8	501.1	3.9											424.2	11.2			1522.3	14.7					199	3			443.2508283	7.214860116					277	8	518.7303815	7.965131046	893.596631	13.51038875	2467.3	7.7	456.3068411	9.099427905
450	9	503.7	5.2											30.5	0.5			1673.1	14.1					597	25			443.1794404	4.806158048					276	3	526.4827657	8.483318456	426.2114554	10.33245281	2468	11	456.7	3.7
451	8	504.9	5.5											456.1	22.1			1683.3	13.1					594	12			443.1704237	2.590479116					275	3	542.4	13.1	885.2775114	27.74460347	2468.5	14	457.2076605	9.879747877
458	9	506.5	5.5											311.9	20.6			1731	12.3					788	10			443	5					274	4	559.1855695	9.878883864	907.9928883	16.34786739	2469.3	7.1	457.3277603	9.279195422
459	10	506.7	5.5											206.5	12			1757.5	16.5					392	6			442.7507709	3.19540545					274	4	559.687677	15.98401766	441.4847781	14.4474001	2469.8	11.4	457.9	3.6
462	9	510.7	5.8											205	7.7			1843.9	11.8					977	28			442	4					274	4	568.1	13.4	245.9712065	4.791904469	2470	11.5	458	7
463	9	511.5	5.7											505.3	4.5			1854.8	11.8					389	5			442	5					273	4	596.1	10.8	501.5485579	12.90342715	2470	11	458.6	5
464	7	512.3	5.4											425	14.9			1876	16.2					389	6			441.515413	15.16972206					272	4	612.6	20.3	498.0028965	9.131448153	2471.3	7.2	459.4	5.3
466	9	513	3.9											595.8	22.1			1882.7	11.2					191	3			440.5794499	2.116099128					270	4	623	17.6	886.7353154	17.09702653	2471.8	12.1	459.9693888	9.098063389
468	11	513.2	5.7											436.6	9.5			1888.6	12.7					381	8			440.1991968	5.38994077					270	4	642.9	35.7	459.0893507	12.09643983	2472	11	460	5
475	10	513.9	6.1											525.1	11			1928.3	15.3					762	9			440	4					269	3	684.7922576	13.2562388	830.9753036	21.86587453	2474	12	460.4	5.8
478	10	514.2	7.6											498.4	14			1929.5	14.3					379	5			440	5					268	3	697.2	21.4	246.2030169	4.981950188	2476.1	6.4	460.5	3
480	11	514.2	5.6											398	22.6			1954.1	13					189	4			439.0468237	2.289058985					268	4	715.1383295	16.89390557	644.2138403	16.4090137	2476.7	12.1	460.9	6.6
484	9	514.7	4.2											426.1	4.8			2031.8	13.3					376	7			439	5					267	3	717.6	104.5	446.304334	9.354410236	2477	11	461	5.5
485	8	515.3	5.7											468	18.6			2041.5	15.2					374	12			439	3					267	4	726.1	39.3	477.8396885	10.93756272	2478	11	461.5898524	9.457517681
492	9	516.6	5.4											250.8	8.1			2077.7	15.4					369	5			439	5					266	4	733.9	25.9	851.7084926	20.4893246	2479	11	461.8898936	9.337375534
497	8	517.2	5.6											263.7	6.9			2156.6	13.4					183	3			438	5					265	4	734.8	22.8	412.2450736	10.68747738	2479.9	15.5	462.1	5.5
499	10	519.4	5.7											412.2	6.1			2172.4	13.7					914	15			436	5					264	3	750.7	18.2	835.9546611	16.86382553	2481.1	15.1	462.1899208	9.21724457
528	11	521	5.9											275.6	6.3			2379.6	13.6					363	6			436	5					264	3	752.3	31.6	423.4965981	16.74093463	2482	11	462.4	5.6
530	10	525.5	5.7											86.4	5.8			2380	13.1					363	6			436	5					264	4	755.8	21.5	307.0956941	9.372559489	2482.6	7.5	462.7299345	4.417525139
530	9	531.4	6.2											467	10.9			2402.4	15.5					181	3			435.0595839	6.497281371					264	4	761.3	11.3	680.5721114	28.2369534	2483	7.2	462.9	2.8
581	10	534.2	5.8											280	10			2421.6	14.8					892	11			435	6					263	6	762.2361945	13.58332221	270.4070258	8.59485992	2483.5	7.6	463	5.3
585	9	537.1	5.7											938.5	54.1			2435.7	13.2					535	8			434	3					262	6	764.4282297	14.3533135	736.7887441	28.23526259	2484.7	14.6	463.3	5.6
590	10	543	5.6											204.5	4.7			2465.5	12.8					355	6			434	5					261	3	764.5	15.3	477.7890511	13.35614614	2485	11	463.9	5.6
591	10	552.5	6.4											435.3	16.7			2480.4	12.8					707	10			433.5645353	15.18012284					261	3	764.9	28.4	347.2497461	13.75221166	2489	15.5	464.0497777	9.816384901
595	10	558.5	6.1											268.2	4.2			2550.5	11.9					176	2			433.0528361	2.989109978					259	3	766.3	31.3	455.5885896	14.93269819	2492.7	7.6	464.8	5.2
595	12	566.2	6.1											387	16.7									352	4			433	5					259	4	768.995293	18.7649271	455.362133	11.63036041	2494.2	13.2	465.1	5.3
598	10	572.4	6.8											400	10.7									352	7			433	5					259	4	770.3	36.8	661.1967592	16.39071583	2495	11	465.1	3.5
604	12	577.4	6.1											518.6	13.3									350	5			432.8102159	7.462147551					258	3	772.6	22.4	272.6516108	4.528903976	2495	9	465.3	5.3
607	11	579	6.4											910.7	17.1									873	11			432.7891008	2.200249166					258	3	774.9	49.6	402.1816773	12.24033705	2496.1	11.3	465.6	3.7
621	11	583.4	5.2											404.3	13.4									695	17			432.1063943	3.05749531					258	4	776.8147541	11.94168604	399.5410221	14.20961732	2497	9	466	5.4
624	13	590.6	6.5											255.3	9.1									347	10			432	5					258	4	779.9	12.9	2354.831368	44.70464136	2499	11	466.3	5.5
635	10	592.7	6.4											252.5	5.2									345	5			431.8767241	15.06175864					258	5	781	22	1797.580297	8.672036369	2503.4	12.2	466.7	4.1
638	12	593	6.5											415.1	21.5									514	9			431	5					257	4	783.0272946	16.89937309	2534.945998	9.770614242	2504.5	6.5	466.808577	4.055975126
653	13	594	7.4											462.8	8									171	2			431	4					256	3	783.4	20.5	1491.998409	12.61975966	2507	14.6	467	6.3
657	12	594.5	6.5											406.8	9.3									670	12			431	4					256	3	785	18.8	1581.115748	13.47673058	2508	10	467.6479773	4.355421326
669	12	597.5	6.3											247.6	5.4									502	7			430.7189815	2.38013975					255	3	788.8	16.2	2375.714137	43.31753095	2508	11	468.8	5.5
671	11	599.7	6.2											451.6	23.1									334	5			430	5					255	4	790.8	29.7	1900.942464	10.3646703	2509.4	14.4	469.2065736	9.753951848
684	12	609.1	6.7											305.6	6.6									664	10			430	5					254	3	792.1193606	14.76622676	1171.508524	15.57200347	2514	13	469.4	6.4
684	12	610	6.6											473.6	5.7									330	4			430	3					254	3	795	25.2	1853.944297	11.05028526	2516.2	7.1	469.9	5.4
687	15	610.5	6.5											283.9	4.5									325	7			430	4					253	3	798.2	32.8	2502.331238	10.47253436	2521	8.4	470.7	5.3
712	11	614.3	6.4											435.9	7.1									969	18			430	5					252	4	800.6	14	1692.669417	7.959721143	2523.4	13	471.2441695	4.473722908
719	13	615.5	6.6											453.9	9.4									319	4			429.2297539	18.61027222					248	3	800.7	24.1	1335.003618	16.34452727	2523.8	10	472.2	5.4
737	15	622.4	6.4											452.5	13.1									637	7			429	5					247	3	800.9	59.7	2034.314931	6.99652626	2525.1	12.5	472.3226361	10.05202357
742	13	623.1	6.4											920.5	15.2									31.8	0.5			429	5					246	3	805.1	16	2349.872764	34.71277074	2525.7	12.1	473.1613187	10.41099915
742	14	630	6.5											889	30.5									317	11			429	5					245	2	806.3	28	1774.201015	8.367483065	2527.5	8.4	473.9	6.6
742	15	632.7	5.4											761.4	13									158	3			428	5					241	2	810	15.6	1593.161398	14.19658832	2527.5	12	474	6
762	15	634.9	6.5											269.8	14.1									789	12			427.9717837	4.08247113					241	3	811.5	22.5	1797.840515	9.366725861	2528.2	7.2	474.1	6.3
763	13	635.5	6.8											835.1	19.4									314	4			427.7359082	5.070426431					240	3	826.9	26.6	1891.888976	6.866584762	2531.9	7.3	474.1	5.9
764	15	635.6	4.5											108.9	4.2									940	12			427.0402359	17.74192078					236	3	835.7	30.2	2488.354154	7.817021101	2534.1	14	474.8	6.4
767	15	648.1	6.9											964.3	42.7									312	9			427	5					234	3	836.5281615	11.27728284	1848.185322	9.752345866	2540.6	12.1	475	5.7
768	16	652.3	7.6											871.1	47.2									468	13			427	4					233	5	838.5	14	1515.731333	8.623665062	2542.2	8	475.4	2.55
771	13	657.5	7.2											841.8	36.8									467	8			427	3					223	2	847.1	18	1680.394757	15.74983509	2547.4	14.5	477.7122643	9.809780857
777	12	676.8	7.2											277.6	2.4									464	7			427	4					223	3	855.7816751	22.83073306	2518.062067	5.359489398	2549.1	14.6	478.3	6.2
778	12	678.8	5.6											420.9	9									308	7			427	5					222	2	860.4491343	10.22031554	1498.803403	16.72148362	2550.5	8	478.7	6.9
781	13	679.6	7.8											881.2	11.4									307	4			426.5184318	3.417757257					219	2	866.1494183	14.94528014	1825.069823	10.7462098	2562	37	479.5	5.5
781	16	681.9	5.9											287.8	13.3									307	10			426.2808624	9.847931481					219	2	866.3040098	22.61410233	1488.876986	18.14499281	2574	12	480.3	6
802	20	682.7	7.7											270.4	2.2									457	7			426	6					216	2	870.066616	18.24343069	1604.034169	11.70423951	2576.4	7.2	480.4	7.6
820	13	683.2	7.2											419.5	10.4									758	15			425.7177719	10.76684762					215	2	871.7749811	19.94897141	1583.453721	14.20413599	2630	14.9	480.6	6
823	17	684	7.1											765.2	5.9									907	14			425.0495655	4.260989274					210	3	874.7	54.6	1589.028385	10.37496303	2647.6	6.8	481.6	5.8
825	14	688.3	8.1											370.3	17.1									451	8			425	4					202	2	877.5650498	30.37420785	1795.19632	9.116921768	2731	10	481.9	5.4
851	16	695.6	7.4											242.5	13									748	16			424.6480749	9.598732923					200	2	878.5655436	18.34240075	1870.974447	10.83275285	2793	10	481.9010843	9.448833821
857	14	696.1	7.7											416	22.3									746	11			423	5					199	4	879.4	28.4	2515.706824	6.850982681	2904	11	482.6188945	9.388713242
860	15	702.9	7.4											439	13.5									297	3			423	4					180	2	884.8787638	13.63396628	1599.872344	15.21534565	138.6	23.9	486.7	3.65
863	13	704	7.5											322.6	13.9									296	6			422.1829619	4.180338494					66	1	885.4118246	14.45126967	1888.483638	8.242001975	145	23.3	487.5	4.95
872	15	705.6	7.5											429.3	29.2									296	4			422	5							887.6589864	13.73297879	1951.694597	19.88816065	238.6	26.1	488	3.65
874	16	707.1	7.8											508.7	27.8									442	6			421.0763328	17.97433089							889.3	23.9	1115.4508	19.31354532	244.6	27.3	488.1	5.4
886	15	711.4	5											381	6.6									441	5			420	5							898.8	40.3	1688.15219	9.722888789	250	27.2	488.4	5.9
892	15	711.5	7.5											247.6	22.1									587	11			419	5							898.9	24.5	1699.163483	13.9614018	250.1	28.5	488.8	5.5
905	17	712.1	7.4											459.2	18.2									585	10			419	3							899.8259586	11.58152595	1241.48008	15.28100875	256.3	27.6	489.0158375	5.003598517
915	14	712.6	8.3											296.2	7.8									146	2			419	4							901.3	21.8	2560.580776	9.801993476	256.9	27.4	489.3146049	9.744431515
943	14	716.6	8											440.2	30.7									437	6			417.6267655	2.864150768							902.3708727	14.23105063	1706.919322	11.83189666	259.3	29.1	490	10
949	18	720	7.6											205	8.1									434	5			417	4							903.2	14.9	2833.416384	5.924527112	260.7	27	490.5	6.2
964	17	722.7	7.7											565.3	27.6									289	5			416	5							904.9868945	14.02378883	1501.339188	13.0494105	261.3	29.1	492.3015174	4.822689701
1160	75	727.6	8.1											787.5	37.1									144	3			416	5							908.6	70.9	1255.553226	16.30923928	262.7	27.3	493	6
1090	80	727.6	7.5											770.6	27.7									430	5			416	5							909.5965275	11.68321216	1777.401178	8.945693686	265.2	28.7	493.1	5.4
1301	140	729.5	7.7											447.6	26.3									572	8			415.0762768	22.4787935							910.5	28.5	1508.070269	12.09620318	265.5	27.4	496	5.9
1344	75	731.5	7.9											385.4	26.5									142	2			414.2823706	9.448790876							910.9	21.6	2547.630092	6.870410149	266.6	28.5	496.8	6.1
1379	46	733.5	6											414.9	24.7									141	2			414	5							913.9948873	13.75372035	1784.479046	7.610007907	268.1	28.7	498.3905309	4.938980879
1493	101	734.3	5.4											899.5	26.2									421	5			414	4							914.5588875	7.323962911	1263.064823	16.30999339	269.7	27.5	501.1943183	10.09667337
1465	59	735.9	8.3											911.9	37.6									280	6			413.5456159	12.96323276							916.2368229	14.67071517	1616.074203	13.10169166	270.2	27.9	501.4	6.1
1525	109	738.6	8.4											259.9	7.6									280	5			413	5							921.2	19.6	1984.15538	11.72385242	270.6	27.8	501.9	5.7
1410	207	744.4	7.8											452.4	9.3									416	6			413	5							923.7	23	1882.7083	9.732993793	273.1	27.3	502.3	7
1588	73	744.5	7.8											416.2	19.4									691	13			412.3486456	3.530345755							932.3699037	14.38145656	1563.430346	18.38323016	273.1	27.7	502.7	6.4
1499	59	746.1	8.4											887.9	43.8									414	9			412	5							932.5168617	15.405435	1174.53794	13.4063445	273.4	28.1	502.9	6
1595	57	750.6	6.2											424.3	9.7									414	7			411.389304	6.523701198							937.6	37.5	1319.074476	10.94061748	274.1	27.6	502.9	6
1537	57	750.8	8											361.7	7.1									412	6			411	4							937.8	27.1	1871.767683	11.82860658	275	28.6	504.2	6.1
1697	62	753.5	8											288.3	8.7									274	6			411	4							939.4	14	2755.006765	19.91376156	275	27.5	504.2	5.6
1663	51	755.4	8.4											204.2	8.1									411	7			410	4							939.7	42.4	1750.924001	9.403107762	275.4	28.9	505.4	5.7
1613	73	760.7	8.3											368.7	16.1									953	20			410	3							939.7753095	17.09094143	1201.308714	16.01344905	276.6	28.5	506	6
1677	75	764.2	8.5											890.5	19.9									136	3			409.0684275	5.014526871							943.9	21.6	1755.394873	15.0419749	277.6	28.2	508.6	3.3
1688	117	771.2	8.1											18.8	1.2									404	6			409	5							945.2	36.8	1509.932681	9.536918851	278.3	27.5	512.2	6.3
1500	64	774	8.2											813.6	31.5									404	8			409	5							951.6	38.7	1727.510844	29.79397282	278.9	27.5	514	6.1
1845	49	776.3	8.4											907.9	50									403	6			407.0233825	7.035402654							952.4	20	2019.845814	21.65597968	279.2	27.5	516.6	3.2
1884	79	777	8.1											148.3	3.6									806	11			407	5							953.9	26.8	1708.294512	16.21842134	280.9	28.1	517.2	5.8
1724	46	780.2	5.7											256.4	4.4									402	6			406	2							956.9	24.5	2546.662102	17.41147112	284.4	32.5	518.8	5.9
1696	45	780.6	8.3											466.1	36.6									267	5			405.3289345	6.179160152							963.8	22.7	1768.574567	6.71349783	284.8	29.1	522.4	6.8
1678	98	781.1	8.5											930.6	16.7									801	10			405	4							964.7	12.1	1727.953803	9.327280335	285	27.6	524.2	6.1
1872	70	782	8.2											883.9	51.3									398	6			404	4							966	22.7	1305.404502	11.66073065	286.6	28.2	526	7
1801	66	786.5	8.6											405.6	27.3									398	5			403	4							967.2	32.9	1329.925774	26.25331282	292.6	29.1	527.4	6.6
1716	60	797.1	8.1											270.7	8.9									923	12			403	4							967.3	53.9	1788.424919	10.39689399	295.3	37.7	527.7	6.2
1605	53	798.8	8.6											393.3	6.9									394	7			403	4							967.3591205	15.16547425	1681.270122	16.47515625	295.8	29.6	532.5	4.6
1846	71	799.4	8.2											257.6	14.7									262	4			403	5							967.7	28.9	1184.368189	24.69334291	306.9	28.6	538.4	6.6
1771	36	802.6	8											417.8	17.1									262	4			401	3							969.9	31.6	1215.489273	10.22415465	312	31.5	540.1	6.9
1689	59	804.5	6.7											714.5	13.1									393	6			400.3611559	4.184435308							969.9	39.1	1838.903068	9.031672292	356.6	30	544.8	6.5
1848	61	806.3	8.9											225.6	6.2									261	16			400	4							972.2	26.9	2702.139915	7.512360374	401.2	31.1	552.3	6.9
1870	44	812.6	5.7											826.3	8.7									390	6			399	4							972.8	35.4	1987.530408	9.58019799	429.8	31.5	555.5	4
1684	75	814.5	8.5											892.4	17.7									647	9			399	5							975.3	18.6	1707.8304	18.53201489	438.4	32.6	562.9	6.3
1867	58	815.4	8.4											201.2	11.3									386	7			398.5485037	1.861151868							975.3	21.2	1684.703846	13.14409615	459.8	33.9	568.3	6.8
1811	95	817.6	8.5											436.8	22.9									772	12			398	4							976.6	31.7	1714.86039	18.3821185	460.6	33.7	569.9	6.3
1770	48	820.4	9.5											248	3.1									382	5			398	4							978.4	24.3	1790.175528	17.08346256	471.8	33.3	576.3	7.4
2136	39	824.7	8.4											304.5	9.2									509	7			398	5							978.4	26.7	1790.340476	9.933163527	508.3	35.2	576.7	12.9
2001	73	827.7	8.8											364.9	23.8									254	5			397	3							979.8	25	2110.217858	9.752847605	1623.3	57.1	577.5	6.9
1985	43	828.6	8.4											900.7	17.1									380	6			397	4							981.5	10.2	2256.716643	8.741169032	1652.5	52.3	580	7.5
2120	67	829.2	8.5											449.8	34.5									886	16			397	4							982.1	35.4	1973.831	8.817702194	1655.2	43.1	587.6	6.5
2218	46	831	7.3											241	10.7									734	12			397	4							982.5461571	15.63140489	2399.243133	24.79074443	1660.1	41.5	587.7	6.6
2070	73	832.7	5.8											833.3	36.9									489	10			395	4							984.6	13.4	2049.996637	14.09091261	1661	44.2	596	7.2
2097	36	833.1	6.2											265.5	9.8									363	5			395	4							985.324614	22.10754561	2541.920715	14.03968511	1662.5	79.1	596	50
2356	79	833.5	6.1											276.1	14.6									362	5			395	5							987.8	46.4	2338.718434	13.93130373	1664.6	66.8	599.8	9
2011	60	835.9	6.6											271.6	3.6									239	4			395	4							989	26.3	2450.32975	16.03364324	1678.3	50.1	603.8	7
2392	59	836.2	8.6											222	15.3									597	12			394.4666205	4.075582864							994.1	20.3	1403.202855	10.48034608	1699.9	36.1	605.6	8.8
2497	41	844.2	9.1											866.8	20.8									119	3			394	4							994.7	12.8	1699.811275	21.52852758	1700.1	49.1	609.2	7.4
2358	54	853.1	8.6											751.5	47									833	10			393	4							998.8	18.4	283.7813577	4.712171736	1712.6	43.3	610.4	7.1
2572	67	855.7	8.8											388.3	20.1									475	8			391	5							1002.3	58.5	278.7971838	7.211603945	1736.9	79.1	624.7	7.7
2054	53	861.9	9.3											439.4	26.6									946	11			390	4							1007.6	12.6	447.8995467	6.536775386	1772.4	52.8	631.4	7.6
2155	41	868.9	10.3											493.2	9.8									354	5			389	5							1039.840447	10.80790057	276.1173497	7.700519286	1848.2	42.1	631.5	7.4
2557	51	871.2	9											408.8	19.6									235	5			388	4							1042.9	20.1	297.1188268	6.645813631	1852.8	39.8	632	5.5
2398	51	872.8	9.2											92	3.9									235	5			388	5							1064.5	21.2	327.6882458	5.429758303	1858.1	32.5	643.4	7.6
2534	48	880.7	6.5											259.5	12.8									350	4			387.0733315	6.338086241							1068.721606	22.41212365	254.7172842	3.662939797	1865.9	60.6	645.8	7.5
2302	113	882.2	9.1											218.4	11.9									932	13			385	5							1075.7	21.4	460.4730158	17.20348908	1872.7	43.7	650.8	7.9
2451	49	883.3	9.3											266.2	5.5									349	9			384.6198918	15.0015104							1075.8	26.1	312.0764173	6.16065643	1886.6	44.1	660.4	8.7
2477	58	894.7	6.8											438.8	9.6									465	8			384	3							1086.5	24.7	320.2241222	7.502035472	1898.1	41.2	665.5	7.2
2512	47	894.9	9.3											283.6	22.5									115	2			384	5							1088.7	14.6	346.3584612	5.280886642	1906.9	47	667.3	7.9
2366	60	897.5	9.8											70.1	3.7									460	15			383	4							1091.8	53	287.4993925	4.870620917	1909.5	35.1	674.7	7.4
2409	47	902.6	9.9											306.4	26.1									229	3			381.770623	8.98019353							1096	12.6	474.6013556	7.830736904	1920.5	38.8	679.2	7.4
2516	42	908.8	11.1											701.5	32.8									229	4			381.1573273	14.3983173							1103.4	20.4	426.6318528	6.542605975	1930.2	32.7	681	5
2917	33	911	9.7											141.4	3.1									22.8	0.5			381	4							1106	16	322.8056838	5.491650718	1934.5	36.7	682	7.4
89	2	911	9.5											395.8	23.9									569	7			380	4							1110.9	27	313.0993311	4.440157651	1936.1	37.5	684	7.6
102	3	913.5	9.1											452	11									681	11			380	4							1113.2	14.2	485.3979614	9.214436954	1945.9	35	692.9	7.6
104	2	913.8	9.8											738.4	36.5									340	4			380	5							1113.5	20	297.686156	5.689714372	1950.1	39.9	696.4	10.4
104	3	915.1	9.8											441.6	36.2									225	3			379	4							1117.3	11.9	485.6378996	6.531798507	1960.1	39.2	702	7.5
150	3	916.2	9.5											412.3	11									337	4			377.084916	16.47040516							1119.7	24.1	290.2266817	5.793828393	1971.3	39.7	704.3	7.9
160	4	917.1	9.3											95	2.4									449	6			377	5							1120.420935	39.39630892	339.3606021	8.784115493	1972.5	35.2	708.1	7.9
186	5	917.5	9.3											314.8	10.4									444	8			377	3							1121.080947	20.9999066	455.5805464	8.929067996	1990.3	37.7	709.9251394	10.16158506
191	4	919.9	9.8											821.2	58.4									885	40			377	4							1122.1	24	416.4204023	10.22318022	1994.4	39.1	716	7.5
195	7	922.6	9.3											994.4	56.1									221	3			376	5							1131.9	11	285.3537133	4.226629286	2006.7	40.4	719.1	8.6
200	4	922.6	9.6											347.1	11.8									330	6			375.8594352	6.637050326							1144.6	27.3	449.8897283	5.661266944	2030.2	36.7	719.2	7.8
205	5	925.4	6.7											401.1	33.1									219	3			370	5							1163.9	11.4	430.1571052	7.889074421	2067.8	37.8	724.1	9.3
213	4	925.5	11.4											357.8	11.8									219	3			369.8818355	5.132011196							1167.5	11.4	447.6346662	7.425969142	2152.3	37.2	725.5	8.2
213	4	931.1	9.5											243.1	10.8									219	3			368	6							1175.1	28.8	314.616772	5.265214568	2307.2	35.7	728	5.5
222	5	931.2	9.7											877.9	19.4									218	5			366.1313521	15.39066164							1182.2	18	495.7128976	6.144711668	2341.2	37.1	733	8.7
231	8	931.4	9.4											220	10.8									326	6			366	4							1183.4	16.7	279.8292304	3.425087932	2350.8	35.2	734.2	8.5
235	6	933	9.6											416.9	11.6									431	6			363.2082775	1.174812846							1184	87.4	454.0939996	6.944754351	2360.6	54.7	734.9	9.1
237	6	937.6	9.6											258.2	12.6									107	2			359	4							1188.7	21.1	476.9693052	7.478516633	2367	46.3	736.5	10.9
238	6	939.5	9.7											476.4	39.5									214	3			354	4							1195.1	11.3	425.9182225	7.214766569	2370.1	39.7	736.8	8.1
238	6	942.3	9.9											202	5.6									214	4			354	5							1204.3	80	455.4232971	7.721495744	2404.2	39.1	737.1	9.7
238	5	943.8	9.7											394.5	11.3									638	8			353.0510341	3.052622595							1204.8	22.6	465.1604935	6.373153228	2425.7	35.9	739	8.2
240	5	949	6.7											427	9.4									845	13			352	4							1251.9	82.6	472.982735	6.847325738	2433	46.1	740.4559007	6.080154481
240	7	950.3	9.6											388.8	18.4									211	5			351.3144557	13.70130251							1276.8	20.2	277.4524036	3.282789764	2437.7	40.2	750.3	8.1
246	6	951.7	10.7											246.3	12.4									315	7			351	4							1284	26.7	294.6785574	3.568437492	2439.6	39.8	751.4	9.9
249	6	952.9	10.3											895.7	22.7									943	16			347	4							1294.8	23	399.7750956	4.556213268	2443.9	39.2	754	9.3
249	8	955.2	6.5											402.9	6.8									417	10			346	4							1298.3	15.6	460.719767	5.947392556	2446.4	40.3	756	8.4
251	5	955.8	10.1											273.4	9.4									20.8	0.3			343	4							1307.4	11.9	462.0599739	7.069348756	2448.1	41	759.5	8.2
252	7	956.6	9.6											302.6	1.2									416	5			342.762484	14.07729708							1308.4	37.8	427.1221455	8.444007944	2459	38.1	760.2	8.7
255	6	958.3	9.8											623.4	14.7									416	6			341	4							1312.2	27	962.1704	14.34899677	2464.9	36	762	5.5
257	7	961.6	9.7											576.5	13.7									414	6			340	4							1317.1	12.6	476.995772	9.588665296	2471.2	44.7	763.2308202	10.59118568
258	8	961.9	9.7											225.3	6.3									413	6			339	4							1330.3	36.7	278.9217196	5.529591727	2490.8	40.1	764.5	8.5
262	10	966.2	10.3											245.9	8.9									619	17			339	3							1357.1	22.9	289.7550167	4.560749093	2497.8	34	766.2	8.6
272	6	966.8	9.9											350.7	4.8									206	3			339	4							1362.648793	16.40944885	371.4578225	13.69559102	2499.2	34.1	769.2981956	5.888506096
275	8	969.7	9.2											201.6	6.1									514	11			338.7016697	2.260814348							1366.5	33	995.6318252	13.2351201	2500.9	40.4	769.3554078	6.117315832
275	8	972.3	10											432	9.6									411	6			338	4							1380.5	11.9	458.2425784	5.626565863	2526.6	36	769.6	8.8
277	7	972.9	10.4											436.4	13.2									411	7			338	3							1396.792606	41.74658851	444.3021054	6.909974999	2530.4	47	772	5.5
279	10	973.5	9.7											193.5	10.3									410	5			336	4							1398.3	12	472.3318692	7.483841806	2543.8	38.7	775.9	8.8
280	7	974.3	9.9											274.4	7.6									408	6			336	4							1423.6	7.1	334.6679005	6.465700463	2543.8	41.8	777.6	8.8
284	7	975.9	11.2											821.3	75.1									509	7			335.9739195	18.9802618							1438.4	11.7	482.681181	6.471201326	2544	40.4	779.5	9.4
285	7	977.9	10.5											757.7	40.5									509	6			333	4							1439.132558	15.21753418	442.7037513	6.197321002	2547.9	38.7	782.9	8.9
288	5	979.6	9.9											447.5	12.6									407	7			332.0565405	14.94667616							1444.9	15.6	274.7782332	5.827672003	2548.5	44.4	784	15
290	7	983	11.3											356	28.6									811	11			332	4							1453.9	12.6	280.9480292	4.931882553	2560.3	40.3	784.4	9
292	6	983.6	10.5											401.2	24.5									708	10			331	4							1457.209325	9.722446386	442.564487	9.313307488	2562.2	40.1	788.7	9
294	6	984.6	10.1											404.4	30.1									403	8			330.3895141	1.982016959							1461.775416	15.02933306	476.7219575	7.206420107	2567.3	36.1	789.5	9.2
297	7	984.6	10.6											416.9	7.7									403	9			330	3							1464.4	19.1	537.284268	10.22107855	2572.7	67.8	789.5	8.4
297	9	985.2	10.6											899.9	38.6									905	12			329.8795058	3.375327899							1471.8	27.8	324.6271052	5.003515962	2597.8	49.1	792.2	9.8
303	7	990.4	9.2											379.9	19.2									804	12			329.1781985	14.33779038							1472.963512	18.20339817	435.8708621	6.586605179	2629.4	35.8	793.1	10.4
303	9	1009.5	9.1											259.1	1.2									401	7			329	4							1491.3	8.4	284.8332716	4.617317947	2643.2	44.4	798.3	9.3
308	10	1021.2	10.7											243.5	13.1									200	3			329	3							1506.5	22	49.32962844	1.035450179	93.8	3.1	803.7053243	10.45299686
315	7	1023.4	12.7											319.4	15.7									400	8			328	4							1511	60.7	475.0147324	5.763231831	132.7	6.1	804	5.5
315	6	1037.1	11.4											329.9	26.2									399	5			327	4							1524.8	15.9	948.8124765	10.55438262	137	3.6	807.6	8.9
317	9	1055	12.8											374.5	18.6									399	6			327	4							1531	18	446.7453029	5.864813345	138.6	23.9	808.4	9
320	6	1057.7	12.3											249.4	5.3									397	7			326.1760049	13.48335923							1550.883355	17.96571245	457.354641	7.868765917	145	23.3	808.9	9
330	7	1065.8	10.7											281.1	11.9									197	3			326.0652435	1.979298047							1557.8	11	769.3927471	11.76445193	153.3	3.7	809	9.1
335	20	1065.8	13											10.8	0.6									587	9			326	4							1558.2	2.7	426.0944001	7.047089721	186.2	12.7	811.7	9
340	11	1077.1	10											354.5	30.5									391	7			326	4							1581.120675	8.741840455	466.444875	6.318549353	211.9	15.3	813.7	9.4
340	7	1084.8	8.6											2415	16.5									391	5			326	4							1590.7	19.4	446.7252034	7.025982133	214.6	5	813.8838003	10.78797994
347	7	1086.4	9.3											2684.7	15.9									389	9			325.9308662	14.70933272							1601.8	13.8	495.3778918	8.203791211	224	10.4	814.8	9.3
355	9	1087.1	12.3											2487.5	17.4									775	13			325	2							1615	16.1	251.0919312	5.374161794	228.1	10.7	815.4	11.9
368	11	1091.1	12.3											2015.6	12.4									387	6			324.7902231	5.576222256							1633.1	12.2	816.725121	11.06274294	230.8	8.5	817.1	9.7
380	10	1101.1	11											1876.5	10.4									193	8			324	3							1634.4	14.7	470.6634832	7.153978866	233.3	10.9	819.9	10.3
387	8	1102.2	10.1											1720	16.4									386	5			323	3							1665.8	16.2	454.1271028	7.35364846	233.7	4.9	820.3	9.1
394	11	1104.8	11.9											1849.5	17									868	13			323	3							1668.4	18.3	450.807893	9.806364725	235	15.5	821	6
398	8	1112.6	9.7											1074.9	17.1									385	5			323	4							1682.7	11.9	854.0963175	10.64037733	238.6	26.1	824.1	4.1
400	18	1113.7	11											1347.8	16.7									288	4			322	4							1687.3	5.6	431.0495154	6.691291045	239.3	22.1	826.3	11
416	10	1119.4	10.2											1773.3	11									191	2			321	4							1709	10.8	282.4861337	5.768075747	242	14.2	826.8	9.6
417	9	1128.2	9											1803.7	9.5									382	6			321	4							1714.6	10.8	458.5738804	7.194723606	244	14.6	827.7	10.8
417	8	1130.7	10.1											1882.2	15.2									477	7			320	3							1721.5	13.6	446.5085366	5.571816826	244.2	8.1	828.8	9.6
418	8	1134.6	12.1											2065.6	28.9									475	6			320	3							1725.3	72	295.2739771	5.663764987	244.5	40	829.5	9.5
418	8	1153.2	11.3											2551.5	9.4									570	23			319.9794959	3.910938143							1734.2	24.8	927.6836174	17.21899803	244.6	27.3	829.5	9.2
422	12	1153.2	12											2039.8	15									284	4			319	3							1734.53106	23.77573028	270.8392213	3.766852767	249	16.1	830.8	8.9
424	10	1155.5	10.1											1860.6	12.9									473	9			318.5466108	4.033084466							1743.3	35.3	258.1674997	3.811166809	249.1	11.9	832	9.1
424	11	1158	11.4											2015.2	13.5									377	4			318.326937	13.61428859							1758.7	12.2	421.0487395	9.739616837	249.5	14.2	833.1	11.8
425	10	1162.6	10.2											2294.3	9.9									375	10			317.9705781	5.532058442							1767.4	26.7	367.470189	7.015422109	249.6	5.8	835.8	9.6
426	9	1163.6	9.9											1757.3	13.9									747	11			317	4							1773.7	19.4	476.4925862	12.8791458	250	27.2	836	4.05
430	14	1164.1	11.5											2538	9.5									371	5			317	3							1790.1	42.5	428.5078755	6.632479036	250.1	28.5	836.3	12.5
431	8	1168.6	11.1											1127.1	10.3									92	3			317	3							1797.9	14.8	915.3244719	16.00311905	253.9	10.3	836.5	9.4
432	14	1182.6	12.8											1960.8	18.6									460	7			316.8391457	2.37532621							1803.3	24.7	448.1546609	4.528690104	254.4	14.4	836.7	11.4
433	9	1190.3	11.7											1782.3	23.9									367	5			316.7927997	12.8794507							1803.4	30.5	424.5076263	6.735073717	255.6	10	839	10
433	9	1218.5	10.8											2493.5	53.1									734	10			316.7190328	8.819891668							1828	33.3	428.7804911	5.716712373	256.3	27.6	840.5	9.3
433	8	1219.7	12.7											2547.6	10.8									365	7			316.3177752	3.848071617							1828.1	18.6	440.6040612	12.45425844	256.9	27.4	841.3	9.4
433	10	1229.9	11.5											1070.3	14.7									821	11			316	3							1828.3	10.3	671.856131	8.88876622	257.2	14.7	841.4	9.4
434	9	1246.2	10.9											2507.1	9									182	3			316	4							1830.6	9.2	318.9604532	6.652683681	258.1	11.3	846.1	10
435	9	1260	12.6											1110.8	11.7									363	5			316	4							1832	56.7	248.5998226	4.955842608	258.5	45.3	847	12
435	8	1267.3	18.3											1609	14.2									270	5			316	4							1843.1	6.5	260.178186	4.167705786	259	10	849	6.5
437	12	1275.8	10.9											1154.2	19									358	5			315.8107602	13.61697145							1849.4	15	294.9092224	4.936995889	259	46.5	850.5	9.2
437	15	1281.2	12.4											2510.3	7.6									976	15			315	2							1852.143496	15.4720747	280.8444189	5.076364209	259.3	29.1	850.7	10.2
437	9	1311.4	14.9											1488.6	12.9									354	6			315	4							1853.289561	14.44199497	512.7157736	17.10624209	260.1	11	853.6	9.1
438	9	1328.3	15.6											1739.1	18.9									883	14			314	4							1854.271349	14.58676626	419.8017789	7.799155864	260.5	11.5	853.7	9.4
438	9	1333.2	10.9											1841.9	17.3									352	6			313	3							1861.5	5.9	338.4173029	7.643951194	260.7	27	854	19
440	9	1346.9	9.3											1125.2	15.5									87	2			312.8064065	2.431584171							1866.5	5.2	271.4314534	4.539821224	261.1	15.2	859.9	10.4
440	8	1362.7	11.4											1785	28.2									435	8			312	4							1897.777963	12.36084147	620.5582207	3.233102644	261.3	29.1	860.8	9.8
441	9	1363.6	10.3											1789.2	9.3									435	7			311	3							1898.043744	8.448142206	957.5173337	17.7568631	262.2	16.8	867.2	10.2
442	10	1366.2	13											1219.8	11.7									433	13			310.4663637	5.511981617							1922.2	12.7	463.5991355	10.08149302	262.7	27.3	868.3	9.4
443	8	1375.7	13.3											2028	15.1									779	10			310	4							1922.865324	15.32863673	978.8561982	23.96275606	262.8	16.9	872.1	11.5
443	11	1389.5	13.5											2492.5	41.6									259	4			309	3							1953.1	16.4	327.9602592	7.130807324	262.9	15.3	872.6	11
444	11	1403.1	9.7											2178.7	22.6									431	6			309	4							1975.7	3	446.5303126	7.901988699	263.8	7.5	879.2894432	11.25288432
444	8	1407.2	11.9											1518.3	17.5									258	5			309	3							1991.2	20	322.8354919	5.446142328	263.8	6.1	881.5	12.5
446	8	1420.2	9.7											1888	18.1									343	4			309	4							1999.299877	28.86071745	460.550725	5.113156994	264	16.4	887.9	9.5
446	8	1432.9	12.2											1015.2	40.5									427	7			309	4							2007.9	25.5	457.7531185	8.586564143	264.7	6.3	888.1	9.4
446	9	1443.3	10.4											1126.1	12.2									511	7			308	4							2012.5	17.9	438.4274037	7.943036205	265	6.1	892.3	10.7
447	7	1450.6	15.5											2123.4	16.6									511	11			308	3							2029.928767	15.97952167	305.2373177	6.553093166	265.2	28.7	893.6	9.9
447	10	1452	11.5											1871	9.7									424	7			308	4							2042.1	5.3	933.1581311	17.36389684	265.3	15.9	894.7	9.7
449	10	1459.7	10.6											1904.9	13									422	6			307	4							2046.2	9.6	324.7736651	7.00696229	265.5	27.4	895.9	11.1
450	12	1470.1	14.6											1386.8	23									758	14			307	4							2059	15.3	472.1602587	9.766430168	265.8	10.8	897.1504473	11.63290165
451	9	1486.3	14.8											1356.4	25.6									842	16			307	3							2071.391279	12.63170714	275.9967499	6.411450637	265.8	5.8	902.3646095	11.74099812
451	14	1486.7	10.9											1362.7	11.8									84	3			307	4							2074.5	14.4	404.3852523	6.325166124	266	42.8	903.4	10.8
453	10	1497.2	10.2											1870.8	14.9									419	6			306.965666	14.1181422							2080.8	17.2	773.5579627	17.00970726	266.4	9.4	906.1	11.2
454	10	1505.7	15.3											1467.3	12.1									670	8			306.5658911	2.691003168							2084.9	20.4	546.1613147	8.430690158	266.5	10.1	906.7	9.9
455	10	1510.1	15.9											1865.6	16									251	4			306.4833751	4.314953696							2086.4	6.6	917.4146387	14.98852809	266.6	28.5	910.3	10.5
456	9	1519.9	13.3											1865.5	17.7									334	6			306	4							2105.3	33.2	436.0541355	9.4302129	266.7	16.6	912.9	10.1
456	8	1520.7	12.7											1890.2	13.2									746	10			305.1214095	12.89057246							2128.236264	14.28025052	432.2184746	9.099891145	266.7	11.7	914.1230335	6.576361399
457	11	1542.1	14.6											3439.6	9									331	4			305	3							2136.381405	24.65250162	273.5968777	5.945658021	267	45.1	917	9.5
457	10	1550.5	14.1											2453.8	9.8									248	5			305	2							2137.2	15.8	376.0869137	7.386721365	267.5	10.6	918	14
457	9	1556	14.4											1120.3	11.4									909	14			305	3							2214.9	12.6	896.7733861	11.94125783	268.1	28.7	920	15.5
458	10	1571.3	16.4											1536	24.1									412	6			305	4							2228.8	6.7	267.0823563	3.861780883	268.2	9.9	925	14.5
461	8	1576.5	12.9											1602.8	17.1									412	6			305	3							2243.3	11.7	893.4491869	15.23777987	268.2	5.8	926.2	10.2
461	11	1589.3	12.2											1874.8	12									328	6			304.2605759	13.38333133							2290.9	10.6	391.1386687	6.523105507	268.2	8.3	927.8	10.6
462	11	1591.7	12											1841.2	18.6									409	7			304	3							2332	15.7	798.9832967	12.66236691	268.4	10.5	931	13
463	9	1595.7	14.8											1833.6	32.4									409	7			304	3							2399.4	14.2	942.0217852	22.03068281	268.6	24	931.2	10.9
463	10	1597.1	13											1837.1	12.9									408	7			304	3							2403	35.6	427.1462542	9.683014429	268.7	17.2	933.4	9.9
465	10	1599.3	13.1											1910	13.2									163	2			304	3							2413.4	11	439.0956367	10.25246139	268.8	12.1	934.7	10
465	9	1604.8	10.7											1059.2	84.9									812	11			304	4							2417.2	18.4	880.8270663	25.0378574	268.9	14.6	937	11.6
465	9	1607.2	14.9											1828.1	10.1									243	5			304	4							2421.2	9.4	444.1995789	6.018378722	269.1	10.9	941.8	10.6
470	10	1628.5	12.7											1642.3	24.6									324	6			303	4							2432.9	12.7	973.4787428	18.03378658	269.3	12	942.3	10.4
470	10	1632.4	16.8											1875	9.1									726	22			303	4							2450.457917	14.30090172	356.8960491	6.515651128	269.6	5.6	942.7	10.1
471	10	1640.2	10.6											1956.2	36.5									403	5			303	4							2462.8	10.3	651.1514764	15.19878089	269.7	27.5	944.7	10.6
471	9	1665.7	15.8											2318.3	12.2									804	14			302.1886071	13.34129338							2466.456996	12.3549247	276.7807537	5.176507881	269.8	10.9	945	12.5
473	12	1667.7	13.1											2043.5	20.8									241	4			302.0725592	4.143076681							2470.4	3.3	476.4885868	7.989083209	270.1	23.2	947.2	10.3
474	8	1672.2	11.9											1091.4	13									481	6			302	4							2471.866811	12.36349638	316.4529508	7.065208384	270.2	27.9	948	10.2
476	15	1683.3	16.8											1580.1	97.2									640	10			302	4							2474.4	4.8	578.2299409	10.90922664	270.5	10.9	948.5	10.3
478	9	1683.7	17.1											1617.9	9.8									399	5			302	3							2481.536062	2.911383113	309.1456488	3.436533253	270.6	27.8	950	14.5
478	8	1684.6	12.3											1563.2	15.8									399	9			302	4							2486.3	5.9	293.8954026	5.204599797	273	6.3	951.7	11.2
480	10	1685.3	19.2											2417.3	15.1									718	10			302	4							2487.7	15.9	450.2006104	7.452336152	273.1	27.3	952.4	11.7
484	11	1694.4	12.3											1854.7	24.7									318	7			301.0006639	12.77145731							2492.223389	12.08493328	412.309311	8.546935557	273.1	27.7	954.7	11.2
485	8	1696	12.2											1932.6	14.2									396	6			301	3							2492.9	5.2	481.0895041	7.374913327	273.4	28.1	954.7	10.4
486	10	1696.3	14.8											1762.1	15.6									7.9	0.7			301	3							2496.4	12	258.5629543	3.774506071	273.4	5.8	954.8	10.6
486	13	1696.9	14.7											1858.9	17.2									237	5			301	4							2496.805215	12.18553583	371.6434312	18.68831699	274.1	27.6	955	10.5
489	9	1705.5	13.9											2499.3	9.6									395	6			301	4							2497.790757	13.96487485	362.9448055	6.472568731	274.2	10	956.8	11.1
490	8	1707.5	14.7											2486.5	10.8									790	55			301	3							2501.2	9.1	324.1109135	5.891629809	274.4	11.2	958	12.5
491	9	1726.5	13.5											2466.6	14.4									393	7			300.5084585	14.61775842							2508.199053	14.27926329	1817.04876	9.064808525	274.4	5.8	962	11.6
492	8	1740.7	11.7											1825.5	10									393	5			300	3							2510.9	11.7	1585.962247	18.52078894	274.8	12.2	964.385771	11.69270307
492	10	1745.7	12.3											1426.9	10									782	11			300	4							2512.219477	16.07630221	1253.110994	12.44090482	275	28.6	966	10.5
493	9	1746.9	13.2											2002.3	10.8									547	8			300	4							2512.7	5.8	1900.972642	14.1192804	275	27.5	967.4	10.3
494	10	1750.3	13.6											3375.3	43.8									937	12			300	4							2513.8	15.2	1670.208912	13.44473934	275.1	6.6	967.9	11.5
497	12	1754.1	12.6											1302.2	21.1									390	6			300	4							2520	14.5	1700.326215	15.99340896	275.1	12.3	970.4	11.4
499	15	1756.4	14.4											2367.3	14.7									780	12			299.5282702	2.24910469							2524.6	14.8	2431.240582	19.82387459	275.3	15.9	971	15
500	9	1760.5	12.3											2436.9	9									467	6			299	4							2528.1	8.5	1769.695413	12.62291809	275.4	28.9	972	12.5
500	9	1762.9	15.4											2516.7	10.6									467	18			299	4							2529.6	7.3	1242.190749	19.6477617	275.6	11.3	973	15.5
503	9	1764.3	12.8											1449.8	20.1									389	6			298.7882158	0.906220389							2570.7	76.1	1754.096794	24.97724286	275.9	10.9	973.1	10.8
505	10	1764.8	16.8											1240.9	14									310	5			298.5612414	15.73467019							2570.8	32.5	1782.726037	11.69998229	276	11.6	973.2	10.3
506	11	1765.9	20.4											1086.9	16.4									232	4			298.293069	14.74356377							2598.8	36.2	2303.697684	8.943895824	276.4	10.5	973.4270655	11.57484308
509	9	1766.1	12.7											1865.2	11.7									464	8			298	4							2610.5	6.5	1977.101514	14.40363876	276.5	11.1	973.9	10.9
509	10	1767	13.2											1285.1	60.9									540	11			298	2							2618.2	46.8	2079.478338	8.481332339	276.6	28.5	974.3	11.4
510	9	1776.4	12.4											1609.3	13.9									925	14			298	4							2658.9	9.4	3293.854112	6.010343927	276.6	11	974.9	11
516	10	1781.8	15.9											1514.7	15.8									231	4			298	4							2659.1	8.2	1927.492491	14.87968965	277	12.2	974.9	10.2
519	11	1782.4	10.8											1940.4	15.8									385	7			297.5544366	13.14401875							2678.1	11.7	1733.714143	16.92570565	277.3	12.2	975.6	10.5
528	16	1790.4	15.1											2024.8	58.3									462	10			297.4911026	4.653843917							2801.3	10.9	2532.068787	9.534181879	277.6	28.2	979.2	10.5
532	11	1791.3	12.8											1827.3	20.4									461	7			297	3							2848	6.3	2530.363947	9.055726783	277.8	12.8	980.5	10.3
534	13	1794.6	14											1427.6	13									922	14			297	4									1445.999168	15.40803155	278.1	11	981.4	10.5
541	9	1795.1	16.1											1228.3	77.7									384	6			297	3									1744.06183	14.9869823	278.3	27.5	984.6	12.6
542	10	1800.7	11.7											2439.1	33.2									230	4			296.6489092	7.197108487									1377.885585	12.13950746	278.9	6.4	987	11
545	10	1803.4	18.6											1865.1	17.8									383	4			296	3									1494.592512	13.60373631	278.9	11	988	12.5
546	12	1806.7	10.5											2000	12									383	6			296	3									1624.652386	11.39981438	278.9	27.5	989.2	10.7
553	10	1808.3	13.1											1863.2	13									381	5			296	3									2415.197322	10.28929642	278.9	16.5	989.9	10.7
555	11	1811.9	13.6											1732.1	10.8									380	5			296	3									1723.035518	12.00198142	279.2	27.5	990.2	11.9
556	15	1817.8	13.2											2515.4	13.1									379	7			295	3									1518.156652	16.55295324	279.7	11.7	995	12.5
558	13	1821.1	12.1											2267.9	22.4									227	4			294.7080458	5.163443607									2413.77339	14.74857286	279.9	5.5	996.6	10.7
572	11	1823.2	12.3											1235.4	33									980	13			294.2295431	12.77779362									1882.606666	9.482436532	280.6	11.5	996.8	10.8
574	10	1824.8	11.9											2022.2	18.1									603	8			294	3									1996.217904	14.43774068	280.9	28.1	998.7	10.7
582	11	1828.7	11.2											1583.5	21.1									601	11			294	3									1726.560344	14.31185039	281	35.3	1002.6	11.3
604	10	1829.7	12.4											1650.7	13.4									150	2			294	4									1570.930214	24.63162351	281.5	5.6	1006.7	10.9
612	12	1830.2	10.6											1394.6	36.4									747	11			294	4									1728.380361	10.50727802	282	12.3	1008.7	11.2
615	12	1831.3	13.9											1353.9	24.5									371	6			293.9370002	4.251748864									1785.157484	10.18427032	282	6.5	1009	11.1
619	10	1831.3	13.2											1391.2	23.6									816	11			293.9310479	5.365037027									1748.448523	9.599547535	282.7	6.3	1009.4	10.9
647	16	1832.4	11.9																					370	5			293.2306806	5.65009267									1755.434236	10.79681695	283	7.6	1010.3	10.9
656	18	1842.9	11.9																					369	5			293.1309086	6.972643983									1797.585831	13.64981182	283.4	12.8	1012.9	11
666	18	1845.7	18.8																					738	10			293	3									1589.049647	9.190344705	283.6	6.9	1019	19
666	14	1846.9	12.9																					295	4			293	3									1857.886693	10.96273153	283.7	16.8	1022	9.5
669	13	1848.7	10																					442	9			293	3									1795.089858	9.530484231	284.4	32.5	1032.1	10.9
679	13	1851.4	14																					147	2			293	3									1777.13052	14.80234917	284.5	11	1037.3	11.1
688	12	1858.1	11.5																					367	4			293	4									1144.559576	11.0080458	284.8	29.1	1041.9	11.2
703	15	1859.2	15.8																					367	9			292.1968192	14.50470449									2717.289817	6.714936647	285	11.5	1042.6	11.5
710	15	1859.4	12																					807	12			292	3									1774.490408	12.00103493	285	27.6	1057.7	9.9
720	13	1864.5	12.2																					440	8			292	3									1861.314103	13.720196	285.3	11.1	1064.1	11.6
721	34	1865.4	14.1																					293	4			292	4									1745.156008	9.887493177	285.5	13.5	1065.3	11.7
723	13	1866.3	11.8																					656	16			292	4									1975.172316	8.681083499	286	6.3	1070	11.8
727	13	1866.3	23.3																					653	11			292	3									1616.687493	18.78666524	286.6	28.2	1077.1	11.7
763	14	1868.9	10.9																					435	7			291.2439718	6.445979338									1431.661434	12.45085532	287	6.4	1085.1	11.4
764	19	1876.4	11.6																					433	6			291	2									2513.227393	8.895914908	287.2	13.5	1085.3	13
768	21	1877.7	13.6																					72	2			291	3									1232.516672	16.09694395	291.6	6.1	1093.225545	15.5132343
789	15	1878.3	11.7																					144	3			291	4									2636.802931	7.852487207	292.6	29.1	1109.5	11.8
796	15	1880	13.8																					503	7			291	4									1794.854085	11.03929343	293.5	12	1123.8	15.1
802	13	1882.1	13																					503	9			290.8176285	5.733464767									2621.868691	8.414887018	295.3	37.7	1128.4	9.3
805	17	1883	16.1																					431	6			290.3077381	5.377842881									1252.361113	13.84550566	295.8	29.6	1138	21.5
805	14	1883.3	12.5																					430	10			290	3									1415.139896	13.65866793	296.1	12.7	1158.3	12.5
813	19	1884	13.7																					430	6			290	4									2101.397377	14.12548974	296.6	12.8	1161	15.5
818	14	1885.5	14.8																					143	2			290	4									2462.780493	8.520516918	296.7	14	1165	13
819	23	1888	16																					785	12			289.978571	12.78177501									1162.139742	13.08396672	301.1	13.8	1171.1	10.8
821	18	1889.3	14																					642	18			289.8553126	11.91907346									1866.888889	9.401020356	302.7	18	1174.4	13.6
826	13	1894.4	11.3																					423	6			289.8237016	5.719999309									1670.514793	12.25454233	304.3	10.4	1195.014314	11.61695887
829	18	1896.7	16.1																					352	9			289	4									2150.676701	11.53469902	306.4	14.2	1199	10
840	16	1897.6	13.6																					211	3			289	3									2034.688222	10.6972361	306.9	28.6	1223.1	13.2
842	13	1900.1	12.7																					211	4			289	3									2166.912279	12.23721522	309.6	6.7	1237.1	23.8
851	21	1900.3	16.3																					349	6			289	4									1992.822815	10.10166373	310	6.9	1255	23
852	21	1908.1	15.6																					13.8	0.7			288.9924378	15.61804872									1973.673765	8.448626181	310.9	13.6	1280.5	13.2
855	24	1909.5	10.7																					138	2			288.3143838	13.89293576									1453.514635	14.31938427	311.4	6.9	1286.3	13.4
861	19	1909.8	12.8																					207	5			288	3									1953.441255	8.342712532	312	31.5	1287	15.8
862	17	1919	12.2																					345	5			288	3									1850.596651	9.925892263	312.2	13.3	1292.6	8.4
862	18	1925.9	12.3																					413	7			288	2									2349.456416	8.934569223	312.9	8.8	1308.9	9.5
862	18	1928.6	11.4																					137	2			288	3									2580.173003	14.92437993	315.7	36.4	1342.9	9.5
867	16	1932.4	13.9																					409	6			288	2									2424.139624	13.28623805	316.8	7.8	1358.7	9.4
872	20	1941	10.8																					545	18			288	4									1940.595913	14.29956851	318.9	56.6	1370.4	19.3
876	18	1943.2	13.3																					613	15			288	3									2555.838929	8.09265726	319.7	6.2	1375	8
901	18	1949.7	13.3																					408	6			288	4									1832.121856	10.58846827	319.8	7	1375.9	10.7
912	18	1951.4	20.1																					612	12			288	3									1792.922151	16.19694763	320.2	11.7	1401.8	12
918	14	1953.8	12																					748	11			288	3									1840.874365	16.54855695	323.7	8.2	1411.2	9.1
919	19	1959.2	15.2																					407	6			287.3833556	1.477888159									1298.719579	23.66871239	324.2	6.9	1425.1	9.8
919	16	1963.3	13.7																					610	12			287.2046869	14.26409762									2838.425771	6.385759772	325.1	12.8	1429	11.5
929	20	1964.7	12																					270	4			287	2									1440.147751	12.01817027	329.8	11.4	1431.2	11.2
934	14	1966.3	14.4																					808	60			287	3									2553.430718	10.50067098	330.9	10.1	1440.7	11.4
952	19	1970.3	13.4																					471	6			287	4									2148.800855	10.32804159	333.9	12.9	1450.2	15.2
957	20	1971	11.9																					471	7			287	3									1982.617378	7.529696294	336.9	7.6	1469.4	9.7
964	17	1971.2	16.4																					336	5			286	3									1892.37985	8.761958221	347.1	7.6	1475.4	10.1
964	16	1975.9	14.9																					134	2			286	2									1851.523544	14.65758353	353.9	18.5	1490.9	13.3
965	22	1979.1	10.3																					402	8			286	4									1711.591951	11.8688095	356.6	30	1504.9	14.2
977	16	1979.5	10.7																					669	9			286	4									1864.844393	11.9278585	361.3	25.8	1538.152164	18.97219388
981	25	1982.2	13.7																					401	6			286	6									2173.451609	10.34178063	363.3	17.8	1565.1	11
988	19	1997.7	13.7																					267	4			285.8135907	7.469327799									2399.203183	16.07892165	370.2	8.5	1568.2	12.6
989	23	2003.7	11.4																					333	4			285.3088675	2.758398326									1624.111922	10.24166766	372.5	14.5	1579.721379	12.75491912
998	16	2005.5	16.2																					399	5			285	2									2061.186913	17.58937244	389.8	13.9	1583.5	12
946	119	2014	25.4																					399	6			285	3									1796.691988	12.29534362	392.3	18.2	1585.267216	18.73866344
1159	97	2024.5	14.6																					398	6			285	4									2093.91038	28.75560295	394	18	1600.271814	19.09673686
1146	106	2035.4	15.5																					464	7			285	3									578.6586044	14.39059803	399.5	8.4	1617	12.5
1172	52	2046.3	13																					596	9			285	3									830.5784797	13.7286489	401.2	31.1	1619.1	14.3
1214	81	2054.2	14.5																					331	5			285	3									509.3889469	11.51794004	403.2	8.7	1619.798792	17.73037975
1184	107	2058.8	13.6																					394	6			284.8613659	12.04644059									965.3489699	52.08990927	409.8	26.6	1623.897134	18.60873802
1170	75	2064.6	11.3																					328	5			284.825323	3.716836316									486.4402663	8.382622377	414.7	8.3	1626.499351	18.6807628
1147	54	2073.6	18.2																					262	6			284	3									891.5309433	29.57440665	415.1	11.9	1627.4	15.6
1259	70	2077.8	12.4																					916	12			284	4									825.5295927	16.15789985	423.4	14.8	1640.5	14.8
1189	71	2097.2	12.1																					65	2			284	3									417.7843129	6.45185471	429.8	31.5	1644.8	15.4
1067	98	2106.9	14.1																					195	3			284	3									255.4828458	5.395132427	430	14.5	1646.239923	22.07334867
1158	95	2114.9	11.9																					260	4			284	3									900.6837464	17.29198657	430.4	15.4	1647.7	25
1203	58	2140.3	11.2																					451	6			284	4									472.0967178	9.89005452	431.5	15.6	1656.46868	17.2109639
1145	102	2151.2	13.7																					321	5			284	4									466.7940331	29.560709	432.4	9.5	1660.3	14.7
1434	44	2196	16.3																					513	8			284	3									444.9788174	12.13851965	435	15.8	1663.2	14.9
1137	79	2247	12.1																					192	5			283.940213	5.339754429									450.5579334	19.71516401	436.2	14.9	1667.2	10.7
1354	88	2270.5	11.7																					256	5			283.453473	3.813346105									778.6952994	14.18850311	437.8	13.2	1668.796096	19.4107094
1461	79	2273.6	13.6																					384	6			283.4141225	1.738096494									494.3034275	6.602620927	438.4	32.6	1670.4	15.2
1416	124	2275.9	12.5																					447	7			283	3									430.9327253	9.667364915	440	21.3	1671.5	11.9
1179	60	2283.3	15.1																					446	8			283	3									909.8496862	25.41202212	440.5	9.1	1679	21.5
1227	70	2297.7	15																					445	6			283	3									830.7697938	16.65652146	443	9.6	1681.2	11.1
1431	55	2300.9	16.7																					127	2			283	3									812.8476151	21.43189218	449.3	15.3	1686.2	10.2
1437	139	2303.1	14.7																					443	8			283	3									456.5915188	4.553912131	454.1	9.2	1691.2	11.9
1357	95	2306.2	16.2																					379	8			283	3									466.2690722	6.139443005	458.1	46.9	1693.2	9.4
1304	91	2315.3	19.1																					441	6			283	4									920.4692727	19.31615541	458.4	8.5	1703.9	15.3
1346	104	2342.3	13.3																					440	7			283	4									446.2020761	8.991510969	458.9	13.5	1705.2	14.9
1480	167	2345.1	16.8																					377	6			283	3									876.2670208	20.53456153	459	23.5	1705.9	11.6
1457	47	2358.2	11.7																					753	10			282.8521371	3.285946768									441.7256844	4.348489079	459.8	33.9	1710.6	17
1345	96	2362	11.7																					437	7			282.5659767	5.268765724									437.4202013	8.089729977	460.4	10.4	1711.7	21
1311	92	2362.8	14.6																					437	6			282.5276425	2.725883382									547.9376868	6.075933546	460.6	33.7	1723.9	9.5
1399	95	2367.2	11.8																					374	8			282	2									436.128524	8.861393159	461.8	17.9	1725.3	12.5
1463	90	2387.1	13.5																					124	2			282	2									260.9475457	5.546808506	461.8	10.1	1729.6	12.2
1541	55	2390.4	11.9																					186	5			282	3									435.1041923	7.362382009	466.1	16.7	1733.3	11.4
1494	46	2402.4	11.2																					186	3			282	3									442.9266411	9.588806696	468.1	27.9	1736.2	11.9
1436	68	2410.4	12.2																					434	6			282	4									434.0707149	6.039365695	471.8	33.3	1737.8	15.2
1673	40	2415.2	16.2																					434	6			282	4									878.9737422	22.03313595	474.7	21.1	1738.8	12
1608	65	2431	11.2																					433	6			281.3447866	13.1601366									434.538837	3.515835626	488.1	10.6	1743.8	14.5
1527	48	2442	16.3																					865	13			281.0362232	12.04958895									451.580213	8.862880778	508.3	35.2	1744.3	14.8
1610	48	2445.2	14.6																					432	5			281	2									805.0946505	18.88941079	508.4	10.9	1748.4	14.3
1674	61	2447.4	16.3																					799	11			281	3									457.0024395	2.159773252	593.8	11.7	1753.4	14.3
1545	75	2448.8	13.7																					430	7			281	3									429.3906788	6.473161517	784.6	23.7	1753.4	11.5
1684	69	2450.2	12.2																					368	6			281	2									792.9931213	11.87627671	801.2	15.9	1754	9
1589	80	2468.9	13.8																					429	12			281	3									420.7542303	5.889859157	844.8	25.7	1756.6	12.2
1797	80	2470	14																					428	7			281	3									785.5347009	10.09082371	855.6	16.9	1762.2	13
1684	70	2471.1	15.8																					428	7			281	3									443.0752529	9.212951234	864.8	34.2	1765.779271	16.09122726
1732	54	2476.6	14.9																					611	9			281	4									444.5363462	7.491316935	869.7	23.5	1767.8	13.2
1738	138	2477.8	13																					244	5			281	3									770.3181363	14.48907701	875	26.3	1769.7	17.8
1810	59	2479.9	12.8																					487	7			281	3									430.1273608	9.699190944	908.5	22.6	1772.5	12.5
1759	49	2491.8	15.8																					243	5			281	3									434.9388567	8.139069583	911.9	17.3	1773	11
1587	68	2492.3	12.8																					364	6			281	3									261.929104	4.28005927	927.8	27.9	1773.2	10.4
1880	54	2493.7	13																					424	8			281	3									320.2893565	7.8012926	930.2	27.4	1773.5	10.2
1990	45	2497.5	12.3																					422	5			280.5358836	2.301528952									661.6491305	18.7956581	943.3	18.3	1773.7	15.1
1730	75	2498.6	14.3																					482	8			280.2956107	15.87691621									354.4712689	4.26344403	950.4	18.3	1775.6	14.2
1848	41	2502.4	13.5																					361	5			280	3									435.8649339	7.52676274	982.6	25	1776	14
1862	72	2507.5	15																					421	5			280	3									275.5791416	3.735334394	983.5	18.5	1777.1	9.4
1915	60	2511.2	11.6																					120	2			280	4									440.1010577	7.93277666	997.6	15	1777.2	12
1787	52	2517	15.1																					899	11			280	2									428.0765771	10.63551819	1172.9	23.2	1777.575362	17.19581092
1828	52	2520	37.1																					119	2			280	3									429.207111	10.74090781	1316.7	25.6	1778	18
2089	113	2520.3	13.5																					357	5			280	4									455.6615849	27.89312605	1347.1	22.2	1778.24661	20.666457
1967	52	2524.2	13.5																					416	7			280	3									424.8453502	9.760928501	1347.7	19.6	1779.252914	26.44808573
1878	65	2527.3	15.4																					415	10			279.2401565	2.688711843									423.6993376	7.622075855	1451.5	24.9	1782.3	10.4
2035	56	2534.5	15.3																					414	6			279.1228003	12.54502436									262.6877339	7.166995321	1463	22.9	1782.8	14.5
1818	70	2534.6	14.2																					118	2			279	3									263.8662871	5.024626	1480.1	64.3	1783.6	13.3
2013	87	2537.4	14.4																					177	3			279	2									289.8050444	4.832535139	1545	21.6	1783.8	14.9
1960	66	2538	11.6																					177	3			279	3									431.0257497	12.65625254	1617.7	39	1784.3	17.7
2120	102	2543.4	14.2																					471	8			279	4									458.2007761	12.50395131	1623.3	57.1	1785	13
2227	95	2549.7	15																					646	8			279	4									433.0462917	7.766681884	1652.5	52.3	1787.1	10.8
1834	61	2566.8	20.8																					292	4			279	3									309.7834096	4.799233024	1655.2	43.1	1787.6	10.6
2211	76	2574.2	14.4																					582	9			278.9376002	13.28600211									764.3103079	17.14308026	1660.1	41.5	1788.6	22.9
1961	68	2582	15.6																					756	15			278	3									265.8654857	3.800919123	1661	44.2	1788.8	12.8
1866	71	2590.3	13.6																					174	3			278	3									420.6595729	7.329281464	1662.5	79.1	1792.6	13.4
1922	59	2595.8	13.6																					696	14			277.9251005	6.521614505									446.7053901	6.979225606	1664.6	66.8	1792.771829	18.60024215
2466	39	2602.5	13.8																					870	14			277.5793035	11.68195226									420.4974371	1.507111427	1671.1	26.3	1794.1	14.3
2176	88	2611.7	15.3																					347	4			277.517556	13.53443519									422.6742018	7.314674593	1678.3	50.1	1797.9	12.1
2475	49	2619.9	13.3																					347	6			277.1114645	1.995563885									290.1506313	4.246110279	1682.9	29.9	1798.7	10.7
2247	39	2638.3	14.3																					635	8			277	3									224.344092	8.031567965	1683.9	29	1799.7	10.3
2412	76	2659.7	14.9																					404	10			277	3									719.0095375	17.69190023	1690.7	29.9	1800	9.5
2353	115	2680.2	13.8																					981	14			277	3									256.6379987	2.599517092	1696.2	22.4	1800.4	22.2
2080	63	2691.2	14.5																					691	14			277	3									417.8967987	5.118722093	1699.9	36.1	1801.2	14.9
2164	78	2701.2	15																					403	9			277	3									1569.69705	20.21348064	1700.1	49.1	1801.6	15.7
2345	59	2854.4	13.5																					920	13			276.4242622	2.984225851									1766.167649	26.54386063	1701.8	29.8	1802.7	15.3
2323	54	243.4043874	4.05046156																					402	6			276	3									1737.761902	31.04634454	1712.6	43.3	1803.2	14.9
2494	60	244.5216492	3.988009563																					172	3			276	3									1853.638647	13.63609735	1727.6	43.4	1804	20.1
2439	54	262.1239756	4.16777259																					229	6			276	3									2021.249243	65.26158052	1731.9	18.7	1804	12.2
2434	46	265.032407	4.290446784																					229	12			276	3									1610.628904	16.6944214	1736.9	79.1	1804.4	13.6
2552	74	274.9236243	5.46033397																					457	7			276	3									1708.255395	12.87690724	1750.6	32.8	1806	13.5
2578	100	275.0471685	4.28660522																					285	5			276	3									1449.225034	19.59864945	1759.3	18.3	1806.2	20.9
2509	51	275.7883842	4.780436487																					399	5			276	3									1693.595715	11.41276433	1759.7	22.8	1806.5	10.5
2648	81	278.381968	4.408806497																					399	6			276	3									1716.153159	17.5120596	1766.6	31.7	1806.8	14.4
2497	69	278.5054459	4.285280045																					398	6			276	3									2095.212746	32.9697825	1772.4	52.8	1806.8	14.3
2580	59	280.419052	4.407987212																					398	6			276	3									1107.782701	38.49245502	1785.8	25.2	1807.5	10.3
2630	57	281.4064975	4.592722011																					398	6			276	4									1287.517944	10.24413315	1794.3	21.9	1808.3	9.9
2553	41	283.504317	4.468437392																					341	4			276	4									1454.837471	18.4276019	1803.9	17.5	1809	10.2
2850	40	283.504317	4.345056321																					453	6			276	3									1760.163795	12.7223004	1808	23.5	1809.786953	19.14058959
2733	43	287.6979091	4.343411461																					339	6			275.9736748	12.42433451									2050.978138	16.01099729	1808.1	31.1	1810	14.2
16.1	0.5	289.6087887	4.958983755																					395	7			275.6098136	1.544159129									1769.607079	12.6404023	1808.8	31.8	1810.6	9.5
24.4	0.8	290.2867067	4.773776232																					395	7			275.6030883	12.54819356									1846.252159	28.2511348	1809.8	32.6	1810.6	16.3
84	2	290.3483321	5.020248253																					338	9			275.4305487	15.01446466									1812.946936	15.65060487	1810.6	27.2	1812.7	9.5
111	3	291.5807157	4.9580224																					168	3			275.2037844	4.698348278									2015.897765	10.62826997	1813.6	12.7	1812.7	10.8
116	2	312.3110281	4.702271815																					335	4			275	3									1779.651497	13.14478508	1814.5	22.8	1814.2	10.1
134	4	340.3781273	5.117772087																					947	11			275	3									1814.001568	10.34730968	1815	26.2	1814.2	16.1
140	4	345.268165	4.748654466																					779	10			275	2									1416.515108	26.9585347	1822.5	37	1816	10.5
175	3	376.0512082	5.221172261																					611	11			275	4									1382.463832	15.85369454	1826.9	29.8	1816.2	11.7
210	6	381.8256864	5.947204329																					388	6			275	3									1550.039145	10.35272124	1828.1	28.8	1818.6	10.4
211	4	386.5629729	5.154911635																					665	19			275	3									1793.700433	29.20856132	1828.4	32.7	1819.1	10.3
211	5	404.0849443	5.811868464																					942	13			274.9853967	12.67229414									1649.074502	26.19859005	1831.3	29	1819.4	11.3
218	6	411.5884451	5.323404561																					771	12			274.5529774	12.54913943									1284.88207	19.61368837	1831.8	52.2	1820.3	14
218	7	416.0017477	5.502310523																					385	5			274.4561565	3.684557637									1548.951321	14.51496651	1832.6	24.8	1821.2	12.7
219	6	421.2574941	6.284327451																					439	6			274.383078	3.742482987									1372.913669	11.68904086	1834.4	27.2	1821.40343	17.56912133
226	7	422.0424676	5.498857583																					384	8			274.367646	13.29064277									1232.805071	16.4021814	1836.8	13.6	1824.7	12.9
229	6	422.5254808	5.679704771																					219	4			274.1205291	13.167333									1842.3228	10.94154788	1838.7	38.6	1824.7	9.9
233	4	424.8192991	5.617977206																					219	5			274	3									1423.384655	20.21976915	1839.9	27	1825	10.6
233	6	433.9864191	5.552306947																					383	7			274	3									1265.364372	17.46795999	1842.3	17.5	1825.6	14
235	4	437.1797864	6.032354749																					820	10			274	4									1772.621372	11.29120839	1843.4	27.7	1825.6	9.1
236	4	441.0338207	5.548224264																					765	10			274	3									1217.595927	65.18946035	1846.8	27.1	1827	11.5
236	6	446.8105553	5.665175758																					326	7			274	3									1918.917161	26.31947865	1847.6	28.5	1827.4	9.9
236	5	455.4659626	5.780144033																					380	5			273.782216	1.879757222									298.5111404	4.336245236	1848.2	42.1	1828	12
240	4	460.4495687	5.897120898																					217	3			273.6516455	2.303444343									275.2845942	8.179802942	1848.8	21	1830.3	11.7
241	6	461.3498095	5.956562836																					867	11			273.626267	14.27995814									253.5107524	5.350875098	1849.1	15.7	1831	12.2
244	4	464.6496172	6.134387217																					216	6			273	3									220.1633952	8.529054046	1852.1	19.4	1832	12.3
247	5	465.0694715	5.834219732																					270	8			273	2									250.4550087	5.095411619	1852.8	39.8	1833.1	9.5
249	5	469.6860659	5.831342934																					270	3			273	3									252.079799	2.80373953	1858.1	32.5	1833.9	12.2
249	4	476.0359739	6.007015296																					594	10			273	3									418.0831139	8.579196545	1859.8	27.7	1834.1	14.6
250	5	478.4903939	6.005419807																					431	5			273	3									265.2876728	5.123299328	1864.1	58.4	1834.5	11
251	5	478.7896495	6.364323685																					431	7			273	3									474.4456318	9.907241248	1865.1	26	1834.5	13
255	8	480.0463713	7.380684073																					377	6			273	3									397.7453837	4.86725127	1865.6	49.8	1834.5	10.1
255	7	489.7926039	5.93833301																					968	10			273	3									461.1086576	3.339126528	1865.9	60.6	1836.5	12.3
261	8	491.4653214	6.056727739																					698	12			272.984591	2.155239745									454.9631143	8.654809759	1866	23.1	1836.8	15.6
264	8	493.6750326	6.234409323																					375	5			272.8352392	2.066761886									420.889666	11.10244609	1866.2	21.3	1837	11.6
267	7	507.6324469	6.105687539																					750	9			272	4									432.5031587	7.929136457	1866.7	26.4	1837.6	12.3
268	7	509.1814069	6.46206624																					482	7			272	3									955.973953	22.35633747	1868.4	69.4	1840.5	15.5
269	6	509.3005423	6.223711859																					856	11			272	3									922.2406197	13.65172915	1868.7	40.8	1840.8	13.5
273	6	510.4917748	6.818458605																					320	6			272	3									480.9621693	9.620906045	1872.7	43.7	1842	9.7
278	10	511.2064086	6.281958367																					373	5			272	4									431.4142943	7.350535448	1873	25.8	1842.8	12.2
279	6	528.8683986	7.101150749																					746	11			272	4									468.6095739	9.133653519	1873.3	14.2	1842.8	11.1
282	8	537.1771641	6.501241845																					849	13			271.4817589	5.224135981									942.7929404	22.06527056	1875.2	37.7	1842.8	12.2
283	6	586.5706882	6.700907503																					212	4			271	3									453.2376743	6.387545767	1875.6	19.3	1843.7	12.4
286	8	655.2433216	7.231480006																					211	4			271	3									301.5631487	5.483826235	1876	21.5	1843.9	19.8
286	4	660.074909	7.285612519																					369	5			271	2									438.6439129	8.793130986	1876	30	1844.4	11.7
287	6	819.9604749	9.365435174																					896	12			271	3									434.7661027	6.725147681	1878.3	59.2	1846	11.9
293	6	833.3430182	8.896603535																					418	7			271	3									763.2496118	10.03996298	1878.8	41.8	1848	10.5
293	6	844.888635	8.770841951																					574	16			271	3									276.0463661	7.389535672	1879.6	21.2	1849.2	13.3
293	6	864.5928727	9.200598795																					417	6			271	3									424.2082303	9.76757014	1880.5	34.8	1849.8	10.8
296	5	869.8334249	8.91296216																					208	3			271	3									440.1463465	10.57082972	1884.4	26.4	1850.8	19.9
298	6	935.9033672	9.398121269																					260	5			271	2									925.4691295	43.3039886	1885	19.8	1851.1	9.9
298	7	943.202846	9.612299069																					364	4			270.8535047	4.388158482									438.813068	10.59598532	1885.4	30.1	1851.1	13
299	8	963.4477405	6.27218547																					467	6			270.8410562	4.812193734									396.6021792	8.866345828	1886.5	23.4	1851.3	10.7
299	5	968.6014071	6.100288725																					414	6			270.827898	2.21510171									434.5055576	9.458193727	1886.6	44.1	1852.4	10.4
299	7	1014.785327	5.505766414																					774	9			270.5421229	7.984175194									323.8926536	5.813978887	1887.7	24.5	1852.5	11.1
300	6	1217.800683	6.027140344																					361	6			270.1023841	4.07298878									269.1374276	6.037963464	1888.9	32.9	1853.3	11
301	5	1304.548786	10.1574345																					257	4			270	2									252.5733458	2.230318717	1889.3	24.5	1854.1	16.2
304	7	1382.484178	6.106511189																					154	2			270	3									915.8737363	24.11183396	1890.2	12.3	1854.3	12.3
308	8	1440.731645	8.34853686																					256	5			270	3									801.7026226	11.97367441	1891	36.2	1854.4	12.2
309	7	1479.515484	7.536070002																					153	4			270	3									237.5415234	13.61557034	1891.1	23.2	1855.6	14.6
318	6	1563.347475	6.34773695																					153	3			270	4									771.321272	13.65241244	1891.9	20.1	1855.7	13.8
321	8	1616.250282	6.607111964																					204	3			269	3									485.5384731	6.941872372	1893	34.6	1856	12.8
324	6	1632.060369	7.555403817																					510	7			269	3									265.0682482	7.822981189	1893.5	21.1	1858.3	11.6
331	7	1633.170102	7.068662631																					356	7			269	3									424.0016726	6.373132815	1895.7	17.9	1859.1	12.2
335	7	1785.777356	6.665488531																					355	7			269	3									906.7310774	13.21082129	1896.7	15.9	1859.1	12.2
339	8	1799.898922	7.637719921																					354	5			269	3									888.1071043	2.156447663	1897	32.2	1863.8	10.6
353	9	1814.542689	8.598697243																					556	14			269	3									258.0921156	3.238578748	1897.5	18.8	1864.1	11.8
354	7	1826.447061	6.976410632																					201	5			268.4960597	12.05992348									884.447009	19.95699577	1897.6	40.8	1864.9	12
356	9	1828.881392	6.441149943																					452	6			268	2									425.7223328	10.67343026	1898.1	41.2	1865.6	19.7
367	8	1871.242198	6.594569645																					50	2			268	3									782.3597288	20.45877948	1899.2	16.5	1866	12
372	10	1876.119464	6.809561397																					100	4			268	3									320.2197341	3.131195529	1903.8	24.2	1866.7	13.8
378	9	2314.116708	7.82012281																					150	2			267	3									905.8236906	12.82461655	1906.3	18.3	1867	11.7
382	8	2409.926883	6.663864288																					200	3			267	3									768.0785596	15.62661041	1906.9	47	1867	7.5
385	7	2516.09126	7.032016028																					400	5			266.7892111	2.976113116									265.5431963	6.558387543	1908.2	19.3	1868	13
385	8	2749.155832	7.179542551																					400	7			266.2099581	3.840796729									309.591502	8.138093385	1909.5	35.1	1868.1	17.9
386	9	2995.108508	7.017423752																					499	7			266	3									477.4103227	9.715443466	1912.7	19.9	1868.4	12.5
388	6	423	5.2																					399	5			266	3									420.6007781	7.974143491	1914.6	36.4	1869.349906	17.60638208
392	7	834.6	9.7																					349	5			266	4									951.7553429	17.93005216	1915.5	22.4	1871	8.5
397	7	597.6	6.9																					448	6			266	3									449.0278576	6.884957157	1915.6	30.5	1871.2	14.3
397	6	419.5	5																					647	10			266	3									899.8511713	15.60737336	1916.3	26.4	1872.8	11.2
397	12	970.9	10.8																					344	6			266	3									435.4224384	9.670870291	1918.5	31.2	1875	16.3
401	6	444	5																					883	13			265.5579527	5.998145408									903.3355663	30.71484929	1920.4	18.1	1876	13.5
402	10	478.7	5.9																					49	1			265.1369201	4.94425129									231.8254284	4.81661849	1920.4	19.7	1878.8	10.6
407	7	335	4.2																					245	6			265	3									266.7541758	4.902221355	1920.5	38.8	1880	17.7
411	7	984.6	10.7																					245	4			265	3									428.060984	9.0525527	1920.5	23.9	1880	10.5
412	8	484.6	5.5																					391	6			265	3									888.7958983	25.00721347	1921	38.5	1880.2	14.4
413	7	512.5	6.2																					586	10			265	3									276.9495897	5.088777503	1927.7	32.8	1884.3	11.7
414	7	486.4	5.9																					244	5			265	3									261.8458684	6.162848034	1928.1	18.2	1885	7.5
414	9	480.8	5.4																					927	11			265	3									235.5465802	7.142536428	1929	30.8	1889.7	10.9
417	10	446.2	5																					195	3			265	3									300.6225241	15.06882436	1930.2	32.7	1890.5	20.7
421	7	963.7	10																					390	6			264	2									425.3651332	4.821842432	1932.7	23.6	1890.8	14.5
425	7	302.1	3.9																					341	5			264	3									641.9689664	32.46108222	1934.5	36.7	1893.1	17.8
425	10	289.4	3.6																					584	32			264	3									222.3533676	4.082969282	1935.1	18	1894	10
428	9	299.6	3.4																					583	8			264	3									230.8429408	2.159552994	1936.1	37.5	1897.5	12.3
431	9	342	3.9																					437	7			264	3									295.6467248	3.085991594	1937.7	20.5	1898.3	9.8
432	8	466.3	5.5																					291	4			263.8886304	7.746763959									1718.301638	23.45845438	1940.2	40.9	1900	12
433	7	311.6	3.8																					387	7			263.5672353	2.875529124									1807.061019	34.7465882	1941.4	22.1	1900.3	12.1
434	8	210.4	2.6																					387	6			263.0665415	4.376874716									1629.302615	31.00072709	1942.3	18.1	1904.6	12.9
435	8	787.2	8.8																					387	5			263	3									1497.174427	48.20061817	1942.5	33.6	1907.5	10.4
435	8	309.8	3.7																					386	5			263	3									1610.611667	11.31213437	1942.9	20.4	1908	6
435	8	449.5	4.9																					434	7			263	3									1874.318656	18.40174619	1943.4	29.3	1911.2	12.2
436	8	262.4	3.1																					385	5			262.4979246	3.958435955									1956.508037	11.28770259	1944.7	28	1913.3	15.5
437	9	457.1	5.1																					384	6			262.4790047	3.203385007									1747.192395	21.31421724	1945	24.4	1914.4	12.6
440	10	439.5	4.8																					528	6			262.1748039	4.954212383									1711.518229	11.67667124	1945.7	24.1	1915.3	15.9
441	7	335.9	3.7																					718	9			262	3									1797.469478	18.43399635	1945.8	20.3	1916.3	12.6
441	12	294.5	3.8																					525	7			262	3									1592.122948	16.94173758	1945.9	35	1924.2	15.9
443	11	954.7	11																					143	4			262	3									1298.723391	11.48081011	1949.7	18.5	1925.5	12.7
444	9	424.6	4.6																					381	5			262	2									1246.60031	17.2414535	1950.1	39.9	1927.1	14.3
445	8	460.9	5.1																					713	10			262	2									1790.452487	14.83080936	1951.9	46.2	1927.4	9.4
446	7	978.9	10.7																					95	2			261.816021	9.915892469									1755.796702	10.9591958	1955.8	16.4	1927.5	11.6
447	10	222.7	2.6																					380	6			261	3									1649.94859	32.10898049	1956.4	23.3	1928.7	16.2
447	10	264.5	3																					380	5			261	3									1815.546815	12.55361043	1958	23.8	1929	14.7
449	8	452.4	5.3																					427	8			261	4									1649.848715	17.5034975	1960.1	39.2	1929	10
449	7	946.9	9.9																					237	4			261	4									1868.016655	18.18639043	1963.2	16.5	1932.822039	19.24491698
452	9	437.6	5.1																					474	9			261	3									1794.214431	14.49120693	1963.2	18	1933	9.5
453	7	873.9	9.3																					805	10			261	3									1052.836606	10.58821263	1964.1	26.1	1933	15
453	9	375.7	4.2																					284	5			261	3									1967.351064	26.15851662	1965.9	17	1936.7	14.1
456	8	904.8	9.4																					283	5			261	3									1697.102931	9.904790758	1968.2	23.6	1939	13.3
456	7	759.9	8.2																					518	8			260	3									1809.441406	14.56943949	1970.3	18.1	1939.2	23
456	8	296.6	3.4																					376	5			260	3									1756.30261	17.15607251	1971.3	39.7	1941.3	13
457	8	784.6	9.3																					470	6			260	3									1898.823342	15.6077774	1972.5	35.2	1945	7.5
460	12	424.1	4.8																					564	9			260	4									1855.084155	12.43923587	1972.5	30.3	1949	12.5
460	8	437	4.9																					234	4			260	3									1728.868553	12.38896916	1973.8	27.4	1949.5	9.8
462	9	841.4	8.9																					421	6			260	3									1820.716474	29.77862101	1974.1	45.2	1950.3	12.6
463	7	402.9	4.5																					374	10			260	2									1570.077457	10.59009996	1974.7	20.1	1955.6	11.7
463	10	955.1	11.2																					374	5			260	2									242	3	1976	17.8	1957.853534	17.46158776
465	9	821.2	9.3																					791	11			259	3									263	4	1976.3	27	1958.7	10
466	7	872.3	9.6																					186	3			259	3									269	4	1976.3	30	1962.6	18.2
469	9	479.9	5.2																					186	3			258.7983984	5.180475067									278	4	1977.3	22.9	1963.8	12.2
474	9	314.3	3.6																					417	6			258.0350858	7.21141018									279	4	1977.9	20.1	1964	11
475	8	252.3	3.1																					417	6			258	3									280	4	1978.2	28	1969.7	13.2
476	16	432.8	4.9																					324	6			257.5388056	3.449103812									282	4	1978.8	27.2	1970.4	13.6
477	10	654	7.4																					276	5			257	1									289	5	1980.1	15.4	1971.3	12.1
490	12	400.3	4.8																					414	8			257	2									294	4	1981.4	34.5	1971.5	9.8
497	13	454.2	5.3																					414	11			257	3									297	4	1984.8	15	1974.1	9.7
550	9	203.9	2.4																					690	8			257	3									311	5	1986.6	72.3	1975.6	13.6
553	8	780.7	8.2																					732	40			256.9846027	12.93665578									317	4	1990.3	37.7	1976.2	12
556	14	283.8	3.8																					409	18			256	2									327	4	1992.1	22.6	1977	12.3
561	8	239.3	2.7																					409	5			256	3									336	6	1992.5	24.8	1977.5	13.6
563	12	264	3.2																					362	5			255	3									346	5	1994.3	32.8	1985	11
602	9	380.2	4.4																					407	6			255	3									352	5	1994.4	39.1	1990.2	17.3
638	13	132.3	1.7																					903	11			255	3									374	6	1994.7	17.2	1991	13.5
687	11	451.1	5.3																					316	5			254	3									412	5	2006.1	27.1	1993.7	9.5
700	11	475.1	5.6																					948	13			254	3									418	6	2006.7	40.4	2001	10
701	11	404.1	4.6																					676	9			254	3									422	6	2011.4	34.7	2002.4	15.9
722	21	615.8	6.6																					45	1			252	3									424	6	2012.1	35.9	2002.6	14.5
722	15	472	5.3																					90	3			252	3									428	6	2013.1	28	2006.1	9.5
731	15	412.9	4.5																					405	7			252	3									435	6	2014.6	17.6	2010	14
732	17	807.2	8.6																					495	10			252	3									441	6	2015.1	26	2011	13.5
737	14	576.7	6.4																					941	25			251.4071545	14.30598376									444	6	2022.4	35.9	2014.3	12.2
745	11	474.8	5.5																					313	6			251	3									447	6	2024.3	27.7	2017.3	14.1
754	17	426.7	4.6																					268	5			251	3									447	6	2024.8	39	2020	12.1
778	15	217.3	2.4																					400	5			250.8173079	8.827335835									450	6	2027.7	20.3	2020	11.5
786	15	396.9	4.9																					355	4			250.6543686	5.957370657									450	6	2028.1	57.6	2027.9	11
796	15	335	4.2																					133	7			250.3171601	5.658214043									452	6	2030.2	36.7	2050	9
797	14	710	7.8																					133	4			250	2									452	6	2031.3	27.3	2054.9	14.3
803	19	812.9	9.2																					266	4			250	3									455	6	2035.4	39.5	2065.445683	13.907495
805	21	237	2.6																					796	20			250	3									455	6	2039.1	25.1	2066.826545	20.31309582
815	12	547.7	5.9																					17.6	1			250	3									456	6	2042.3	23.6	2070	12.1
816	15	1582.4	11.3																					44	1			250	3									460	6	2047.2	24.4	2074.9	12.4
819	19	1449.7	10.6																					396	5			249	3									466	7	2048.2	32.7	2076.6	10.1
822	12	2000.8	11.9																					703	11			249	3									491	6	2049.6	20.9	2078.2	19.5
823	16	1268.3	10.6																					395	7			248.6166198	14.68141055									496	7	2058.9	27.3	2117	21
823	12	2514.1	12.4																					262	5			248	3									617	8	2064.2	58.4	2137.6	12.3
824	14	1915.9	11.9																					218	14			248	3									722	17	2067.8	37.8	2144	13.2
826	15	1843.7	10.6																					479	6			247	3									765	10	2079.1	12.4	2160.8	12.7
827	28	2414.4	12.3																					391	6			247	3									811	10	2082.9	43.8	2161.4	17.7
844	14	1094.8	9.3																					391	6			245.5597462	4.448467095									811	11	2095	35.7	2173.026796	20.29779469
852	18	1935.5	10																					217	3			244.877664	12.40668144									835	11	2095.3	22.9	2177.3	30
853	15	2208.2	10.6																					434	5			244.1461011	2.255263477									854	11	2099.1	15.5	2179.2	16.5
855	25	1824.2	20																					173	4			244	2									929	11	2101.6	18.1	2186.8	9.9
860	15	1365.4	9																					173	5			243	2									1039	29	2103.9	39.7	2189.5	18
868	17	1170.4	10																					908	10			242.576762	4.919302722									1256	46	2108.5	23.1	2195.1	14.7
873	17	2499.1	12.2																					215	3			242	3									1236	21	2111.5	29.4	2201.5	13.5
916	15	2539.9	11.7																					430	6			241.9422963	14.184937									1364	32	2113.7	26.4	2216.8	13.7
921	16	1752.4	10																					555	7			241	3									1400	24	2114.8	36.4	2222.5	13.5
921	17	1846.6	9.4																					127	3			241	3									1375	28	2116.9	29.7	2226.6	13.9
927	14	2627.7	11.4																					127	2			240.3486071	5.239496592									1477	23	2124	24.7	2236.2	12.5
949	15	1082.9	12.5																					254	5			239	3									1479	20	2139.1	15.6	2237.8	14
952	15	2497	10.9																					423	6			238	3									1396	26	2148.2	28	2270	17.5
962	15	2525.8	11.5																					169	2			237	3									1516	18	2152.3	37.2	2276.1	13.7
968	14	2209.9	9.9																					169	2			236	2									1428	19	2156.6	20.3	2283	7
968	15	2389.1	12.1																					211	3			236	2									1587	27	2175.6	33.3	2290	6.5
973	16	2254.9	10.5																					211	5			234.732439	4.58015278									1573	28	2176.9	33.5	2294.6	11.7
2599	36	1832.6	9.5																					253	9			232.8457795	4.348016915									1567	18	2182.2	23.7	2303.122029	18.76798222
2567	31	2447.1	11.3																					337	6			232.5138442	15.17584005									1541	30	2189.9	30.8	2304.5	11.9
2501	50	1904.4	10.3																					84	1			232	3									1582	25	2190.5	26.3	2311.3	18.3
2514	45	1807	11																					210	4			229	3									1611	47	2190.8	21.8	2312.6	13.9
2641	74	1838.9	9.4																					210	3			229	2									1601	26	2195.4	46.8	2313	13.5
2506	43	1988.6	11.2																					378	6			228	3									1601	21	2196	22.1	2315.5	12
2463	43	1888.5	11.2																					420	5			226	3									1643	36	2198.4	56.4	2316.3	10.5
2343	35	1855.6	9.3																					420	5			225	2									1651	27	2203.9	20	2317.3	10.6
2380	38	1413.6	9.6																					461	6			214	3									1706	20	2208	38.3	2326.5	12.4
2282	41	1089.2	11.2																					963	13													1697	24	2209.9	19.8	2343.4	11.6
2609	93	1787.8	9.8																					502	8													1747	26	2212.7	14.4	2352.2	10.9
2217	44	2005.2	11.5																					418	4													1742	19	2215.7	31.8	2353.7	15.4
2481	70	2384.5	10.2																					793	10													1713	31	2220.8	20.3	2371	7
2188	63	275.1	3.8																					333	4													1727	33	2239.8	36.7	2371.4	13
2072	55	289	4.7																					208	3													1752	23	2246.6	39.6	2377.6	10.6
2075	90	422.1	5.1																					373	7													1737	22	2254.8	24.5	2381.7	12.4
1967	67	257.7	3.3																					290	5													1736	23	2255.3	27.1	2396.6	12.4
2047	30	277.5	3.8																					952	17													1746	18	2256.3	19.9	2398	11.6
2100	59	431	5.7																					372	5													1801	19	2258.4	19.8	2402.8	10.6
1867	38	762.7	9.3																					371	5													1796	21	2260.3	29.9	2404.1	17
1987	28	450.8	6																					412	10													1791	30	2266.7	31.9	2411.8	11.7
2307	35	196.4	2.5																					370	6													1773	25	2275.7	14.2	2412.868823	19.50845833
1917	47	401.5	5.8																					163	3													1789	22	2282.2	42	2413.5	10.9
1910	52	399.5	5																					366	5													1803	25	2282.5	27.3	2414.9	10.9
2146	62	416.4	5.6																					569	9													1809	30	2290.6	27.3	2415	11.9
1897	57	217.5	2.9																					162	4													1800	18	2293.3	29.4	2419.1	10.5
2105	45	861.2	10.4																					364	14													1903	21	2294.5	30.1	2422.5	10.6
1861	48	459.7	5.8																					404	6													1821	18	2300.1	27.8	2429.9	11.1
1808	37	844.7	9.9																					402	6													2043	21	2300.6	26.2	2433.4	14.7
1916	29	378.9	4.9																					603	30													2294	19	2307.2	35.7	2433.511168	17.39246858
2012	62	243.9	3																					804	8													2353	15	2308.6	28.1	2437	10.5
1856	49	897.5	10.3																					241	4													2365	16	2313.3	25.9	2437.904084	13.72784652
1855	35	840.7	9.6																					281	4													2486	23	2313.8	35.9	2439.1	12.9
1806	40	246.6	3.1																					361	6													221	3	2325.8	36.2	2442	11.1
2207	95	388.8	5.9																					240	4													245	4	2331	32.2	2442.923493	20.7171536
1932	64	250.7	3.5																					320	4													273	4	2332.4	30.4	2443.7	14.2
1858	65	395	5.1																					759	11													276	4	2332.9	30.6	2444.7	11.3
1921	38	393.1	5																					399	6													277	4	2335.8	23	2447.2	10.9
2043	117	482	5.8																					399	6													288	4	2337.8	27.8	2449.2	10.6
1842	38	326.6	4.5																					438	6													295	4	2341.2	37.1	2451.2	11
1872	34	329.4	4.9																					199	3													295	4	2342.5	29.5	2459.1	12.9
1791	52	375.1	4.7																					199	3													311	5	2347.7	30	2459.986639	13.56169016
1829	85	735.5	8.8																					398	6													314	5	2349.3	40.1	2460.4	11.9
1857	63	229	3																					596	10													314	5	2349.6	34.7	2462	11
1741	44	852.9	10.4																					595	11													328	5	2350.8	35.2	2462	11
1892	45	439.4	5.8																					395	6													331	5	2350.9	25.1	2464.2	14.7
1943	58	432.8	5.7																					355	9													392	5	2351.4	18.9	2464.4	13.4
1750	36	883.8	10.8																					315	7													417	6	2353.3	21.7	2465.5	10
1700	58	454.7	6.8																					666	8													425	6	2354.6	18.2	2465.7	12.5
1761	60	521.9	6.6																					235	3													425	6	2360.6	54.7	2466	9
1654	56	422	5.4																					352	6													431	6	2363.4	33.1	2467.9	14.9
1692	45	411	7.2																					781	9													433	6	2367	46.3	2471.9	10.5
1764	55	988.9	11.1																					156	2													435	6	2369.2	32.3	2474.7	13.1
1680	49	228.7	2.8																					429	6													436	6	2370.1	39.7	2476.5	19
1754	56	378.8	4.7																					311	5													436	6	2372.5	19.4	2477.4	15.3
1611	43	386.3	4.9																					233	3													437	6	2374.1	26.4	2478.8	10.3
1548	45	799.8	9.3																					233	4													439	6	2379.3	36	2478.8	13.1
1896	36	414.7	5.1																					543	6													440	6	2380.4	28	2478.9	11.1
1575	37	271.6	3.8																					155	3													443	6	2381	31.6	2479	6
1848	87	282.5	3.8																					348	6													443	6	2384.4	16.4	2483.4	15.3
1606	67	317.9	4.7																					386	5													444	6	2384.7	31.3	2484.2	12
1554	47	249.4	3.2																					347	5													451	7	2386	20.2	2488	10
1672	80	311.2	4.3																					347	10													452	7	2387.7	23.2	2489	9
1796	47	379.6	5.8																					154	4													452	7	2388.3	28.8	2489.3	13.8
1559	56	416.7	6.2																					999	15													454	6	2389.6	24.3	2492	13.5
1556	136	416	5.4																					730	16													456	6	2392.5	19.6	2492.1	10.8
1560	73	383.5	5.5																					384	5													456	7	2396.3	24	2494	9.5
1471	175	234.1	3.7																					725	10													458	7	2400.4	29.4	2494.2	10
1632	122	265.9	3.6																					381	6													462	7	2404.2	39.1	2496	13.3
1632	114	392.5	5.2																					952	12													476	6	2405.1	28.3	2496	12.6
1559	40	258.4	3.3																					152	2													499	7	2407.4	22.5	2506.8	12.9
1545	104	361.1	4.3																					684	22													508	8	2408.1	20.7	2506.941779	18.75559716
1509	152	309.5	4.2																					721	9													564	9	2410.9	30.9	2508.266966	19.36697143
1366	111	388.4	4.9																					379	5													565	8	2412.4	25	2510.5	12.1
1493	42	379.9	4.7																					758	13													721	10	2416.7	28.5	2517.3	18.6
1539	125	313.8	3.8																					416	5													745	11	2418.3	14.7	2525	6
1328	58	296.1	3.7																					416	7													769	11	2420	27.5	2533	11
1284	98	664.7	7.9																					340	5													800	11	2420.3	14.8	2533.3	17.1
1233	69	268.2	3.6																					830	10													909	12	2420.7	38.5	2541	13.3
1413	91	249.5	3.2																					339	7													930	12	2422.5	18.7	2550.1	13
1141	97	718.9	8.4																					640	16													935	12	2422.8	32.9	2555	9.5
1247	67	5011	34																					376	5													1082	22	2423.3	22.2	2555.3	11.4
1127	92	1818.5	12.5																					263	4													1181	21	2424.4	28.4	2573	8
1101	82	1832.3	13.2																					338	10													1162	37	2425.7	35.9	2583	11.7
1199	99	2442.5	11.8																					375	5													1276	36	2427.4	15.3	2587.2	13.6
1257	80	1811.1	10.9																					749	10													1252	33	2427.8	31.6	2588.1	14.7
1273	106	2059.8	10.4																					336	12													1218	27	2429	31.5	2590.8	12
992	74	1591.4	9.4																					336	6													1313	52	2430.2	22	2596.3	16.7
1083	99	1568.2	11																					373	10													1395	27	2430.2	22.8	2600.8	11
1159	92	1447	10.3																					782	16													1475	24	2430.7	19.4	2631.4	13.4
1069	47	1165.4	8.6																					521	17													1578	28	2433	46.1	2633.1	13.7
1130	85	1135.1	11.8																					446	6													1533	34	2434.6	29.2	2635.5	10.8
1040	112	1180.9	15.5																					854	11													1553	26	2435.4	40.3	2642.3	12.6
1057	185	2123.1	14.1																					408	5													1552	31	2437.6	26.1	2662.2	14.5
1189	49	442.8	5.3																					296	5													1593	29	2437.7	40.2	2672.9	13.7
13.6	0.8	468.5	6.1																					518	13													1575	30	2439.6	39.8	2677	8.5
44	1	458.2	5.9																					776	10													1632	26	2440	26.3	2687	9
44.7	0.9	309.3	3.9																					332	5													1717	27	2441.9	39.6	2781.8	14.4
81	2	289.8	3.7																					221	4													1733	29	2443.9	39.2	2959.5	11.9
101	2	918.8	11.6																					589	16													1736	33	2445.7	27.9	3067.5	11.9
102	2	386.3	5																					147	2													1689	27	2446.4	40.3	3104	10.5
128	2	474.2	6.2																					147	2													1737	19	2447.8	31.4	3118.1	13.4
148	3	412.3	5.5																					441	30													1754	20	2448.1	41	3254.9	1274.8
196	3	953.2	12																					257	7													1748	42	2453.2	19.2	3409.9	10.6
198	4	704.7	8.8																					367	6													1757	28	2453.3	31.8	3434.7	11.4
198	4	454.4	5.9																					110	2													1739	29	2456.4	20.5	3510.2	14.2
205	4	288.7	4.3																					220	3													1764	21	2457.4	22	3552.8	11.7
209	4	265.5	3.4																					146	3													1749	36	2459	38.1	3701.8	12.9
211	4	515.8	6.5																					146	2													1783	21	2460.1	34.3	135.4	5.4
215	5	314.5	4.3																					219	5													1841	16	2463.2	19.9	212.4	4.3
220	4	470	6.3																					292	6													1812	18	2464.9	36	212.5	8.1
222	4	456	5.8																					401	5													1797	17	2466.4	27.7	213.1	8.7
225	4	419.7	5.8																					364	11													1669	28	2469	26.4	213.5	4.4
225	5	480.5	6.1																					436	6													1832	29	2469.1	30.3	214.1	8.9
226	4	467	6.2																					433	10													1829	26	2469.4	87.4	214.5	5.2
229	5	346.7	4.8																					216	4													1824	19	2470.3	21.7	215.7	6.6
229	5	826.5	10.5																					396	5													1883	42	2470.6	16.6	216.9	6.4
231	5	913.6	11.2																					432	6													1891	26	2471.2	44.7	219.1	6.5
233	5	457.8	5.9																					755	11													1894	33	2471.7	20.3	219.1	5.8
236	5	418	5.1																					683	12													1930	22	2473.5	26	219.4	4.8
237	5	228.1	3																					395	7													2216	18	2473.5	21.5	219.8	31.3
237	7	268.8	3.6																					179	4													2366	22	2480.4	23.6	222.8	14.8
238	5	250.4	3.4																					358	5													2392	19	2480.4	23.5	225.8	4.6
238	5	483.2	6.5																					143	2													2491	21	2480.9	31.9	226.5	4.8
242	5	328.6	4.6																					429	7													2490	28	2482.5	27	227.8	6.7
243	5	751.9	9.5																					321	5													2531	16	2485.8	20	231.7	6.7
245	5	236.9	3.2																					21.4	0.6													2527	27	2486.7	38.3	232.2	5.9
248	5	879.7	11.1																					392	5													2568	16	2486.9	18.1	234.8	4.9
249	5	326.2	4.6																					71	2													2937	23	2488.2	25	235	4.8
252	8	280.9	4.1																					283	5													269	4	2488.7	23.4	238.8	10.7
256	5	512.2	6.4																					495	7													275	4	2489.6	23.4	239.5	7.9
257	5	430.4	5.7																					495	7													276	4	2490.2	25.7	240.8	10
257	5	278.8	3.7																					812	11													293	4	2490.8	40.1	243.5	6.8
260	5	261.1	3.5																					388	6													315	5	2495.7	19.5	245.4	8.2
262	5	286	4.5																					317	6													326	5	2497.8	34	245.6	7.4
262	5	401.4	4.8																					387	7													416	6	2499.2	34.1	246.7	8.7
265	5	752.7	9.8																					281	4													416	6	2500.9	40.4	248.1	6.9
266	8	324	4.3																					737	11													419	6	2501.7	33.7	248.6	5.1
266	5	267	3.4																					70	1													429	6	2502.7	26.9	249.5	4.6
267	5	431.3	5.7																					210	7													431	8	2505.1	24.9	250.6	5.2
268	7	447.8	6																					350	4													437	6	2513.4	18.5	253.9	4.8
270	6	433.4	5.2																					385	5													438	6	2513.8	26.6	254.4	7
272	5	737.9	9.4																					453	17													439	6	2517.8	24.2	254.8	7
273	5	252.8	3.2																					836	11													440	6	2517.9	38.5	254.8	4.8
274	6	344.2	4.5																					174	2													440	6	2519.1	29.6	255.7	8.5
278	5	296.3	4																					522	7													448	6	2522.2	14.7	255.9	8.5
279	6	313.2	4.5																					800	11													448	6	2526.6	36	256.9	6.5
280	8	1842.6	12.8																					728	11													455	6	2530.4	47	262	38.2
283	7	1314.2	12																					657	10													459	6	2530.5	25.4	262.2	7.1
285	7	1147.9	10.2																					414	5													462	7	2532.3	32.9	262.2	7.2
286	8	1935.7	13.4																					414	5													462	6	2534.1	41.2	263.3	4.8
287	5	2528	14.9																					896	18													465	7	2535	28.4	263.9	7.3
289	8	999.7	11																					653	23													479	6	2535.4	26.5	264.2	7.3
292	8	1603.7	11.4																					309	5													482	7	2536.1	25.1	265	7
296	11	2631.8	13.7																					274	7													482	7	2538.6	31.1	265.3	5.2
298	8	3072.9	14.2																					650	7													486	7	2543.8	15.4	265.5	8.4
301	10	2365.3	15.5																					205	3													486	7	2543.8	38.7	266.5	6.7
302	7	1528.5	11.6																					375	5													515	8	2543.8	41.8	267.8	7.4
303	6	2444.7	12.3																					375	5													608	9	2544	40.4	267.8	6.5
311	7	5011.7	152.9																					136	2													740	13	2547.9	38.7	268.1	7.3
312	6	1538.2	13																					679	44													776	11	2548.5	44.4	268.6	34.2
324	6	1864.1	10.7																					373	7													789	10	2555.8	20.4	268.6	8.1
340	6	1836.3	15.9																					372	6													791	11	2557.8	23.3	269.1	5.7
355	7	267.2	3.6																					844	14													861	11	2560.3	40.3	269.1	48.4
368	6	303.1	4																					775	14													887	11	2562.2	40.1	269.2	9.3
379	7	336.8	4.3																					269	5													901	11	2565.9	28.8	269.7	7.2
381	8	396.8	5																					201	5													1299	33	2566.9	18.9	270.3	7.6
381	6	425.7	6.1																					435	6													1219	30	2567.1	19.3	271.3	6.6
383	7	947.4	11.4																					301	6													1229	35	2567.3	36.1	271.6	5.1
383	8	2442.6	11.6																					234	4													1325	32	2572.7	67.8	272.3	7.3
386	7	2812.1	12.7																					401	6													1385	29	2576.1	18.9	272.4	33.7
390	8	4837	19																					401	5													1431	31	2580.7	32	272.5	10.1
392	9	277.6	3.6																					366	5													1438	31	2589.2	25.4	273.1	7.3
396	7	246.9	3.4																					431	8													1443	23	2590	21.7	273.3	44.5
399	7	252.8	3.3																					364	4													1527	26	2590.6	25.7	275.3	7.2
399	6	392.4	6																					132	2													1535	25	2592.2	30.6	275.3	6.7
402	8	387.4	6.2																					198	3													1559	23	2597.8	49.1	276	6.7
403	8	444.3	5.5																					231	6													1450	22	2606.9	97.5	276.3	6.6
403	7	284.4	4																					264	5													1599	23	2619.2	18.4	277.6	10.2
405	10	894.3	10.7																					297	4													1555	23	2629.4	35.8	278.2	7.2
410	8	455.8	6																					396	5													1591	23	2641.8	29.6	278.9	32.5
412	8	230.1	2.9																					429	7													1618	25	2643.2	44.4	279.2	5.7
413	8	461.6	5.6																					428	7													1726	30	2698.7	23.9	279.3	6.8
413	10	767.5	9.3																					263	5													1688	23	2979.7	27.1	279.9	5.7
415	6	923	10.8																					230	5													1693	24			279.9	7.6
416	7	364.4	5.3																					230	3													1694	21			280.5	7.3
417	7	428	5.8																					427	6													1707	21			280.5	7.5
417	6	982.8	12.1																					164	4													1756	23			281.3	16.1
418	8	274.7	4.3																					229	7													1768	24			282.3	5.7
419	10	280.4	4.2																					261	5													1707	22			282.4	6.8
421	7	476.3	5.8																					424	7													1736	21			283.8	51.1
421	7	376.8	5																					943	18													1769	17			285.7	6.8
423	10	392.6	5.3																					260	5													1788	24			286.7	6.1
423	11	316.9	4																					260	6													1750	29			288.7	6.8
425	8	926.4	11																					357	5													1764	23			288.8	5.6
427	11	279.6	3.6																					259	4													1712	36			288.9	5.6
428	7	438.6	5.5																					97	2													1718	26			289.7	7.3
431	7	238	3																					808	12													1771	30			289.7	5.6
431	8	414.6	5.1																					452	6													1806	27			289.9	8.2
431	7	262.9	3.6																					355	5													1855	28			292.3	33.4
431	10	420.5	5.5																					290	4													1844	24			292.4	7.9
432	9	290.6	4.1																					833	13													2017	22			292.8	22.9
435	10	385.7	4.9																					288	6													1757	22			293.8	5.7
437	8	422.3	5.6																					671	8													1861	22			299	5.7
437	9	571.1	7																					415	29													2120	20			299.3	33.7
439	8	320.3	4.4																					702	8													1946	15			299.6	7.9
439	8	421.1	5.3																					255	5																	302.4	7.4
440	8	932.5	11.3																					223	4													1833	24			303.2	5.8
441	11	257.1	3.5																					860	52													1972	22			303.7	7.7
443	9	883.7	11.9																					763	20																	306.1	6
449	8	404.5	5.1																					445	7													2002	26			306.9	7.6
449	10	711.8	9																					348	5													2063	26			307.1	7.4
452	8	445	6.4																					379	6													2180	17			309.5	8.2
453	8	202.5	2.7																					221	3													2273	26			310.5	6.4
454	8	532.7	6.6																					126	2													2454	20			314	7.4
455	9	873.3	10.6																					409	6													2388	22			315.6	7.9
456	9	409.6	5.2																					282	6													2448	19			316.4	5.9
457	8	459.9	5.8																					282	5													2466	30			317.7	6.1
462	7	435	5.7																					219	3													2492	22			319.4	8.5
471	8	505.5	6.7																					437	6													2695	16			320.3	22.5
471	7	308.5	3.9																					780	10													2564	26			322.7	6.2
472	8	398	5.2																					343	6													253	3			324.8	6.4
483	9	256.1	3.3																					187	5													280	4			324.9	9.7
488	8	423.4	5.4																					623	8													282	5			333.5	6.6
489	8	297.2	3.9																					249	3													284	4			337.9	7
508	9	421.3	5.2																					653	8													288	4			343.3	10
510	10	265	3.7																					373	8													292	4			350.9	8.8
515	11	383.2	4.9																					466	6													297	4			353.5	14.7
517	9	431.2	5.5																					93	2													310	4			357.5	7.1
522	10	430.4	5.9																					279	5													318	5			367	8.4
523	9	424.3	6.5																					279	6													318	4			368.4	7.2
536	10	518.6	6.5																					372	61													323	5			390.8	32.9
539	10	368.9	5.3																					372	5													324	5			394.3	10
541	10	417.3	5.3																					403	6													331	5			398.5	8.6
562	9	198	2.6																					465	10													341	6			400.1	7.8
564	10	786.5	9.4																					773	12													369	6			400.8	9.7
565	11	460.1	7.1																					278	4													372	6			405.6	9.4
574	10	899.9	10.8																					308	8													439	6			407	10.4
602	9	348.8	5.4																					431	6													443	6			408.9	7.9
606	13	675.2	8.7																					369	5													445	6			410.9	9.1
621	12	434.8	5.8																					307	5													452	6			412.6	6.9
622	12	434.4	5.4																					307	5													464	6			419	7.9
650	17	277.5	4																					92	2													466	7			419.7	8.8
651	12	273.6	4.1																					674	10													492	7			419.8	31
665	10	807.1	9.8																					367	5													492	7			420.6	9.2
675	18	551.9	7.8																					214	5													492	7			422.6	8.1
686	14	284.9	3.8																					275	5													502	7			423.9	9.3
716	12	258.6	3.4																					396	6													518	7			425.5	8
716	13	410.6	5.3																					792	10													529	7			425.7	9.1
720	26	585.6	7.4																					791	25													530	8			426	10.1
727	11	489.7	6.3																					395	4													536	8			426.2	8.9
729	15	464.1	5.9																					243	4													718	10			426.3	10.1
731	14	227.9	3																					334	7													762	10			427.2	7.7
731	12	208	2.7																					637	8													813	11			431.3	8.3
734	14	315.1	5																					121	2													827	12			431.3	15.7
738	12	261.9	3.9																					755	11													854	11			432.1	9.8
739	14	850.1	10.3																					332	8													857	11			432.4	11.6
746	11	246.4	4																					362	5													866	11			433.3	9.2
753	14	370.2	4.5																					270	4													878	11			433.7	7
762	15	232.6	3.5																					359	6													881	11			436.6	9.1
768	12	1762.1	10.3																					388	6													883	12			437.8	9.6
771	18	2458.6	12.3																					745	6													883	12			437.9	7.5
771	12	1398.1	10																					833	10													885	11			438	10.1
772	17	2451.6	13																					446	7													900	11			438	10.1
778	14	4597.5	161.8																					327	4													903	12			438.7	9.7
791	13	1382.9	13																					385	10													904	11			440.3	9.8
795	16	1911.5	12.9																					355	6													904	12			440.8	9.5
798	18	1441.4	9.9																					355	4													905	12			440.9	10.1
803	16	1809	12.7																					738	10													910	12			441.2	9.6
804	14	1862.1	13																					915	19													913	12			442.1	11.2
827	15	1757	11.5																					854	12													915	12			443.2	7.1
842	20	2452.6	11.5																					441	5													917	12			443.6	8.3
845	29	1827.7	13.3																					880	12													918	12			443.7	10.3
852	15	1885.5	10.5																					469	7													927	12			444.2	9.9
866	14	2510.6	11.6																					351	5													932	12			444.5	10.3
871	13	2713	21.6																					380	5													933	12			445	9.8
891	13	2483.6	13.1																					204	3													944	12			445.1	7
897	18	1645	15.9																					408	8													947	12			445.3	12.2
904	14	1853.6	11.3																					465	6													951	13			446.8	10.8
911	13	1736.7	12.1																					58	1													967	13			447.2	9.8
921	13	1412.1	13																					435	6													972	12			447.4	10.1
926	14	1614.6	10.9																					434	7													973	12			447.9	10.4
927	16	1804.5	11.1																					405	5													1094	21			448.3	8.3
931	15	1813.9	14.6																					665	12													1185	28			450	9.2
931	15	1146.6	9.4																					231	10													1351	39			450.9	8.3
935	15	1270.4	15.8																					462	8													1414	41			451.4	7.1
938	16	1210	11.5																					317	7													1360	25			451.8	15.9
939	16	1798.9	16.3																					317	9													1452	26			452.6	9.4
963	18	1980.1	11.2																					719	10													1515	27			453.2	9.3
974	17	2403.6	12.2																					345	4													1569	50			454	9.7
1172	97	2464.4	13.7																					517	9													1566	44			454.9	10
1133	90	1737.9	10.6																					344	4													1568	26			456.1	9.6
1102	79	1362.3	10.8																					544	12													1636	27			456.4	7.6
1185	100	1222.7	10.3																					143	3													1560	28			456.6	10.4
1226	98	1612.5	10.6																					285	14													1648	31			457.8	8.3
1370	92	354.1	5.7																					883	13													1675	21			457.9	8.3
1280	62	411.5	5.7																					455	7													1666	20			458	11.7
1428	73	484	6.7																					341	13													1685	18			458.5	8.5
1307	79	962.7	11.9																					170	3													1695	21			458.6	9.6
1448	98	253.8	3.3																					198	6													1722	33			458.9	9.6
1357	73	963.3	11.7																					395	5													1725	24			459.2	10.4
1547	95	980.1	12.1																					197	5													1728	37			461.2	9.8
1476	91	439	5.7																					450	10													1730	28			461.2	8.4
1451	62	394.9	5																					534	14													1799	37			461.6	10.4
1404	78	468.9	6.1																					393	5													1799	30			462.1	6.7
1557	93	273.7	3.8																					982	80													1825	17			463.7	8.4
1404	53	988.4	12.4																					84	2													1731	18			464	24.3
1381	66	448.4	6																					140	2													1850	21			464.6	9.9
1635	52	421.3	5.5																					392	6													1848	19			465.8	8.6
1619	42	340.4	4.3																					391	6													1863	32			465.8	10.7
1609	73	372.5	5.1																					641	7													1817	31			466.4	7.6
1479	76	297.6	4.2																					139	2													1864	32			466.7	8.2
1655	51	321.7	4.1																					361	14													1883	21			467.2	10.1
1634	37	453.1	5.5																					749	14													1945	31			467.4	10.1
1545	61	393.2	5.3																					748	12													2018	23			469.1	7
1573	94	809.1	9.8																					166	3													2026	28			469.7	9.7
1708	53	452.2	5.3																					856	10													2070	29			470.8	10.1
1825	54	403.3	5.9																					441	6													2332	17			471.1	7.7
1646	57	434.6	5.3																					275	4													2270	20			471.5	7.4
1792	40	517.9	6.5																					412	5													251	4			473	10.5
1812	44	899.1	11																					465	23													254	4			473.3	8.5
1889	34	431	5.9																					164	3													262	4			473.6	10.4
1916	52	414.8	5																					353	6													266	4			474.6	6.7
1827	63	407.7	5.1																					407	5													267	4			476.6	9.9
1942	41	417.5	5.8																					189	2													286	5			477.1	10.1
1973	73	516.9	6.5																					270	5													286	4			477.3	8.8
1895	67	442.4	5.8																					270	5													287	4			477.8	8.8
1941	40	440.7	5.6																					405	7													289	4			479.2	8.6
1989	34	459.4	5.6																					350	6													292	5			479.3	10.7
2099	55	44	1																					700	12													298	4			480.5	10.5
2097	57	926.9	12.4																					617	16													299	4			481.7	7.6
2249	80	445.3	5.8																					134	2													305	4			482.2	9.9
2309	38	581.4	6.8																					348	7													322	5			482.2	35.6
2503	63	246.1	4.7																					428	7													325	5			483	8.9
2409	29	418.3	5.7																					187	3													327	5			489.7	10.1
2427	35	307.7	4.2																					427	7													360	6			491.3	8.9
2568	72	623.4	7.8																					479	6													397	5			492	7.6
2157	78	320.5	5.8																					532	8													400	6			492.2	10.4
2614	60	264.2	4.1																					372	7													402	6			495.8	10.8
2454	55	436.8	6.2																					584	8													412	6			502.1	8.8
2732	30	256.9	3.7																					212	6													423	6			505	10.4
2412	67	500.4	6																					318	6													426	6			505.1	10.6
2711	28	266.9	3.3																					659	9													428	6			506.6	8.8
2389	36	385.2	4.9																					369	5													429	6			506.7	10.3
2358	85	268.2	4.1																					237	6													434	6			507.4	9.2
2695	45	900.2	11.1																					184	6													438	7			510.6	9.3
3088	48	250.4	3.2																					210	3													443	6			512.2	8.9
78	2	263.7	3.8																					315	8													445	6			514.1	10.4
197	4	424	6.2																					287	4													460	7			515	10.2
207	5	753.9	9.6																					339	4													466	7			516.7	10.5
213	7	281.8	3.5																					391	6													474	7			517	11.2
216	5	421.7	5.1																					804	14													477	7			518	9.5
217	5	409.9	6.9																					440	7													488	7			526.5	11
220	7	494.1	6.3																					207	6													495	7			536.3	10.3
223	5	238.4	3.2																					802	17													495	7			543.2	10.6
223	5	395.5	5.3																					769	11													501	8			543.4	11.2
225	7	425.6	5.2																					128	2													522	7			561.3	12.1
225	5	246.4	3.4																					256	3													593	9			623.8	12
226	4	859.2	10.8																					179	3													604	9			642.7	12.2
228	6	397.7	4.8																					332	6													740	10			680.2	9.7
232	5	693	8.5																					383	4													1136	32			702.1	11.9
233	5	339	4																					383	7													1130	24			711.8	13.4
236	7	442.1	5.2																					102	2													1222	19			729	32.2
241	6	729.8	8.7																					204	4													1271	25			745.2	13.9
244	7	441	6																					433	9													1354	28			746.3	6.4
250	6	358.2	4.6																					331	5													1377	25			792.1	14.7
250	5	422.2	5.3																					738	23													1413	26			794.8	10
250	7	822.7	10.2																					178	2													1435	33			804.2	13.2
253	6	381.3	5.1																					305	5													1542	36			810.8	16.5
253	7	385.7	4.7																					127	3													1537	38			815.2	12.8
254	6	849.7	12.4																					558	8													1540	43			817.7	7.5
256	7	525	6.4																					355	5													980	25			833	9.3
257	6	260.7	4.6																					152	10																	867.2	14.7
261	7	1414	12.1																					380	5													1595	22			889.3	16.1
262	8	1102.4	9.6																					709	9													1616	20			889.6	14.5
262	14	1040.4	9.2																					557	8													1662	28			905.3	14.9
263	5	1159.8	10.3																					354	5													1634	27			906.5	15.9
267	5	1772.7	12.4																					101	3													1705	34			910.3	15.7
269	6	1787.3	13.1																					505	6													1674	19			920.3	16.3
270	9	2421.1	12.3																					858	10													1852	18			921.1	14.9
270	7	1921.7	11.6																					252	6													1721	26			924.7	16.2
272	6	1527.9	18.5																					378	6													1746	23			934.9	16.9
273	7	1857.5	10.1																					151	2													1778	25			935	9.7
274	8	2513.5	12.1																					352	5													1879	38			939	14.3
275	6	1753.9	11.9																					226	3													1776	22			962.3	8.1
275	6	2109.3	12.2																					452	7													1839	28			972	17.7
279	7	1564.7	10.2																					225	8													1841	23			1072.5	12.4
280	9	2514.6	18.4																					275	4													1868	24			1083.4	13.1
280	6	1032.2	9.9																					400	10													1909	25			1166.4	10.6
284	5	1876.7	11.5																					299	5													1896	16			1225.6	10.4
284	6	2641.1	11.5																					423	6													1907	35			1290.2	10.3
286	7	1696.2	13.7																					644	12													1955	25			1359.2	15.8
288	9	1767	10.6																					99	2													1941	22			1398.1	10.3
289	5	1869.7	11.1																					297	4													1812	21			1444.9	44
291	5	1927.7	12.9																					717	10													2019	20			1452.2	10.8
291	7	1668.4	11																					914	11													2181	29			1452.9	9.3
292	8	1657.6	12.2																					469	8													2219	22			1455.4	14.7
294	6	4941.5	14.3																					370	6													2292	25			1458.9	17.1
298	7	2317.1	14.2																					345	6													2364	20			1469.7	11.5
298	8	394.5	5.2																					271	4													2365	16			1535.2	15.4
302	9	806.7	9.3																					369	6													2356	26			1618.7	8.2
303	8	503.1	5.8																					344	6													2472	31			1635	18.6
305	5	410.3	4.8																					221	4													2432	20			1638.5	20.2
306	7	317.7	3.9																					982	15													239	4			1644.2	10.4
307	7	989	11.2																					687	9													251	3			1650.3	14.6
309	7	274.3	3.4																					147	3													255	4			1662.6	19.5
324	8	297.8	3.4																					269	5													262	4			1671.7	16.4
330	7	742.5	8.3																					220	3													263	4			1680.5	30.5
332	6	317.9	4																					220	4													267	4			1684.1	11.8
338	6	424.5	5																					391	5													269	4			1693.5	17.5
340	10	273.8	3.3																					171	2													272	4			1695.3	12.4
343	10	452	5.8																					366	3													289	5			1700.4	9.1
349	8	412.3	5																					317	5													291	4			1704.5	9.5
353	6	553.8	7.5																					414	7													298	6			1716.8	13.3
360	10	425	5.2																					875	12													313	5			1742.1	9.5
378	9	300.2	3.6																					437	11													319	5			1753.4	20.6
378	10	483.4	5.6																					437	5													320	5			1759.2	12.6
379	10	426.9	5.1																					898	12													348	8			1764.6	12.8
381	11	460.8	5.3																					364	4													386	5			1775.6	10
382	8	385	4.7																					194	4													395	6			1783.3	15.3
386	8	985.2	10.7																					677	11													420	6			1795.9	11.4
386	9	565.6	6.8																					869	12													428	6			1802	25.9
389	36	281.5	3.5																					192	4													429	6			1803.7	11
390	7	444.1	5.2																					216	4													434	7			1806.7	11.7
397	7	884.2	9.9																					264	4													436	6			1806.8	18.6
404	15	253.6	3																					38.4	1													437	6			1815.7	11.4
405	8	456.1	5.4																					382	7													440	6			1820.6	15.1
405	7	272.5	3.3																					524	7													443	6			1833.4	12.7
407	11	434.2	5.2																					119	2													449	6			1834.9	9.8
408	9	873.7	10.4																					356	6													451	6			1835	11.3
411	9	437.5	5.1																					876	12													451	7			1843.9	12.5
415	9	634.7	7.2																					425	7													455	6			1850.6	7.7
415	14	303.5	5.2																					236	4													456	6			1860.2	13.8
417	11	441.7	5.2																					165	3													502	8			1862.2	11.6
419	9	138.7	1.9																					377	5													531	10			1864.9	15.6
419	10	864.9	9.8																					353	16													750	11			1867.6	11
421	8	423.9	5.1																					141	3													755	11			1868.1	15.5
423	11	355.5	4.5																					329	5													763	10			1870.8	9.1
424	8	273.8	3.3																					351	5													892	12			1871.7	11.2
424	8	465.2	5.8																					187	3													933	12			1876.7	13.5
424	11	766	8.8																					444	6													939	13			1883	9.6
427	10	450.4	5.3																					467	16													992	15			1885.5	12.2
428	9	885.6	9.9																					140	5													1260	18			1889.7	13.3
433	9	777.8	9.1																					140	2													1374	40			1890	8.9
435	8	230.4	2.7																					420	6													1361	30			1891	15.6
436	8	295.6	3.7																					721	12													1485	22			1892.8	9.8
436	9	380.1	4.4																					232	3													1500	50			1899.3	28.9
437	9	245.8	3																					463	7													1464	33			1902.4	14.2
439	8	350.5	4.1																					393	6													1617	24			1904.3	10.6
439	9	265.5	3.2																					369	14													1716	46			1904.4	19.1
444	7	246.3	3.1																					988	15													1585	32			1913	10.2
445	9	300.1	4.6																					321	7													1600	31			1918.4	9.6
446	10	261.4	3.2																					252	6													1608	26			1926.2	18.3
447	10	492.4	5.9																					229	4													1670	24			1928.6	11.4
447	9	543.8	6.3																					366	6													1726	26			1937.4	24
447	10	611	7.3																					753	10													1770	28			1937.8	13.1
449	13	472	6																					729	12													1734	30			1944.4	49.1
450	7	2257.4	11.4																					865	11													1758	21			1946.4	12.9
451	10	2479	11.8																					364	5													1751	21			1946.7	12.5
452	12	2051.3	11																					318	5													1871	20			1947	9.6
452	11	1759.2	11.4																					386	13													1755	25			1953.1	15.1
453	11	1774	10.8																					386	5													1758	25			1954.6	8
454	8	1302.2	9.6																					431	6													1755	41			1973.8	14.7
456	9	1288.1	10.1																					204	3													1792	30			1977.3	18.2
459	9	2652.4	10.3																					294	6													1859	29			1986.6	18
459	8	1884.4	10.8																					361	6													1808	27			1988.2	12.2
467	13	1671.9	9.9																					135	2													1851	25			1995.7	11
467	9	1936.1	10.2																					135	2													1841	30			2001.5	11
477	12	2473.4	10.1																					180	2													1880	20			2015.4	11.6
479	11	2348.1	11.1																					270	4													1930	29			2024.7	13.7
484	12	4974.8	12.3																					360	8													1917	35			2026.1	10.2
485	12	1797.3	12.1																					247	4													1957	21			2060.3	16.8
491	12	1903.2	10.8																					830	14													1975	25			2076.6	13.2
495	15	1405.7	9.6																					403	5													1986	24			2089.6	23
498	11	2071.8	11.1																					805	13													2117	25			2091.5	15.9
499	10	5042.2	84.4																					402	6													2162	34			2102.4	13.1
505	15	236.3	2.7																					223	3													2173	34			2106.9	16.9
561	13	771.4	8.3																					534	7													2372	17			2124.6	11.2
564	11	261	3																					400	7													2203	36			2143.9	8.1
571	15	401.6	4.4																					488	6													2205	21			2163.5	11.5
575	11	476.7	5.3																					487	7													2260	22			2261.9	9.5
631	27	424.3	4.6																					132	2													2424	19			2268.3	11.8
637	19	297.4	3.4																					132	3													2433	19			2279.9	12
640	11	450.5	5																					176	3													2559	30			2282.2	13
644	14	310	3.4																					220	4													2529	15			2325.3	15.4
646	10	464.3	5.2																					374	5													263	4			2327.7	10.6
684	17	210.3	2.5																					417	7													270	4			2329.2	10.4
700	18	406	4.5																					570	9													271	4			2352.5	9.3
705	18	450.1	5.2																					723	10													271	4			2366.4	11.5
711	18	359	4																					219	6													273	4			2375.4	9.4
717	11	258.7	2.9																					372	5													282	4			2398.3	20.8
751	15	291.6	3.7																					349	5													285	4			2421.2	17.6
767	19	310.3	3.5																					719	9													289	4			2439.5	15.7
777	19	395.4	4.4																					196	3													317	5			2446.9	9.3
783	15	439.2	4.8																					392	6													322	5			2458.7	9.6
785	17	443.3	5.1																					370	7													414	6			2460.2	10.3
791	15	261.4	3.1																					260	5													418	6			2498.7	13.4
800	19	484.5	5.3																					433	6													421	6			2510.6	13.4
811	12	268.9	3																					368	6													426	6			2513.9	11.4
829	15	356.4	4																					368	4													437	6			2531.5	16
836	20	453.5	4.9																					670	12													437	6			2540.1	8.8
839	18	412.4	4.6																					603	9													437	6			2541.1	13.4
841	23	444.4	4.9																					409	5													438	6			2557.2	8.9
850	19	24.3	0.3																					236	4													440	6			2615.1	13.2
874	15	873.4	9.4																					385	7													443	7			2646.6	9.5
874	19	706.2	7.5																					940	14													444	6			2702.8	17.2
904	17	751.1	8.1																					767	11													447	6			212.5	16.3
917	16	491.6	5.4																					149	2													448	6			213.1	17.5
925	19	301.4	4																					276	6													449	7			214.1	17.9
933	17	755.2	8.1																					467	6													451	7			214.5	10.4
953	17	863.1	9																					911	14													453	7			219.8	62.6
954	19	729.6	7.8																					233	4													460	6			222.8	29.6
956	23	334.4	4																					296	5													464	7			238.8	21.3
964	23	289.2	3.3																					169	2													468	6			239.5	15.8
987	22	379.9	4.3																					232	4													468	6			240.8	19.9
995	18	851.7	9																					337	5													469	7			243.5	13.6
1025	211	264	3.1																					378	5													469	7			245.4	16.5
1005	87	435.1	4.9																					418	5													469	7			245.6	14.8
1137	59	902.7	9.6																					773	9													470	7			246.7	17.4
1006	189	388	5																					459	5													471	7			255.7	16.9
1104	127	285	3.2																					667	13													471	8			255.9	16.9
1125	106	864.4	9.9																					333	6													473	7			262	76.5
1206	109	425.2	4.7																					437	7													473	7			262.2	14.3
1095	120	656.1	7																					395	6													474	6			264.2	14.7
1121	194	234.9	2.6																					187	5													475	7			268.6	68.5
1438	78	388.8	4.3																					850	9													477	7			268.6	16.2
1320	142	246.5	2.8																					352	5													477	7			269.1	11.5
1428	133	418.8	5.1																					393	7													482	7			269.1	96.8
1669	90	456.6	5.1																					827	11													487	8			272.4	67.5
1600	68	301.5	3.5																					825	12													505	7			273.3	88.9
1526	49	266.8	3.1																					474	7													777	10			275.3	13.4
1671	112	406.7	4.5																					247	5													796	10			277.6	20.4
1617	124	471.4	5.1																					781	13													820	11			278.9	64.9
1632	54	262	3.1																					267	4													826	11			280.5	14.9
1488	58	380.1	4.9																					267	4													1252	31			281.3	32.2
1678	61	481.7	5.8																					205	4													1290	41			282.3	11.4
1747	93	512.5	5.7																					410	4													1585	31			283.8	102.1
1793	150	448.8	5.1																					738	11													1445	25			288.9	11.2
1863	76	439.8	4.8																					225	5													1556	40			292.3	66.9
1737	89	902.6	9.4																					368	6													1563	21			292.8	45.8
1911	92	449.2	5.1																					367	5													1591	20			293.8	11.5
1881	79	882.4	9.3																					265	4													1609	33			299.3	67.4
1960	191	281.5	3.2																					224	4													1612	20			320.3	45
1759	83	645.2	6.9																					61	2													1657	31			333.5	13.1
2046	63	428.3	4.7																					244	7													1720	23			343.3	20
1939	124	425.8	4.7																					425	6													1692	25			353.5	29.5
1681	60	412.6	4.5																					688	9													1713	23			390.8	65.7
1855	160	416.5	4.8																					384	6													1732	21			394.3	20
1802	87	273.6	3.2																					384	5													1752	35			412.6	13.8
1773	57	231	2.9																					202	3													1754	19			419	15.8
1956	95	264.8	3.4																					747	17													1722	28			419.8	62
2016	65	241	2.8																					787	18													1743	37			425.5	16.1
1808	69	331.2	3.7																					161	2													1781	30			426	20.2
1843	94	271.4	3.3																					865	11													1717	30			431.3	16.5
1788	71	277.6	3.6																					761	13													1754	23			431.3	31.4
1898	62	720.4	7.6																					380	7													1794	20			432.4	23.3
2143	72	251.6	2.9																					400	7													2004	28			433.7	14
1911	55	892.2	11.8																					219	4													1798	21			437.9	15
1978	67	944.9	9.9																					418	7													1863	30			438	20.1
1987	77	267.1	3																					338	7													1902	24			438	20.3
1904	77	257.5	3.4																					318	7													1855	22			442.1	22.4
1934	94	1887.4	9.9																					477	13													1891	24			443.2	14.2
2042	76	2674	10.9																					576	12													1926	27			443.6	16.6
2194	52	2011.8	10																					397	6													1916	30			444.5	20.6
2119	158	2079.7	12.9																					377	7													1927	22			445.1	14
2128	82	1091.4	9.3																					515	8													2110	29			445.3	24.5
2098	51	2464.3	10.3																					396	4													1969	25			447.2	19.5
2393	89	1081.3	8.1																					396	8													1993	22			450	18.4
2275	60	2031.3	9.9																					376	5													2022	22			450.9	16.5
2179	67	2519.1	11																					158	2													2239	18			451.4	14.2
2338	68	2053.9	10.1																					375	5													2557	16			451.8	31.8
2405	67	1818.6	10																					434	5													2329	34			458	23.3
2503	56	2521.4	11.1																					197	6													2348	26			459.2	20.8
2419	95	2573.8	12.1																					393	5													2403	17			462.1	13.5
2436	105	2542.6	11.4																					333	4													2443	22			463.7	16.8
2420	49	1877.1	10.1																					137	3													2439	20			464	48.6
2553	45	1266.4	8.6																					313	14													2444	15			465.8	21.4
2587	90	1839.2	10.3																					215	3													2417	22			466.4	15.3
2571	93	2231.9	10.3																					215	4													2415	16			469.1	14
2466	50	2486.7	10.9																					410	6													2609	22			471.1	15.5
2617	55	1817.5	9.7																					798	9													2661	23			471.5	14.9
2607	59	1770	10.7																					330	6													246	5			474.6	13.5
2753	54	1479.7	13.1																					349	7													249	3			481.7	15.3
2720	44	1102.7	9.3																					465	6													252	5			482.2	71.2
3145	59	1625.8	9.6																					213	5													252	4			492	15.2
		1963.2	10.8																					213	6													261	4			506.6	17.6
		1138.4	8.1																					290	4													277	4			536.3	20.5
		2472.4	11.6																					251	5													279	5			543.2	21.1
		2417.8	10																					462	6													282	4			680.2	19.3
		2440.5	10.3																					423	8													282	5			729	64.4
		1828.2	10.8																					192	3													290	4			746.3	12.8
		2252.3	10.6																					652	36													309	5			794.8	20.1
		1153.2	8.5																					345	5													316	6			810.8	33
		751.5	10.1																					363	5													394	5			817.7	15
		444.2	5.7																					363	7													399	6			833	18.5
		742.3	9																					916	14													411	6			935	19.4
		249.3	3.3																					55.1	0.9													412	6			1166.4	21.3
		369.3	4.7																					19	2													417	6			1290.2	20.7
		421	5.3																					246	4													420	7			1759.2	25.3
		736.8	9.6																					982	16													430	6			1764.6	25.7
		268.7	3.5																					396	7													434	7			1806.8	37.2
		113.4	1.6																					226	4													443	7			1820.6	30.2
		721.7	8.6																					207	5													443	6			1833.4	25.4
		689.3	8.5																					207	3													445	6			1835	22.5
		594.5	7.3																					395	6													445	6			1843.9	25
		412.4	5.3																					489	6													453	6			1862.2	23.1
		387.4	4.7																					188	4													453	6			1867.6	22.1
		753.9	9.2																					470	8													455	6			1870.8	18.3
		962	11.4																					846	11													457	6			1871.7	22.5
		240.4	3.2																					357	13													457	6			1883	19.3
		643.4	8.1																					338	5													458	7			1885.5	24.3
		278.4	4.4																					657	12													460	6			1899.3	57.8
		419.7	6.3																					488	11													461	6			1944.4	98.2
		371.2	4.6																					225	10													462	7			2001.5	22
		387.8	5.8																					225	5													465	7			2024.7	27.4
		632.2	7.7																					449	6													466	7			2060.3	33.5
		438.3	5.4																					243	7													466	7			2513.9	22.7
		434.5	5.4																					299	14													469	7			2646.6	19
		277.6	3.5																					856	15													478	6			371.5	4.7
		963	11.3																					316	5													480	7			246.1	4.4
		409.7	5.1																					167	2													484	7			323.6	4.6
		232.6	3																					445	6													485	7			463.8	7
		572.4	7.1																					388	6													490	7			293.2	8.9
		471.6	5.9																					406	7													497	7			257.8	3.4
		1973.2	11.5																					514	7													498	11			242.1	5.2
		1976.5	14.4																					477	9													549	10			250.9	3.4
		1840.8	10.5																					477	7													584	8			264.8	3.3
		2368	13.2																					165	3													735	10			287.3	5.5
		2446.7	12.1																					275	6													737	9			398.3	5.9
		1999.3	12.6																					421	11													745	10			327.4	3.4
		1574.5	13.9																					842	12													763	10			443.6	6.2
		1940.8	13																					805	34													767	10			347.5	5.7
		1818.8	13																					255	7													995	12			449.6	6
		1942	18.1																					963	15													1591	33			211	3.3
		1850.6	12.1																					652	8													1589	30			262.6	3.9
		815.3	10.3																					234	6													1593	26			467.3	7.2
		331.1	4																					306	6													1605	27			297.3	4.4
		302	4.7																					342	5													1599	24			264.7	3.5
		931.2	11.1																					360	5													1644	26			245.7	3.6
		387.5	4.9																					378	5													1646	28			264	3.5
		274.1	3.3																					467	6													1670	18			295.4	4.6
		993	12																					341	9													1684	29			525.9	7
		341.8	4.6																					250	4													1703	29			415.2	4.5
		534.1	6.3																					356	6													1696	22			540.5	8.2
		781.9	9.5																					320	9													1697	18			467.5	7.9
		477.1	6.8																					533	6													1686	27			460.4	5.1
		275.1	3.7																					373	5													1709	26			483.1	6.4
		227.6	3																					549	9													1720	29			254.5	3.2
		891.3	10.5																					389	5													1747	29			207.8	2.9
		214.4	3																					831	11													1724	29			266.5	3.3
		295	3.8																					548	8													1765	16			403.3	5.7
		398.5	5																					229	3													1752	26			448.9	5.7
		465.3	7																					264	5													1740	18			461.7	4.7
		448.1	6.1																					299	5													1770	23			440.3	5.6
		360.9	4.6																					211	3													1782	35			447.1	5.4
		367	4.7																					526	7													1808	31			552.1	8.2
		678.9	8.5																					105	2													1826	19			523.3	6.7
		276	3.8																					262	6													1871	24			261.2	3.7
		434.5	5.7																					174	3													1795	17			452.7	5.1
		398.9	5.8																					261	4													1812	19			446.5	5.4
		897.7	10.5																					139	2													1860	27			247.9	2.9
		980.9	11.4																					330	4													1814	22			167.5	2.3
		533.9	6.8																					555	8													1991	73			253.5	3.4
		378.1	4.9																					225	5													1913	28			394.3	4.5
		853.8	10.2																					173	3													2027	23			454.9	6.3
		246.9	3.4																					346	6													2149	19			272.6	3.4
		667.8	8.4																					242	4													2290	22			362.1	3.9
		444.4	5.8																					432	6													2394	16			441.8	5.9
		364.1	4.5																					190	3													2424	15			440.9	4.5
		406.1	5																					380	6													2499	15			243.7	2.1
		410.4	5.3																					345	4													190	3			509.6	5
		445.6	5.6																					396	9													234	4			396.1	5.6
		829.9	10.4																					413	9													238	5			451.2	5.6
		424.1	5.3																					361	5													238	3			923.3	10.4
		214.8	2.9																					395	6													238	3			483	6.4
		961.8	10.9																					445	7													238	4			961.6	15.9
		848.2	10.2																					462	8													238	3			511.6	11.9
		405.1	5.1																					85	1													239	4			292.9	4.8
		442	5.7																					136	2													239	3			470.9	7.1
		804.8	10.1																					255	4													239	4			475.4	12
		416.7	5.3																					340	6													239	3			421.8	4.6
		453.4	5.8																					374	5													241	3			829	8.6
		392.8	5																					203	4													242	4			629	16.7
		444	7																					338	7													243	4			302.6	4.1
		317.3	5.2																					388	6													244	3			452.1	5.5
		443.6	5.5																					101	2													251	4			439.6	5.5
		768.1	9.7																					404	7													252	4			471.2	4
		888.5	10.9																					756	14													253	4			441	5.9
		433.3	5.4																					487	6													254	4			437.6	5.2
		602.1	7.6																					151	2													256	4			336.1	1.8
		392.4	5.1																					15.1	0.6													257	4			463.6	6.1
		425.5	5																					201	4													259	4			462.6	5.4
		272.9	3.7																					234	5													264	5			830.4	9.6
		434.2	5.8																					21.7	0.6													282	4			457.2	5.5
		1769.3	12.5																					150	2													290	4			919.6	10
		1750.1	13.1																					200	3													309	5			502.8	5.2
		1842.6	12.8																					766	11													313	5			266	3.6
		2219.3	13.1																					316	7													332	5			223.4	3.4
		1343.3	12.6																					133	2													337	5			462.8	6.3
		2508.4	12.8																					349	5													397	6			225.6	2.5
		2049.2	11.3																					166	2													420	6			440.8	5.1
		2517.9	13.1																					498	9													421	6			436.3	6.8
		1058.9	14																					929	16													423	6			224.3	4.1
		3549.8	15.6																					215	4													424	6			446.7	4.7
		1741.9	10.5																					496	6													429	6			448.1	6.7
																								281	9													434	6			335.8	4.5
																								132	2													436	6			923	10.3
																								6.6	0.2													440	6			422.5	7.4
																								379	8													443	6			362.3	4.7
																								428	6													444	6			421.5	5.6
																								493	8													445	6			448.9	4.6
																								279	5													445	6			526	4.5
																								361	6													456	6			930.4	11.9
																								164	10													457	6			989	8.9
																								393	14													458	7			431.8	3.8
																								393	6													464	7			480.9	5.8
																								473	10													465	6			538.1	6.5
																								456	6													469	6			461.1	5.1
																								846	12													470	6			439.3	5.1
																								406	8													476	7			461.2	5.4
																								146	3													477	7			464.7	4.7
																								373	6													479	7			456.7	2.9
																								243	4													509	8			623.3	6.6
																								243	3													623	8			455	4.7
																								340	5													683	10			845	15.8
																								259	9													715	9			353.3	4.6
																								971	16													729	10			251.4	5.1
																								372	4													789	11			765.4	9
																								759	12													794	11			975.1	31.7
																								339	5													801	10			447.8	5
																								258	11													805	11			287.7	3.4
																								387	6													884	12			942.1	8.4
																								548	9													1374	47			461.6	4.7
																								724	12													1321	34			235.2	3.9
																								209	3													1362	41			434.6	1.7
																								225	5													1470	51			459.2	5.6
																								225	11													1499	35			905.3	11.1
																								385	8													1612	30			272.5	7.9
																								593	9													1606	28			313.2	4.6
																								80	1													1665	21			421.4	4.9
																								96	2													1677	36			424.3	4.6
																								128	3													1716	19			277.5	4.1
																								144	4													1741	35			414.9	7.9
																								176	3													1776	20			434.1	3.2
																								368	5													1771	22			475.9	4.7
																								384	6													1780	17			914.3	9.9
																								255	4													1796	24			275.7	1.2
																								239	3													1825	25			929.1	10.9
																								350	9													1825	23			240.6	3.4
																								969	66													1804	30			239.3	2.8
																								397	10													1936	25			215.2	3.5
																								746	10													2005	36			513.5	4.8
[truncated: 1,185 more rows]
